# Supplementary material for: A stable and biocompatible shortwave infrared nanoribbon for dual-channel in vivo imaging
Source: PubMed Central journal article supplement — Nat Commun. 2025 Jan 2;16:4. doi: 10.1038/s41467-024-55445-x (PMC11696549; doi:10.1038/s41467-024-55445-x), 2025-01-02
Supplement: 41467_2024_55445_MOESM1_ESM.pdf [file 41467_2024_55445_MOESM1_ESM.pdf]

Supporting information for

## **A Stable and Biocompatible Shortwave Infrared Nanoribbon for Dual-channel in vivo Imaging**

Cheng Yao<sup>1,2</sup>, Ruwei Wei<sup>1,2</sup>, Xiao Luo<sup>3</sup>, Jie Zhou<sup>4,5</sup>, Xiaodong Zhang<sup>1,2</sup>, Xicun Lu<sup>1,2</sup>, Yan Dong<sup>1,2</sup>, Ruofan Chu<sup>1,2</sup>, Yuxin Sun<sup>1,2</sup>, Yu Wang<sup>3</sup>, Wencheng Xia<sup>6</sup>, Dahui Qu<sup>1</sup>, Cong Liu<sup>6</sup>, Jun Ren<sup>7,8</sup>, Guangbo Ge<sup>9</sup>, Jinquan Chen<sup>4,5</sup>, Xuhong Qian<sup>1,2,3</sup>, Youjun Yang<sup>1,2,\*</sup>

1. State Key Laboratory of Bioreactor Engineering, East China University of Science and Technology, Shanghai 200237, China
2. Shanghai Key Laboratory of Chemical Biology, Shanghai Frontiers Science Center of Optogenetic Techniques for Cell Metabolism, School of Pharmacy, East China University of Science and Technology, Shanghai 200237, China
3. Shanghai Engineering Research Center of Molecular Therapeutics and New Drug Development, School of Chemistry and Molecular Engineering, East China Normal University, Shanghai 200241, China
4. State Key Laboratory of Precision Spectroscopy, East China Normal University, Shanghai 200241, China
5. School of Physics and Electronic Science, East China Normal University, Shanghai 200241, China
6. Interdisciplinary Research Center on Biology and Chemistry, Shanghai Institute of Organic Chemistry, Chinese Academy of Sciences, Shanghai, 201210, China
7. Hubei Key Laboratory for Precision Synthesis of Small Molecule Pharmaceuticals & Ministry of Education Key Laboratory for the Synthesis and Application of Organic Functional Molecules, Hubei University, Wuhan 430062, China
8. Hubei Key Laboratory for Precision Synthesis of Small Molecule Pharmaceuticals & Ministry of Education Key Laboratory for the Synthesis and Application of Organic Functional Molecules, Hubei University, Wuhan 430062, China
9. Institute of Interdisciplinary Integrative Medicine Research, Shanghai University of Traditional Chinese Medicine, Cailun Road 1200, Shanghai 201203, China

Contact: [youjunyang@ecust.edu.cn](mailto:youjunyang@ecust.edu.cn).

## Table of contents

| Page    | Content                  |                                                                                                       |
|---------|--------------------------|-------------------------------------------------------------------------------------------------------|
| S3      | Supplementary Fig. 1     | Energy splitting diagram.                                                                             |
| S3      | Supplementary Fig. 2     | The detailed packing mode                                                                             |
| S4      | Supplementary Fig. 3     | Electrostatic potential distribution calculations.                                                    |
| S4-7    | Supplementary Fig. 4-11  | The absorption and fluorescence emission spectra of water-soluble ESi5 analogues in organic solvent.  |
| S7      | Supplementary Fig. 12-13 | NaCl-concentration-dependent spectral changes of <b>ESi5-NS</b> and <b>ESi5-N</b> .                   |
| S8      | Supplementary Tab. 1     | Photophysical parameters of water-soluble ESi5 analogues.                                             |
| S9      | Supplementary Fig. 14    | Concentration-dependent spectral changes of <b>ESi5-NS</b> and <b>ESi5-N</b> in PBS.                  |
| S9      | Supplementary Fig. 15    | Spectral changes after thermal annealing of JV-aggregates.                                            |
| S10-12  | Supplementary Fig. 16-21 | Spectral deconvolution of JV-aggregates.                                                              |
| S13     | Supplementary Tab. 2     | Spectral deconvolution parameters of JV-aggregates.                                                   |
| S13     | Supplementary Fig. 22    | The absorption spectrum of <b>ESi5-S agg</b> in PBS (10% FBS)                                         |
| S14-16  | Supplementary Fig. 23-30 | Electron microscopy characterization.                                                                 |
| S16     | Supplementary Fig. 31    | Femtosecond transient absorption (fs-TA) spectra of <b>ESi5-S agg</b> .                               |
| S17-19  | Supplementary Fig. 32-35 | Stability of <b>ESi5-S agg</b> .                                                                      |
| S18     | Supplementary Table 3    | The photobleaching rates and the bleaching half-life ( $\tau_{1/2}$ ).                                |
| S20-21  | Supplementary Fig. 36-37 | Temperature-dependent stability of JV-aggregates.                                                     |
| S21-22  | Supplementary Fig. 38-39 | The cytotoxicity test and the hemolysis test.                                                         |
| S22-24  | Supplementary Fig. 40-44 | The dual-channel fluorescence imaging.                                                                |
| S25     | Supplementary Fig. 45-46 | <i>In vivo</i> toxicity study                                                                         |
| S26     | Supplementary Fig. 47    | <i>In vitro</i> calcium-binding experiments.                                                          |
| S26-31  | Supplementary Fig. 48-57 | The synthetic scheme of water-soluble ESi5 analogues.                                                 |
| S31-S43 | Supplementary Fig. 58-71 | The <sup>1</sup> H-/ <sup>13</sup> C-NMR and HRMS spectra.                                            |
| S44     | Supplementary Fig. 82-83 | The ORTEP-style illustration of <b>ESi5•Cl<sup>-</sup></b> and <b>ESi5•PF<sub>6</sub><sup>-</sup></b> |

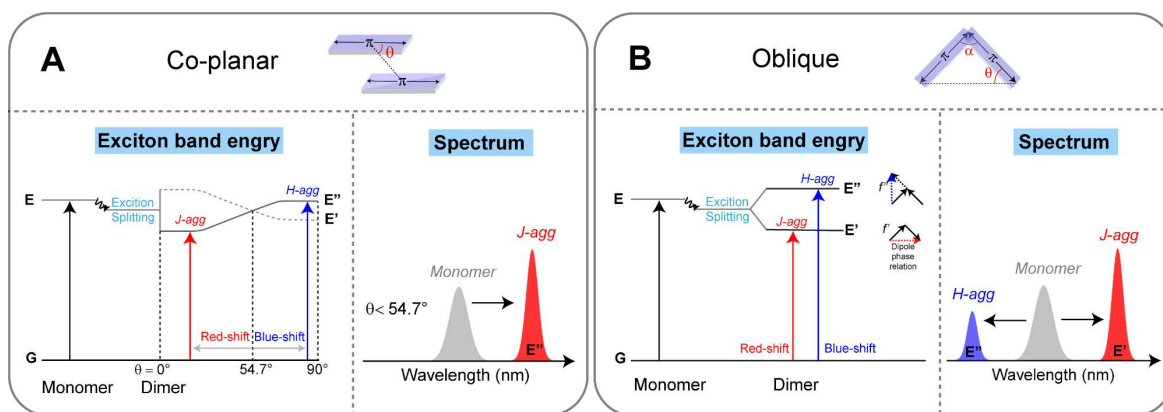

**Supplementary Fig. 1:** Energy splitting diagram of (A) linearly coupled H-dimer or J-dimer, and (B) non-linearly coupled oblique-dimer.

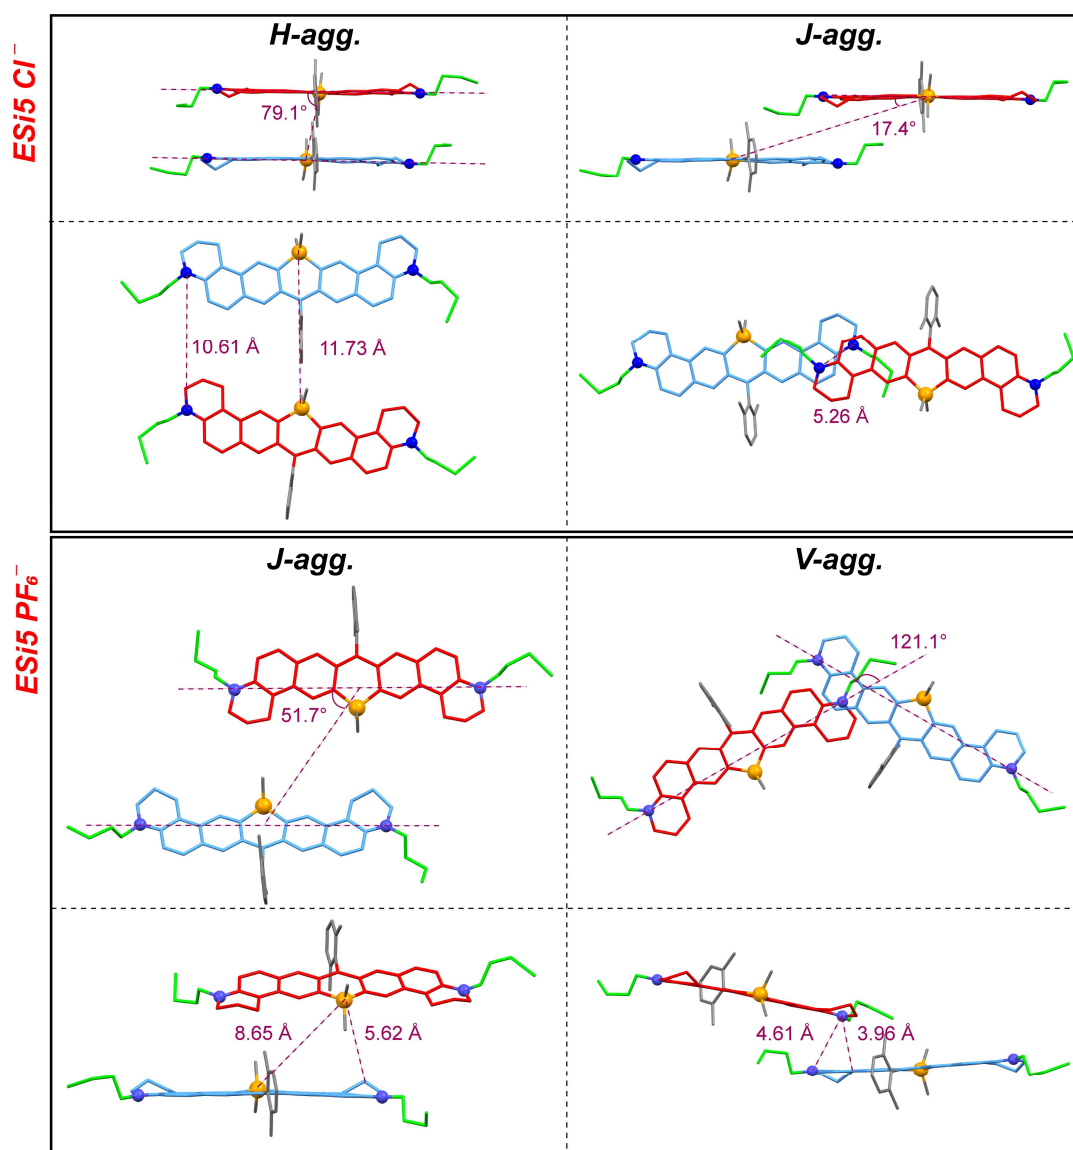

**Supplementary Fig. 2:** The detailed packing mode of  $\text{ESi5}\cdot\text{Cl}^-$  (H-aggregate and J-aggregate) and  $\text{ESi5}\cdot\text{PF}_6^-$  (J-aggregate and V-aggregate). Including slipping angle and interatomic distance.

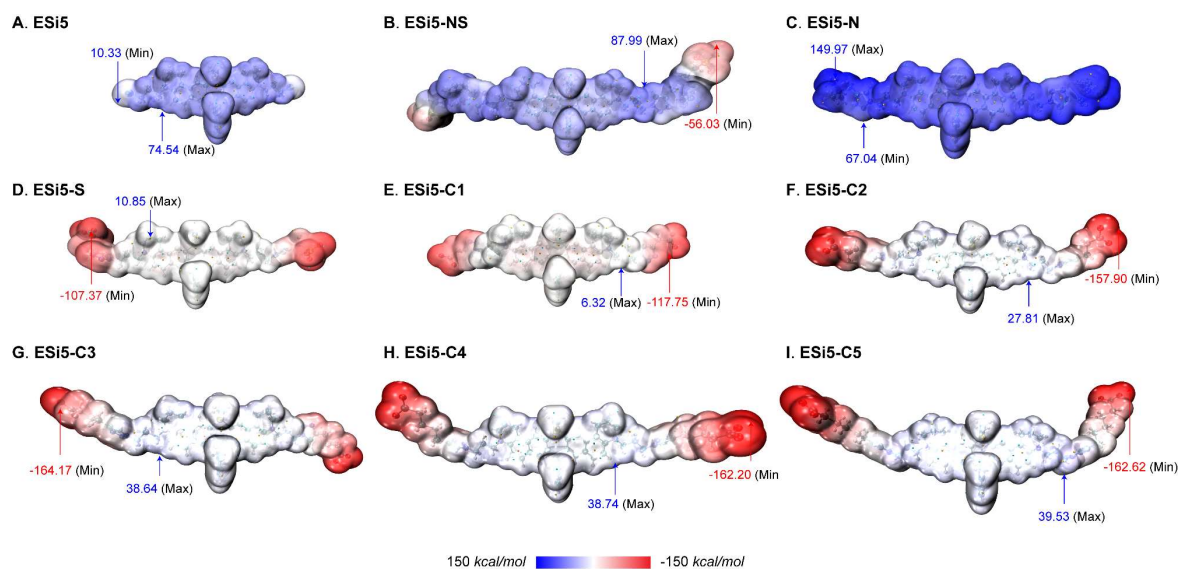

**Supplementary Fig. 3:** Electrostatic potential (ESP) surface of ESi5, ESi5-NS, ESi5-N, ESi5-S and ESi5-C1(-C5) calculated at B3LYP/6-31G level.

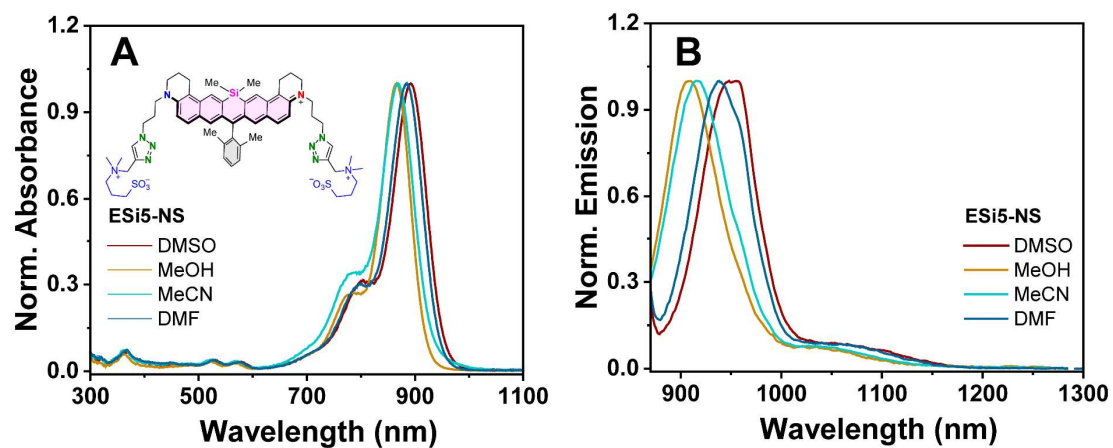

**Supplementary Fig. 4:** The normalized UV-Vis absorption (A) and fluorescence emission (B) spectra of ESi5-NS in different organic solvents, *i.e.* DMSO, MeOH, MeCN, and DMF. Inset: the chemical structure of ESi5-NS.



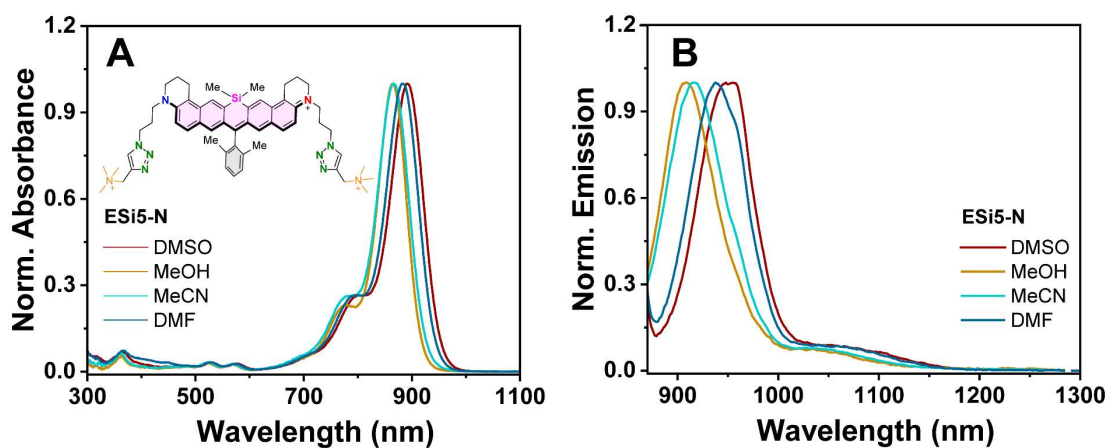

**Supplementary Fig. 5:** The normalized UV-Vis absorption (A) and fluorescence emission (B) spectra of **ESi5-N** in different organic solvents, *i.e.* DMSO, MeOH, MeCN, and DMF. Inset: the chemical structure of **ESi5-N**.

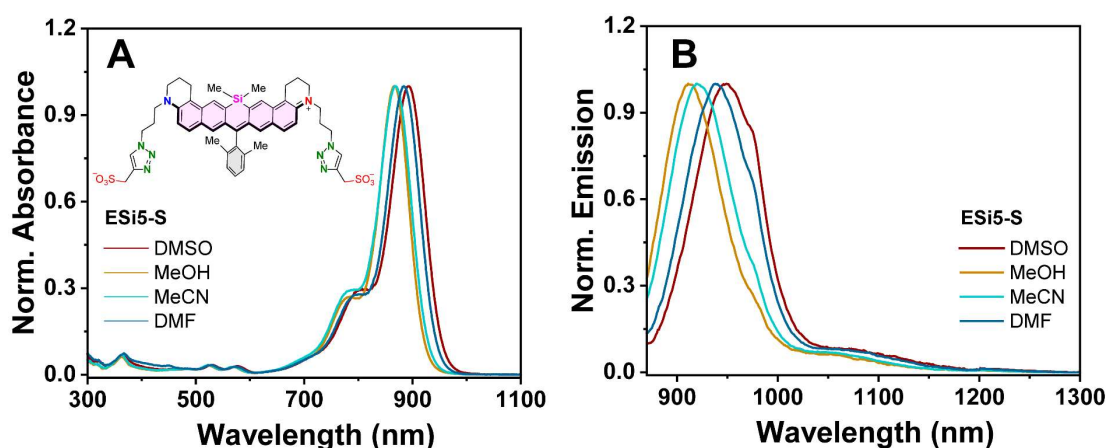

**Supplementary Fig. 6:** The normalized UV-Vis absorption (A) and fluorescence emission (B) spectra of **ESi5-S** in different organic solvents, *i.e.* DMSO, MeOH, MeCN, and DMF. Inset: the chemical structure of **ESi5-S**.

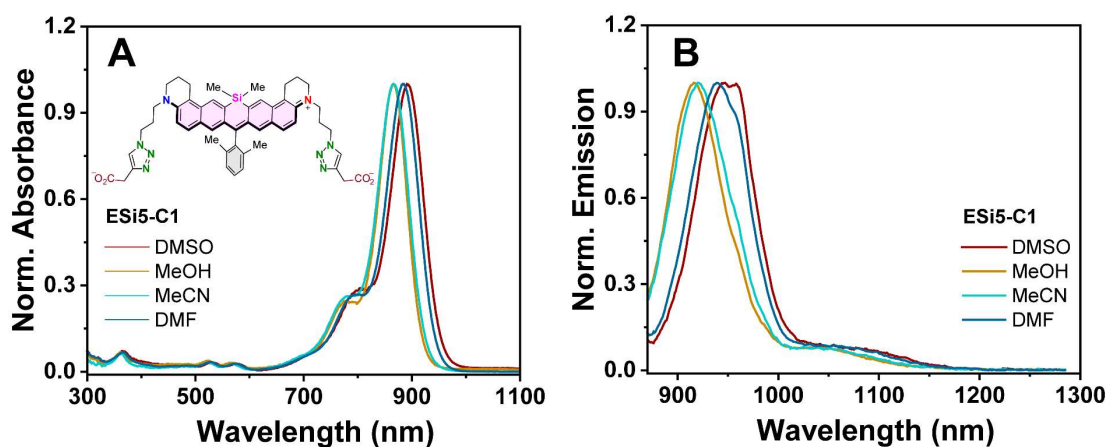

**Supplementary Fig. 7:** The normalized UV-Vis absorption (A) and fluorescence emission (B) spectra of **ESi5-C1** in different organic solvents, *i.e.* DMSO, MeOH, MeCN, and DMF. Inset: the chemical structure of **ESi5-C1**.

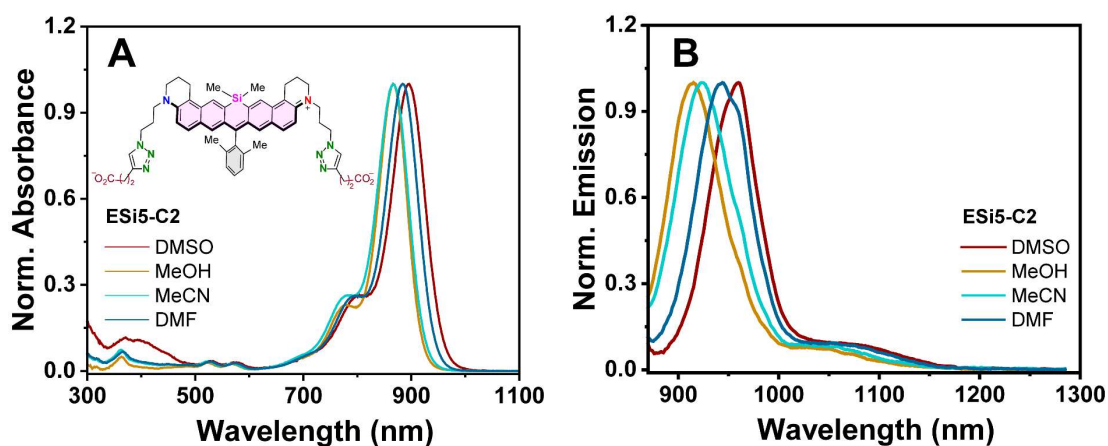

**Supplementary Fig. 8:** The normalized UV-Vis absorption (A) and fluorescence emission (B) spectra of **ESi5-C2** in different organic solvents, *i.e.* DMSO, MeOH, MeCN, and DMF. Inset: the chemical structure of **ESi5-C2**.

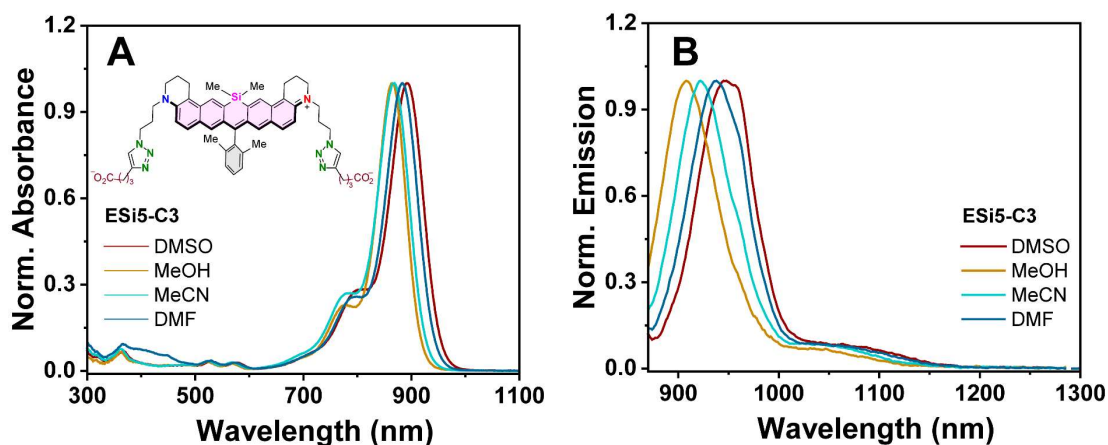

**Supplementary Fig. 9:** The normalized UV-Vis absorption (A) and fluorescence emission (B) spectra of **ESi5-C3** in different organic solvents, *i.e.* DMSO, MeOH, MeCN, and DMF. Inset: the chemical structure of **ESi5-C3**.

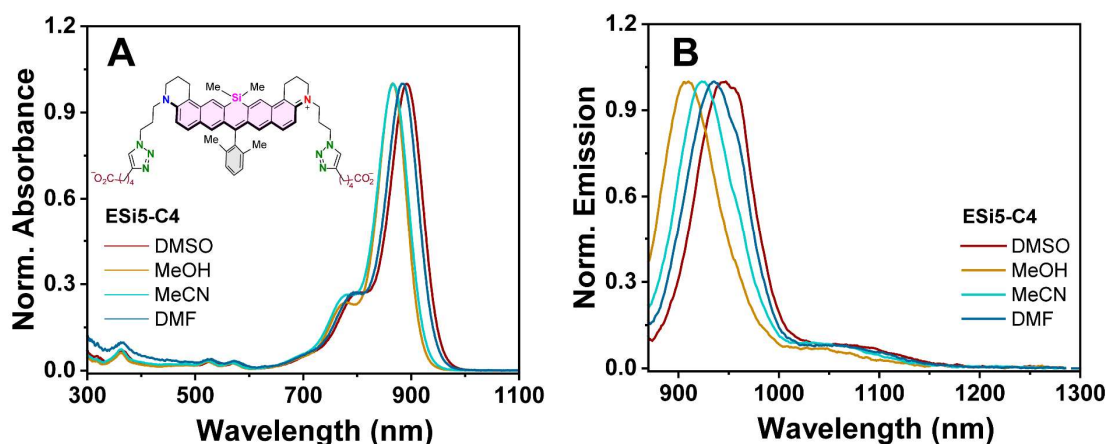

**Supplementary Fig. 10:** The normalized UV-Vis absorption (A) and fluorescence emission (B) spectra of **ESi5-C4** in different organic solvents, *i.e.* DMSO, MeOH, MeCN, and DMF. Inset: the chemical structure of **ESi5-C4**.

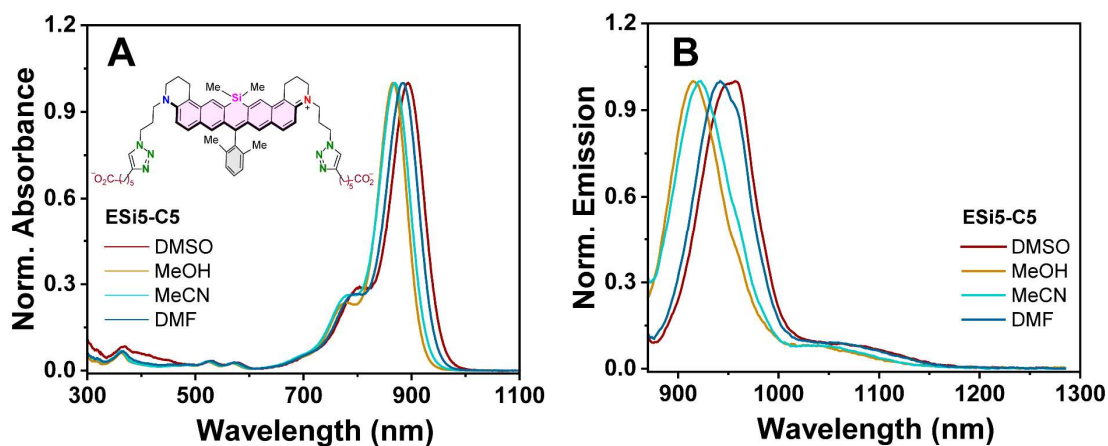

**Supplementary Fig. 11:** The normalized UV-Vis absorption (A) and fluorescence emission (B) spectra of **ESI5-C5** in different organic solvents, *i.e.* DMSO, MeOH, MeCN, and DMF. Inset: the chemical structure of **ESI5-C5**.

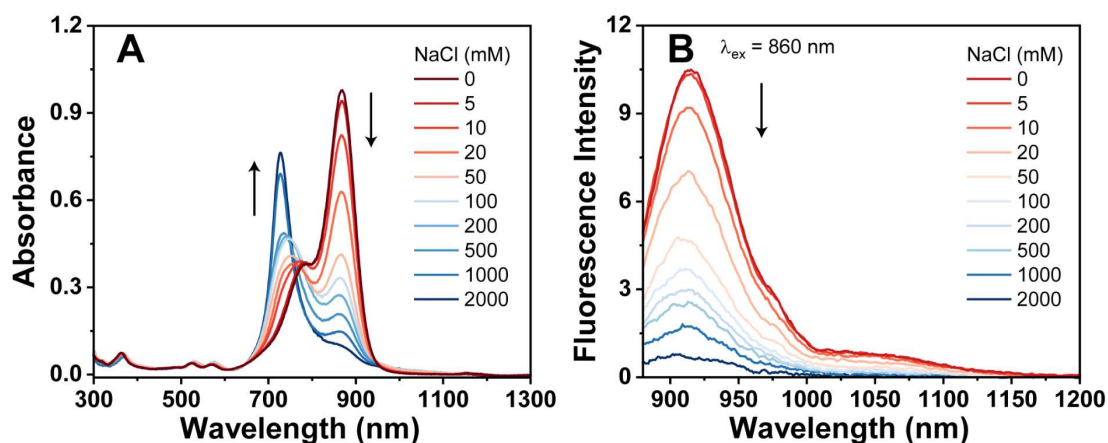

**Supplementary Fig. 12:** The changes of the (A) absorption and (B) fluorescence spectra of **ESI5-NS** in water with respect to the NaCl concentration. ( $\lambda_{\text{ex}} = 860 \text{ nm}$ ).

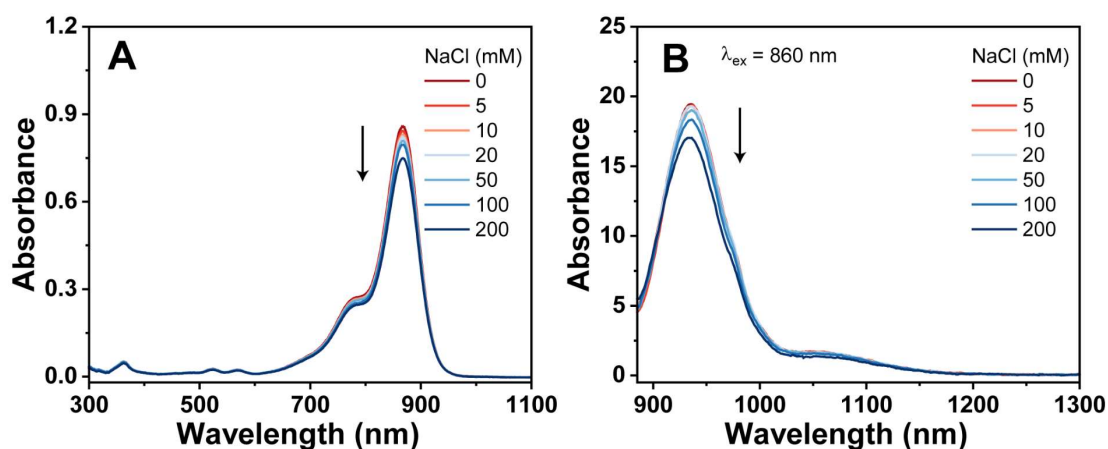

**Supplementary Fig. 13:** The changes of the (A) absorption and (B) fluorescence spectra of **ESI5-N** in water with respect to the NaCl concentration. ( $\lambda_{\text{ex}} = 860 \text{ nm}$ ).

**Supplementary Table 1:** Photophysical parameters of water-soluble ESI5 analogues in different organic solvents, *i.e.* DMSO, MeOH, MeCN, and DMF.

| Dye            | Solvent | $\lambda_{\text{abs}}$<br>(nm) | $\epsilon$<br>( $\times 10^5 \text{ cm}^{-1} \text{ M}^{-1}$ ) | $\lambda_{\text{em}}$<br>(nm) | $\phi$<br>(%) | Stokes Shift<br>(nm) | Brightness<br>( $\text{M}^{-1} \text{ cm}^{-1}$ ) |
|----------------|---------|--------------------------------|----------------------------------------------------------------|-------------------------------|---------------|----------------------|---------------------------------------------------|
| <b>ESI5-NS</b> | DMSO    | 892                            | 1.06                                                           | 946                           | 9.4           | 54                   | 9964                                              |
|                | MeOH    | 866                            | 1.00                                                           | 916                           | 5.4           | 50                   | 5400                                              |
|                | MeCN    | 869                            | 1.01                                                           | 922                           | 7.3           | 53                   | 7373                                              |
|                | DMF     | 885                            | 0.75                                                           | 938                           | 7.3           | 53                   | 5775                                              |
| <b>ESI5-N</b>  | DMSO    | 892                            | 1.03                                                           | 955                           | 8             | 63                   | 8240                                              |
|                | MeOH    | 865                            | 1.16                                                           | 909                           | 5.5           | 44                   | 6380                                              |
|                | MeCN    | 865                            | 1.16                                                           | 916                           | 4.8           | 51                   | 5568                                              |
|                | DMF     | 882                            | 0.40                                                           | 938                           | 4.8           | 56                   | 4800                                              |
| <b>ESI5-S</b>  | DMSO    | 893                            | 2.35                                                           | 949                           | 6.3           | 56                   | 8505                                              |
|                | MeOH    | 868                            | 1.35                                                           | 911                           | 4.1           | 43                   | 5535                                              |
|                | MeCN    | 869                            | 1.32                                                           | 920                           | 8.8           | 51                   | 11616                                             |
|                | DMF     | 885                            | 1.23                                                           | 938                           | 8.8           | 53                   | 9594                                              |
| <b>ESI5-C1</b> | DMSO    | 891                            | 1.23                                                           | 947                           | 8.9           | 56                   | 10578                                             |
|                | MeOH    | 866                            | 1.58                                                           | 916                           | 5.2           | 50                   | 8216                                              |
|                | MeCN    | 865                            | 0.92                                                           | 920                           | 9.2           | 56                   | 8464                                              |
|                | DMF     | 883                            | 0.64                                                           | 939                           | 9.2           | 56                   | 3712                                              |
| <b>ESI5-C2</b> | DMSO    | 896                            | 1.23                                                           | 960                           | 8.9           | 64                   | 10947                                             |
|                | MeOH    | 867                            | 1.48                                                           | 915                           | 5.0           | 48                   | 7400                                              |
|                | MeCN    | 866                            | 1.01                                                           | 924                           | 6.0           | 58                   | 6060                                              |
|                | DMF     | 884                            | 1.23                                                           | 944                           | 8.6           | 60                   | 10578                                             |
| <b>ESI5-C3</b> | DMSO    | 892                            | 0.88                                                           | 956                           | 8.6           | 64                   | 7568                                              |
|                | MeOH    | 865                            | 1.42                                                           | 908                           | 6.0           | 43                   | 8520                                              |
|                | MeCN    | 869                            | 1.27                                                           | 922                           | 9.0           | 53                   | 11430                                             |
|                | DMF     | 884                            | 0.77                                                           | 938                           | 9.0           | 54                   | 6160                                              |
| <b>ESI5-C4</b> | DMSO    | 894                            | 0.89                                                           | 957                           | 9.4           | 63                   | 8366                                              |
|                | MeOH    | 865                            | 1.36                                                           | 915                           | 4.9           | 50                   | 6664                                              |
|                | MeCN    | 868                            | 0.96                                                           | 922                           | 6.3           | 54                   | 6048                                              |
|                | DMF     | 885                            | 0.32                                                           | 942                           | 6.3           | 57                   | 1824                                              |
| <b>ESI5-C5</b> | DMSO    | 894                            | 0.89                                                           | 957                           | 9.4           | 63                   | 8366                                              |
|                | MeOH    | 865                            | 1.36                                                           | 915                           | 4.9           | 50                   | 6664                                              |
|                | MeCN    | 868                            | 0.96                                                           | 922                           | 6.3           | 54                   | 6048                                              |
|                | DMF     | 885                            | 0.32                                                           | 942                           | 6.3           | 57                   | 1824                                              |

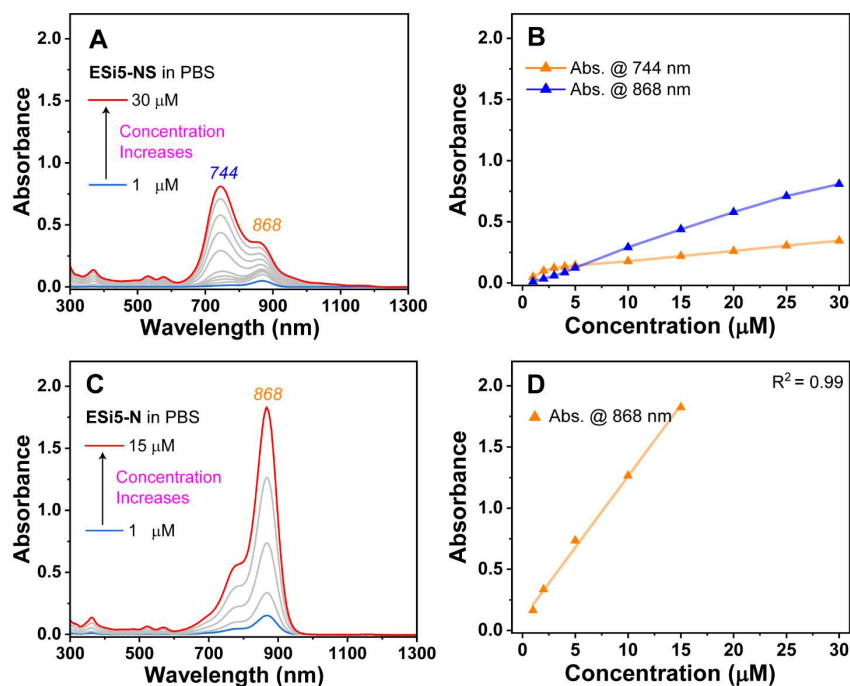

**Supplementary Fig. 14:** Concentration-dependent absorption spectra of **ESi5-NS** (A), **ESi5-N** (C) and **ESi5-S** (E) in PBS (pH = 7.4, 10 mM, containing MeOH < 2%) at room temperature. Plot of absorbance versus concentration at specific wavelengths of **ESi5-NS** (B), **ESi5-N** (D) and **ESi5-S** (F).

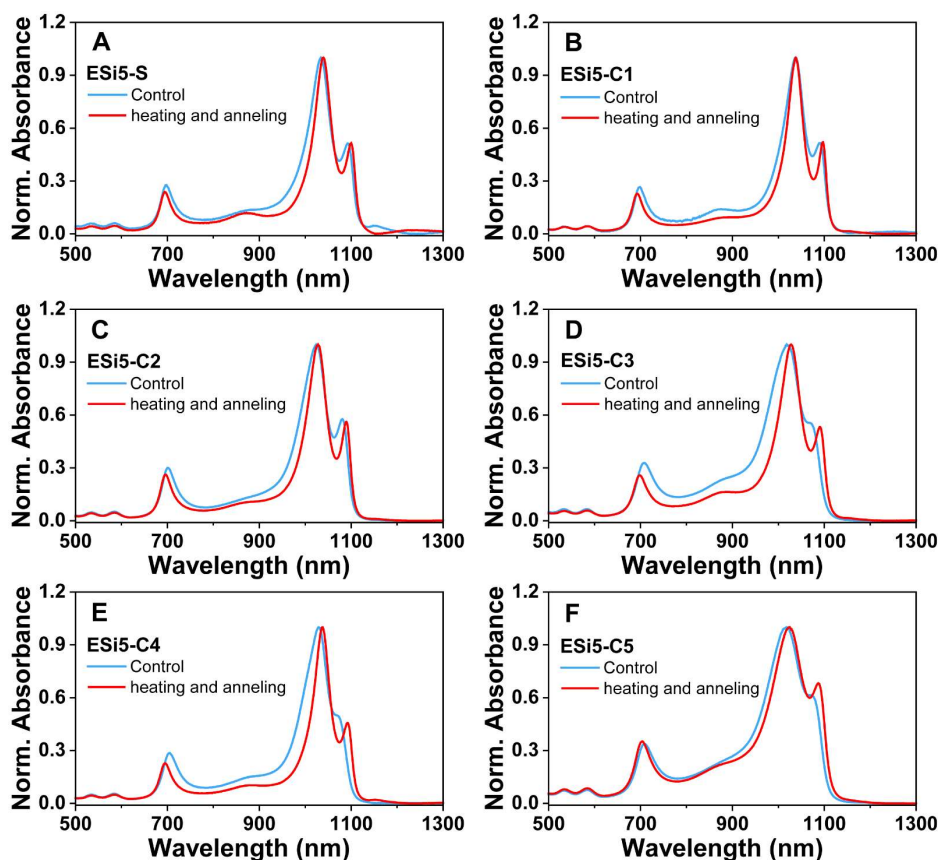

**Supplementary Fig. 15:** The Normalized absorption spectra of **ESi5-S**, **ESi5-C1(-C5)** in PBS (pH = 7.4, 10 mM) (blue line) and after thermal annealing (red line).



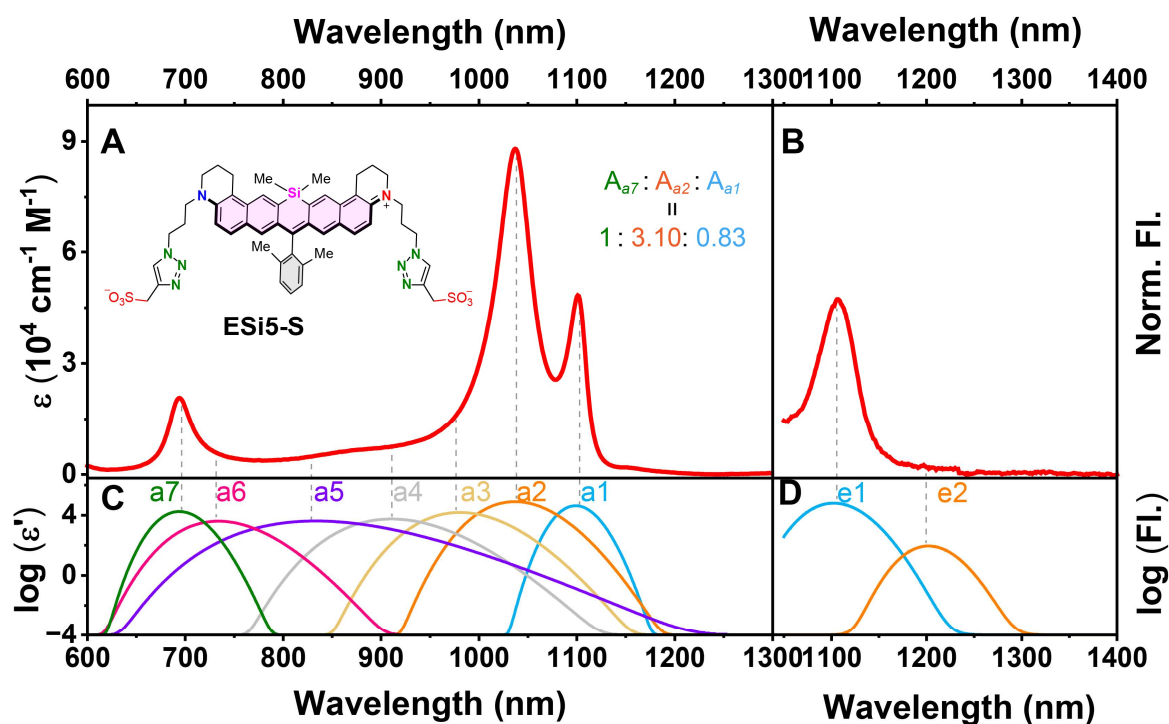

**Supplementary Fig. 16:** The absorption (A) and fluorescence emission (B) spectra of the heating/annealing-treated **ESi5-S** agg in PBS (pH =7.4, 10 mM). And the absorption and emission were deconvoluted into seven (C) and two (D) constituting peaks, respectively.

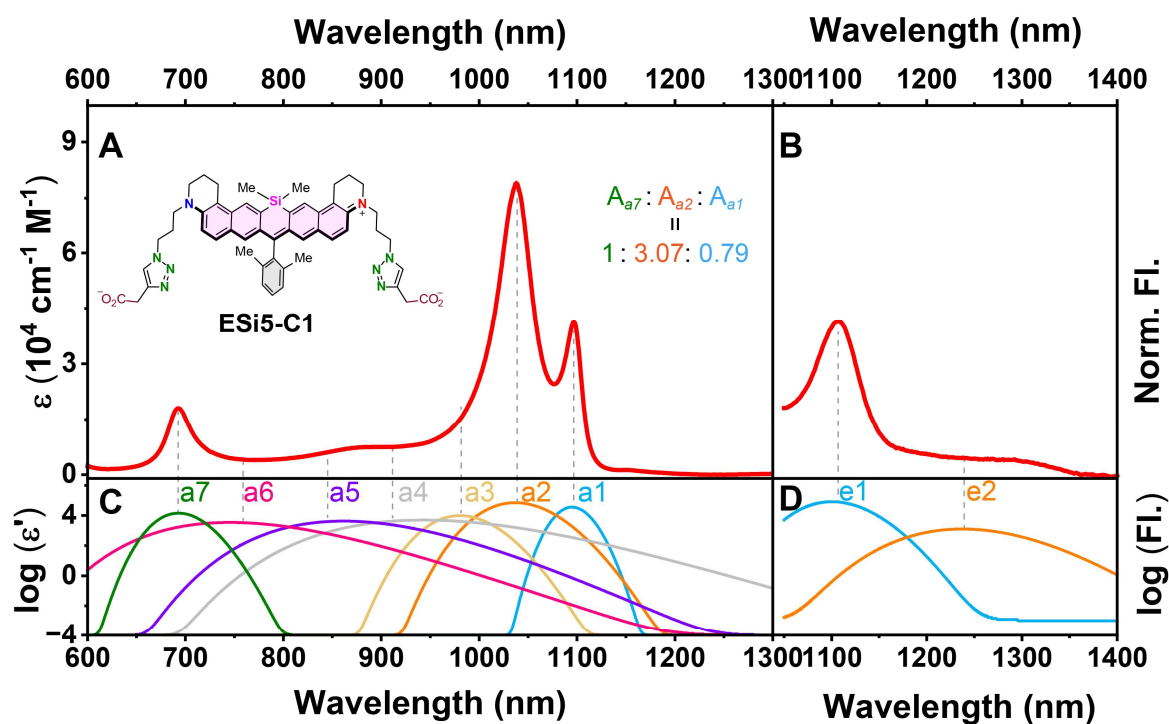

**Supplementary Fig. 17:** The absorption (A) and fluorescence emission (B) spectra of the heating/annealing-treated **ESi5-C1** agg in PBS (pH =7.4, 10 mM). And the absorption and emission were deconvoluted into seven (C) and two (D) constituting peaks, respectively.

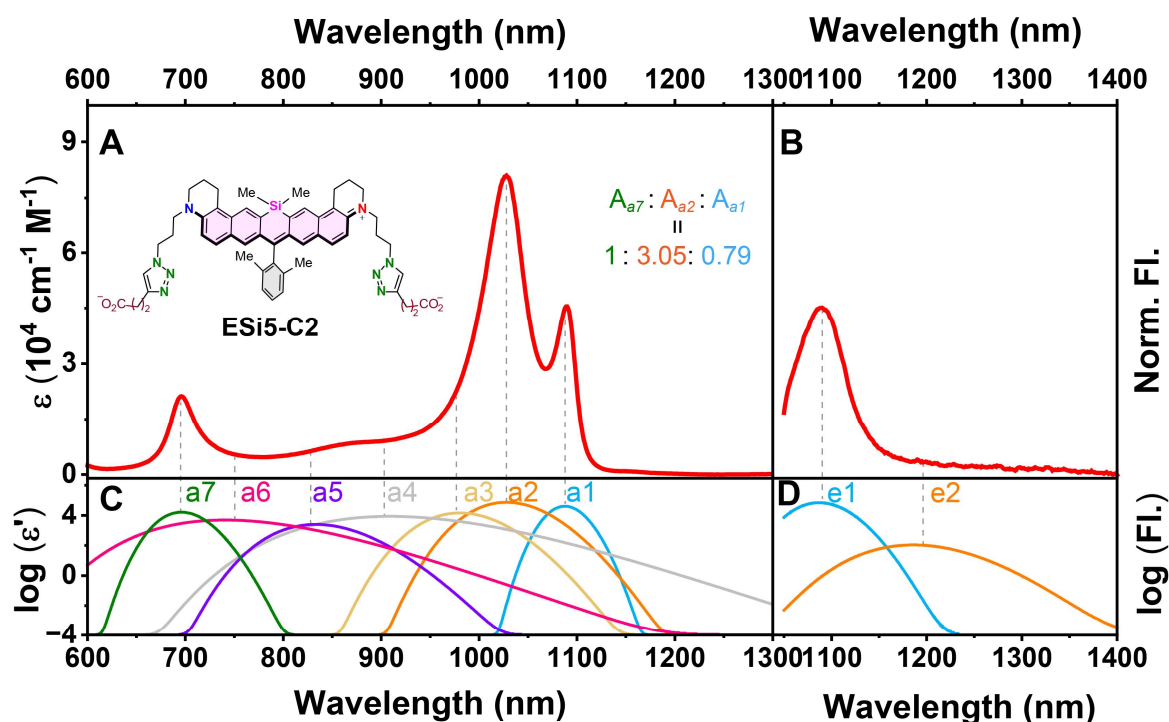

**Supplementary Fig. 18:** The absorption (A) and fluorescence emission (B) spectra of the heating/annealing-treated **ESI5-C2 agg** in PBS (pH = 7.4, 10 mM). And the absorption and emission were deconvoluted into seven (C) and two (D) constituting peaks, respectively.

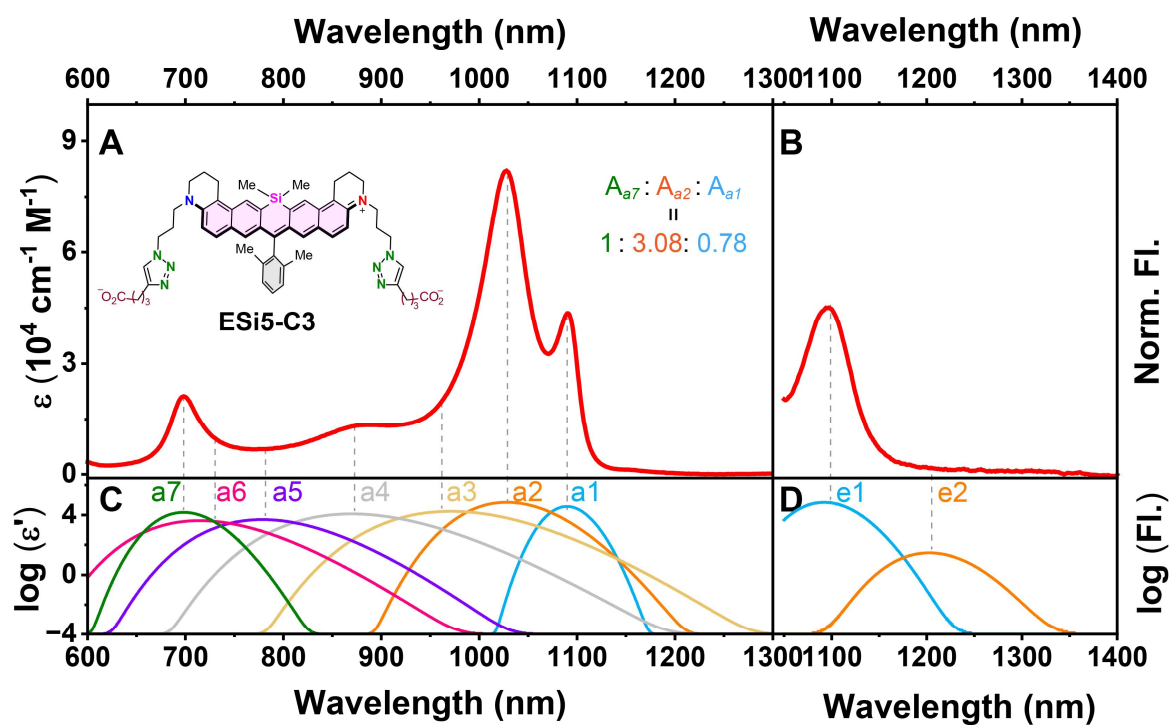

**Supplementary Fig. 19:** The absorption (A) and fluorescence emission (B) spectra of the heating/annealing-treated **ESI5-C3 agg** in PBS (pH = 7.4, 10 mM). And the absorption and emission were deconvoluted into seven (C) and two (D) constituting peaks, respectively.



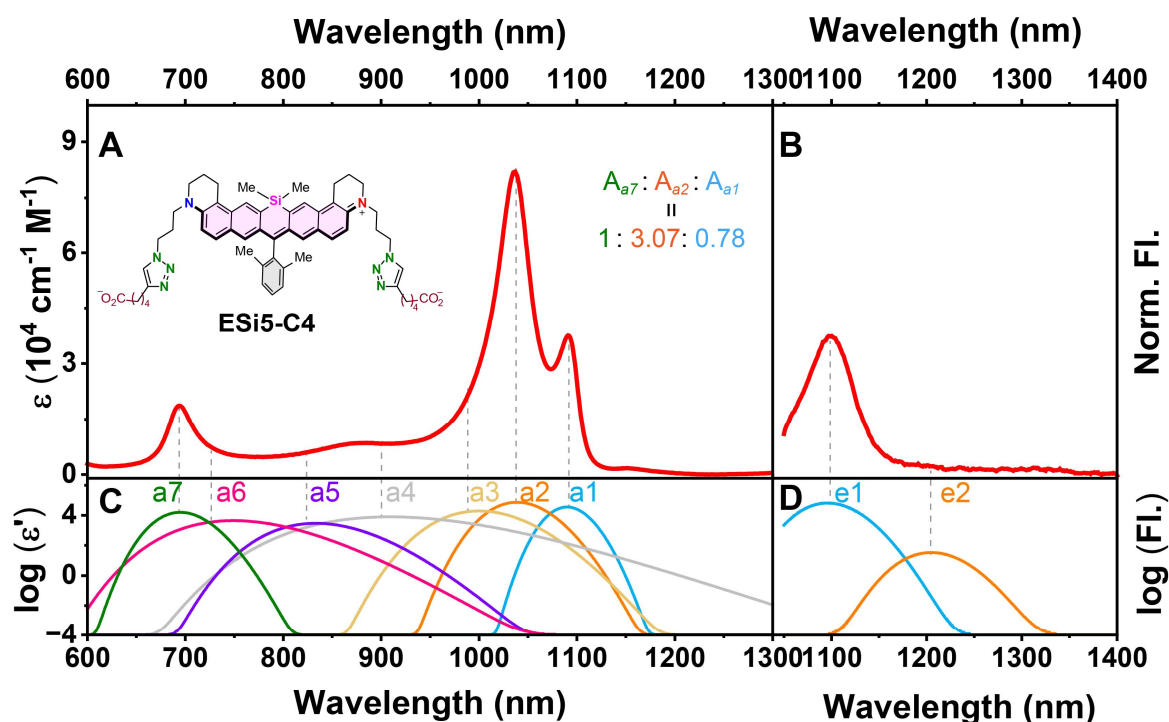

**Supplementary Fig. 20:** The absorption (A) and fluorescence emission (B) spectra of the heating/annealing-treated **ESI5-C4 agg** in PBS (pH =7.4, 10 mM). And the absorption and emission were deconvoluted into seven (C) and two (D) constituting peaks, respectively.

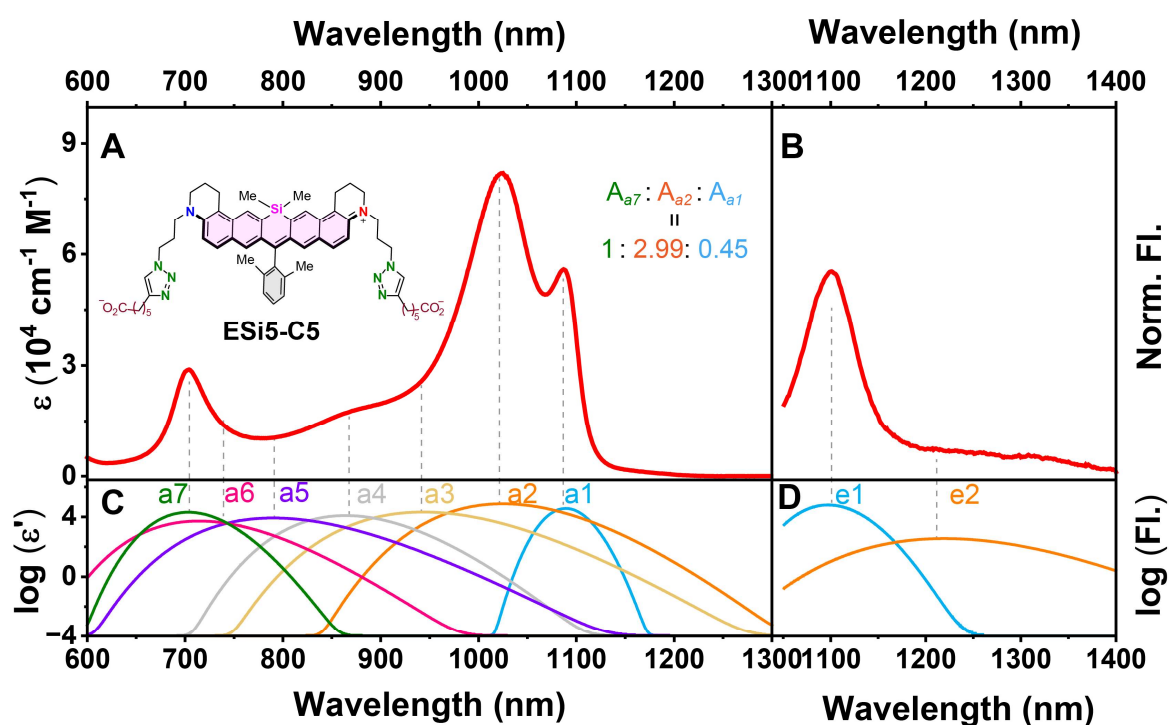

**Supplementary Fig. 21:** The absorption (A) and fluorescence emission (B) spectra of the heating/annealing-treated **ESI5-C5 agg** in PBS (pH =7.4, 10 mM). The absorption and emission were deconvoluted into seven (C) and two (D) constituting peaks, respectively.

**Supplementary Table 2:** The spectral deconvolution parameters of heating/annealing-treated **ESi5-S** and **ESi5-C1(-C5) agg** in PBS (pH =7.4, 10 mM).

| Dye            | Peak | Wavelength (nm) | FWHM (cm <sup>-1</sup> ) | Area (10 <sup>7</sup> L mol <sup>-1</sup> cm <sup>-2</sup> ) |
|----------------|------|-----------------|--------------------------|--------------------------------------------------------------|
| <b>ESi5-S</b>  | a1   | 1099            | 224.8                    | 1.03                                                         |
|                | a2   | 1037            | 448.3                    | 3.85                                                         |
|                | a7   | 694             | 657.4                    | 1.24                                                         |
| <b>ESi5-C1</b> | a1   | 1094            | 216.2                    | 0.84                                                         |
|                | a2   | 1038            | 420.7                    | 3.25                                                         |
|                | a7   | 692             | 692.9                    | 1.06                                                         |
| <b>ESi5-C2</b> | a1   | 1088            | 229.3                    | 1.00                                                         |
|                | a2   | 1028            | 483.3                    | 3.84                                                         |
|                | a7   | 696             | 721.0                    | 1.26                                                         |
| <b>ESi5-C3</b> | a1   | 1089            | 254.5                    | 1.03                                                         |
|                | a2   | 1028            | 512.8                    | 4.09                                                         |
|                | a7   | 697             | 817.8                    | 1.33                                                         |
| <b>ESi5-C4</b> | a1   | 1090            | 232.0                    | 0.88                                                         |
|                | a2   | 1037            | 413.0                    | 3.47                                                         |
|                | a7   | 695             | 715.8                    | 1.13                                                         |
| <b>ESi5-C5</b> | a1   | 1089            | 245.5                    | 0.96                                                         |
|                | a2   | 1025            | 790.2                    | 6.34                                                         |
|                | a7   | 703             | 973.6                    | 2.12                                                         |

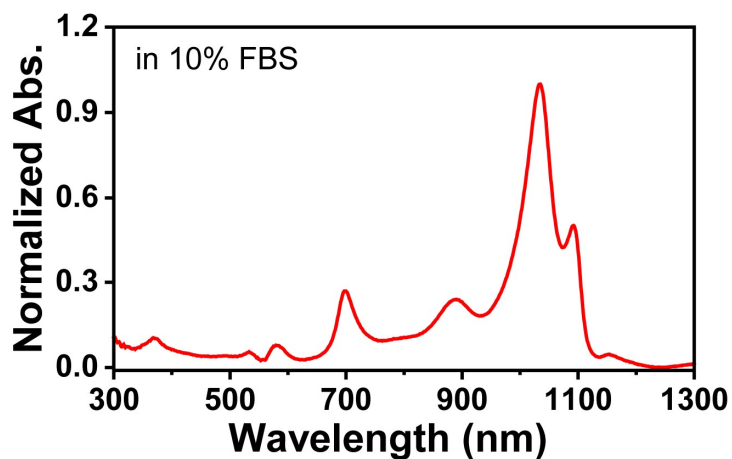

**Supplementary Fig. 22:** The absorption spectrum of **ESi5-S agg** in PBS (5 μM), containing 10% FBS.

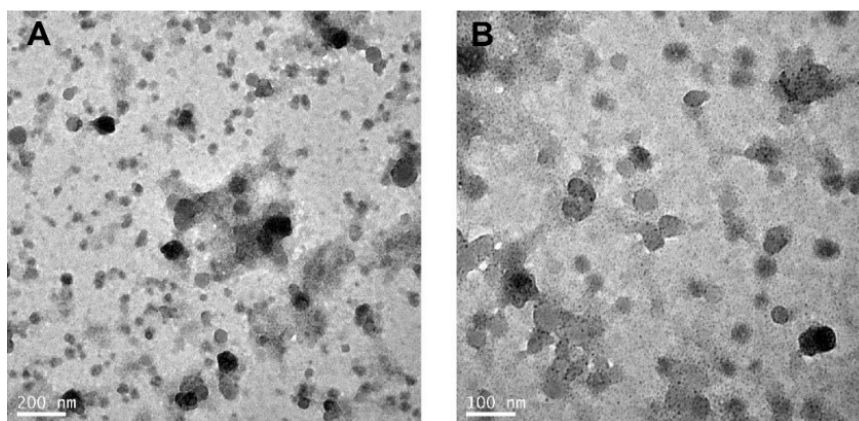

**Supplementary Fig. 23:** (A, B) The TEM images of **ESI5-NS agg** (200  $\mu$ M) in PBS (pH = 7.4, 10 mM). Scale bar =200 nm and 100 nm, respectively.

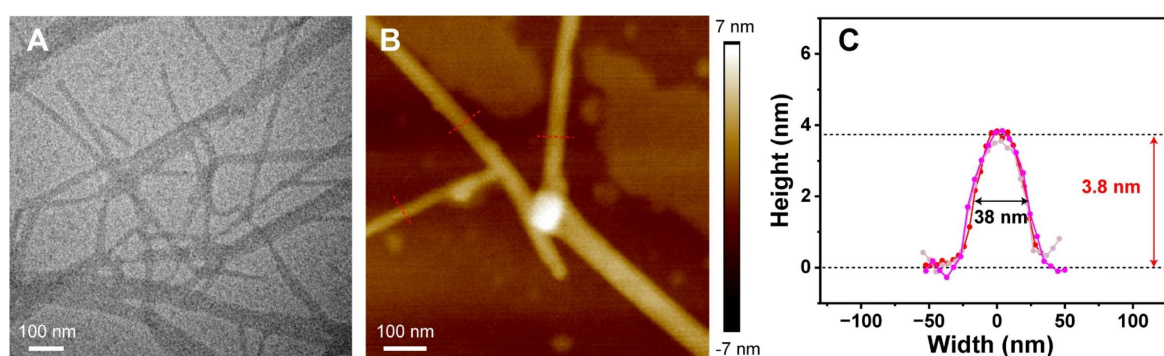

**Supplementary Fig. 24:** (A) The TEM image of **ESI5-C1 agg** (200  $\mu$ M) in deionized water (containing 4% methanol). (B, C) The AFM image of **ESI5-C1 agg** (200  $\mu$ M) with cross-section height analyses along red dash lines. Scale bar = 100 nm.

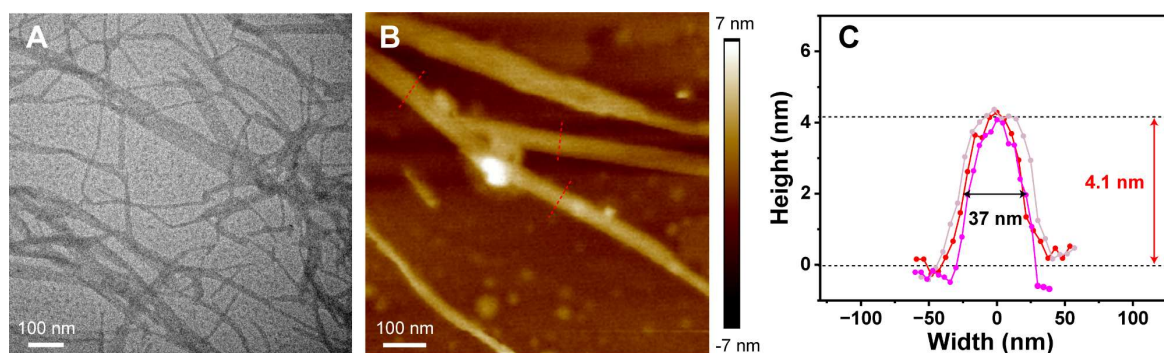

**Supplementary Fig. 25:** (A) The TEM image of **ESI5-C2 agg** (200  $\mu$ M) in deionized water (containing 4% methanol). (B, C) The AFM image of **ESI5-C2 agg** (200  $\mu$ M) with cross-section height analyses along red dash lines. Scale bar = 100 nm.



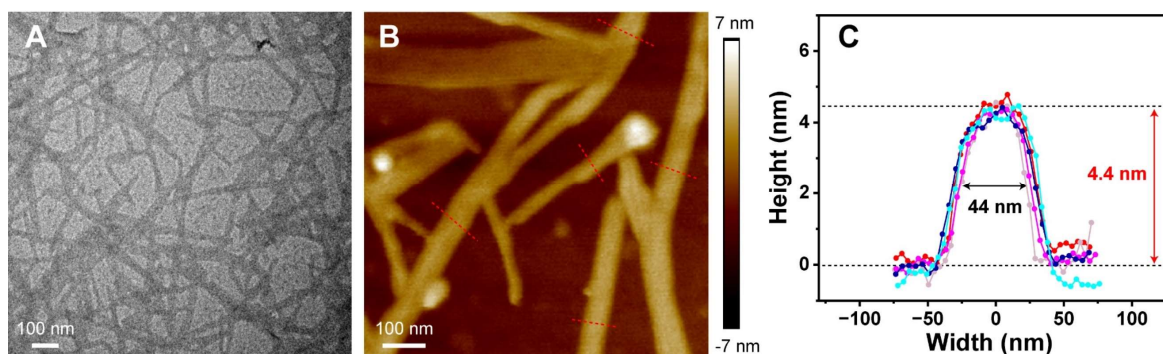

**Supplementary Fig. 26:** (A) The TEM image of **ESI5-C3 agg** (200  $\mu$ M) in deionized water (containing 4% methanol). (B, C) The AFM image of **ESI5-C3 agg** (200  $\mu$ M) with cross-section height analyses along red dash lines. Scale bar = 100 nm.

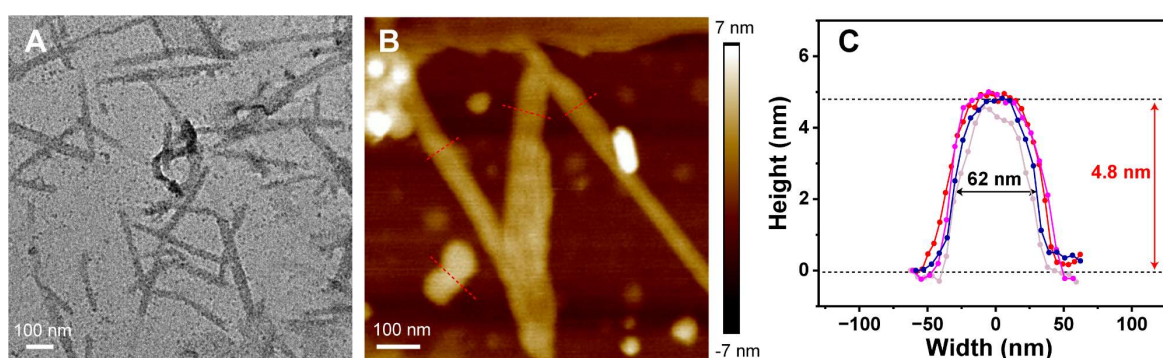

**Supplementary Fig. 27:** (A) The TEM image of **ESI5-C4 agg** (200  $\mu$ M) in deionized water (containing 4% methanol). (B, C) The AFM image of **ESI5-C4 agg** (200  $\mu$ M) with cross-section height analyses along red dash lines. Scale bar = 100 nm.

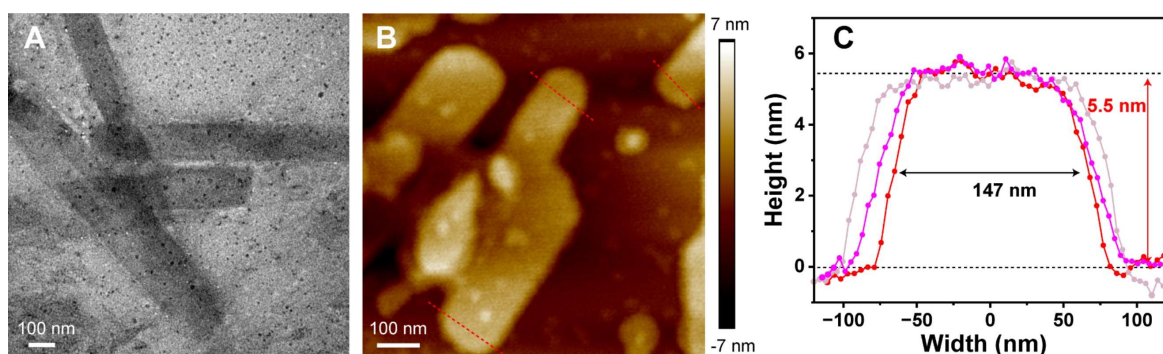

**Supplementary Fig. 28:** (A) The TEM image of **ESI5-C5 agg** (200  $\mu$ M) in deionized water (containing 4% methanol). (B, C) The AFM image of **ESI5-C5 agg** (200  $\mu$ M) with cross-section height analyses along red dash lines. Scale bar = 100 nm.

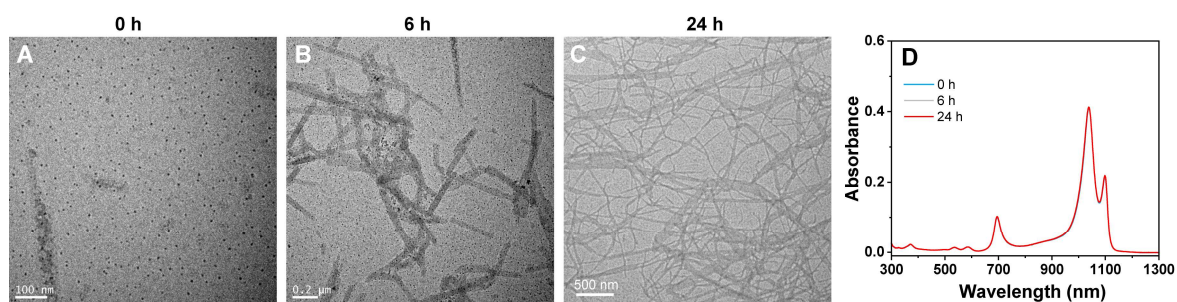

**Supplementary Fig. 29:** (A, B, C) The TEM images and (D) absorbance spectrum of **ESI5-S agg** (200 μM in H<sub>2</sub>O, containing 4% MeOH) self-assembled for 0 h, 6 h and 24 h, respectively.

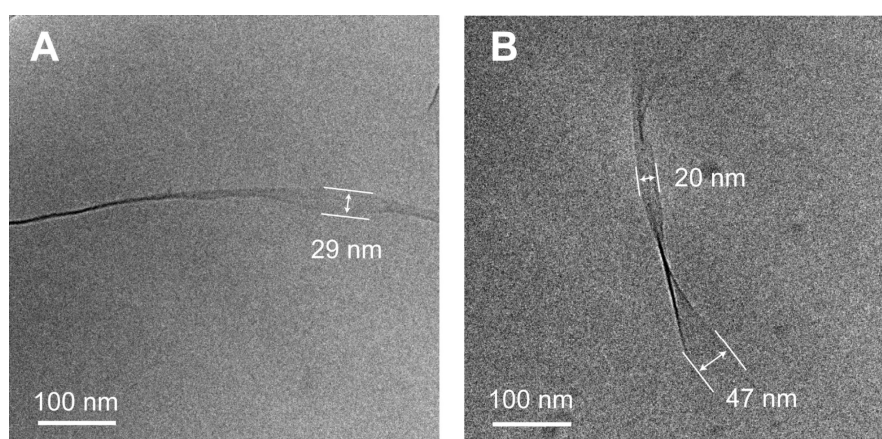

**Supplementary Fig. 30:** (A, B) The Cryo-EM images of **ESI5-S agg** (200 μM) in deionized H<sub>2</sub>O (containing 4% methanol). Scale bar = 100 nm.

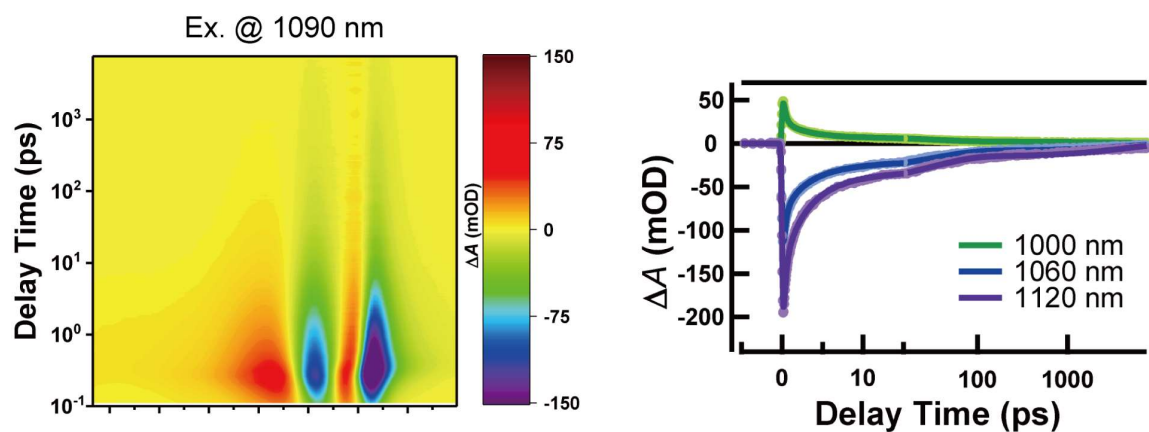

**Supplementary Fig. 31:** Femtosecond transient absorption (fs-TA) spectra of **ESI5-S agg** (10 μM) in PBS (pH = 7.4, 10 mM) ( $\lambda_{\text{pump}} = 1090 \text{ nm}$ )

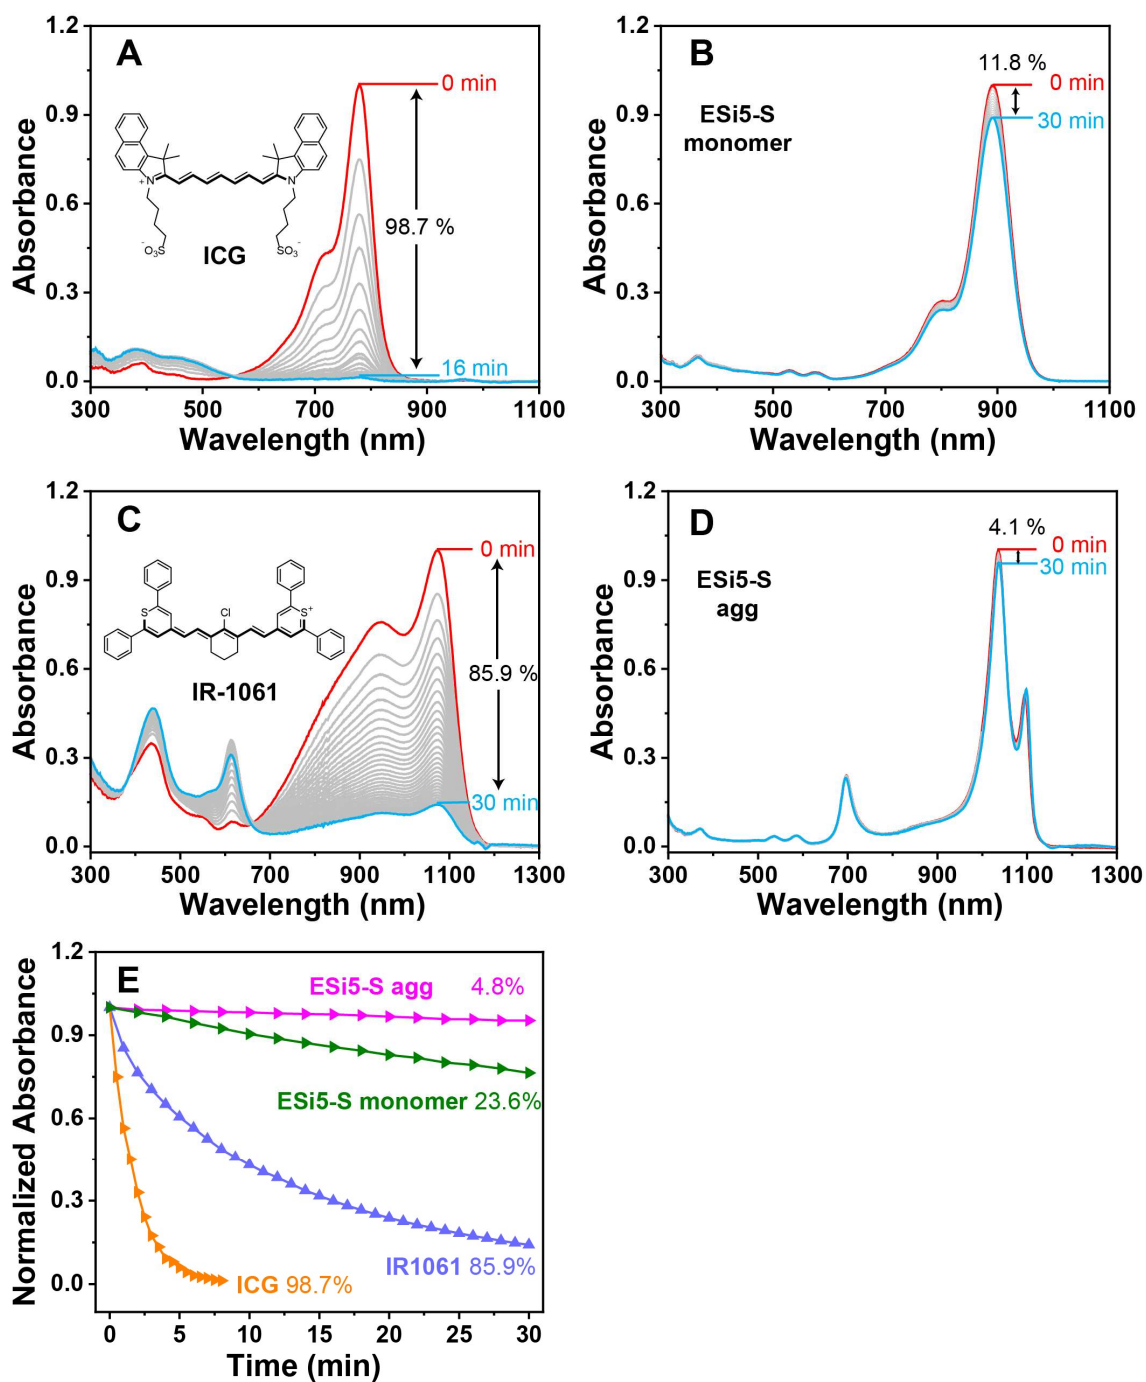

**Supplementary Fig. 32:** (A-D) Photo-stability tests of **ICG** in DMSO ( $Abs_{808}=0.2$ , 808 nm,  $500 \text{ mW}\cdot\text{cm}^{-2}$ ), **ESi5-S monomer** in DMSO ( $Abs_{808}=0.2$ , 808 nm,  $500 \text{ mW}\cdot\text{cm}^{-2}$ ), **IR-1061** in DMSO ( $Abs_{1064}=0.2$ , 1064 nm,  $500 \text{ mW}\cdot\text{cm}^{-2}$ ) and **ESi5-S agg** ( $Abs_{1064}=0.2$ , 1064 nm,  $500 \text{ mW}\cdot\text{cm}^{-2}$ ). (E) Absorbance decay at the absorption maximum with respect to irradiation duration.



**Supplementary Table 3:** The photobleaching rates and the bleaching half-life ( $\tau_{1/2}$ ) of ICG, ESI5-S monomer, IR-1061 and ESI5-S agg. The bleaching half-life ( $\tau_{1/2}$ ) were calculated via fitting to an exponential decay Equation:  $y = A_1 \times e^{(-x/\tau_{1/2})} + y_0$

|                | Photobleaching Rates | $\tau_{1/2}$ | R <sup>2</sup> |
|----------------|----------------------|--------------|----------------|
| ICG            | 98.7%                | 3.560        | 0.999          |
| ESI5-S monomer | 11.8%                | 46.143       | 0.999          |
| IR-1061        | 85.9%                | 10.297       | 0.995          |
| ESI5-S agg     | 4.1%                 | ~2636        | 0.998          |

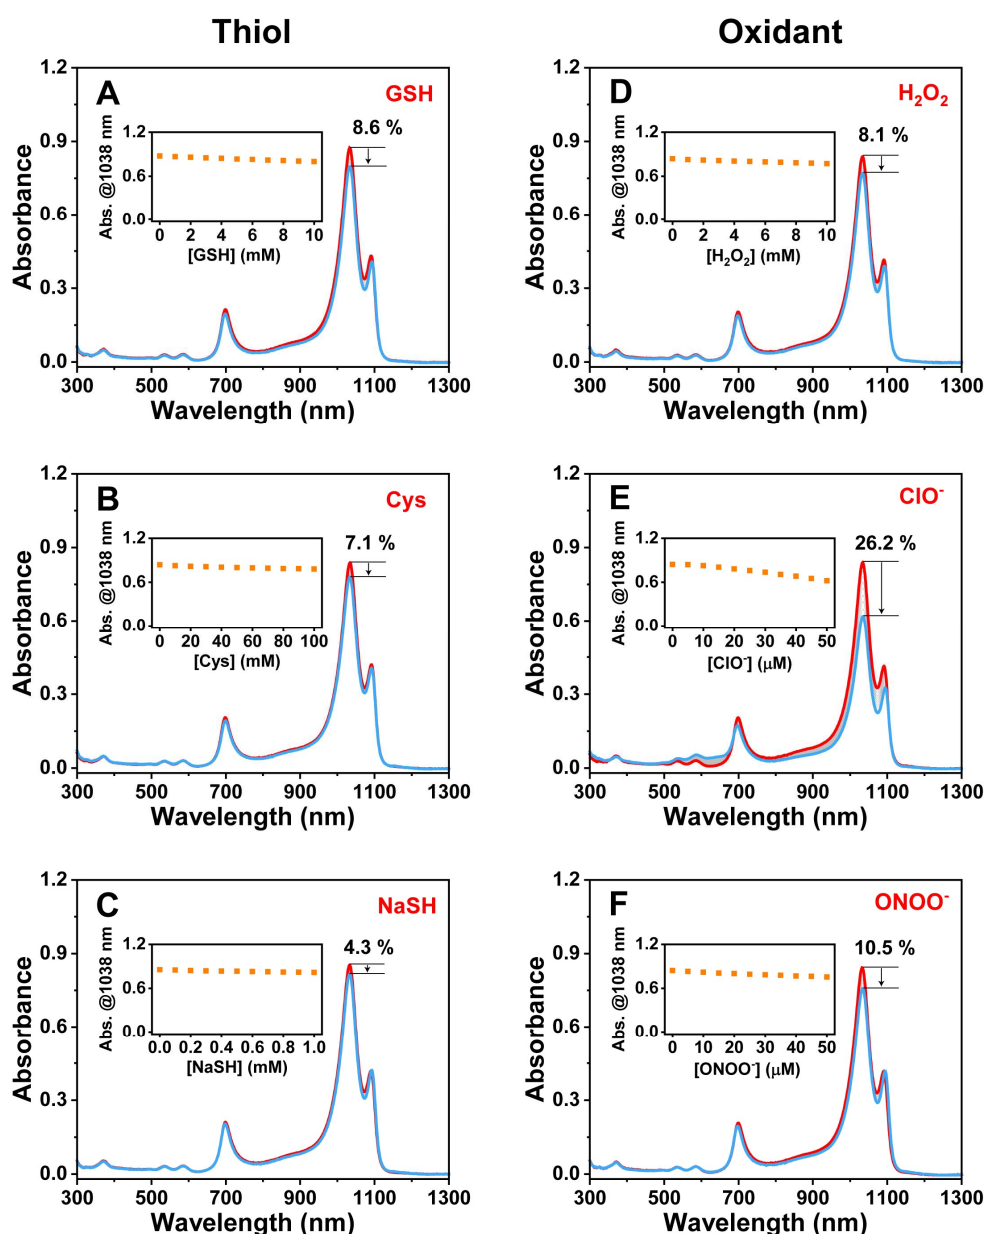

**Supplementary Fig. 33:** The chemo-stability of ESI5-S agg against (A) GSH, (B) Cys, (C) NaHS, (D) H<sub>2</sub>O<sub>2</sub>, (E) ClO<sup>-</sup>, and (F) ONOO<sup>-</sup> in PBS buffer (pH = 7.4, 10 mM).



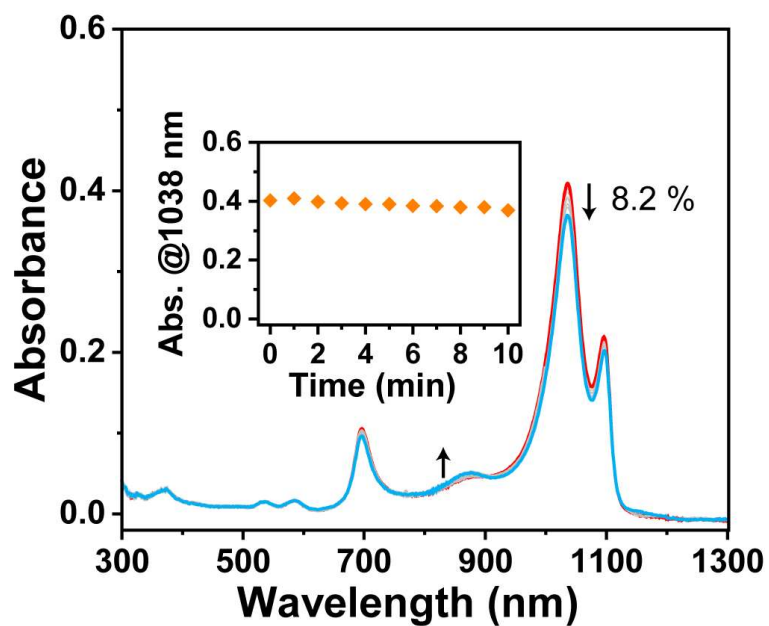

**Supplementary Fig. 34:** The absorption spectra of ESI5-S agg (5  $\mu$ M) in PBS (pH = 7.4, 10 mM) sonicated for 1-10 min.

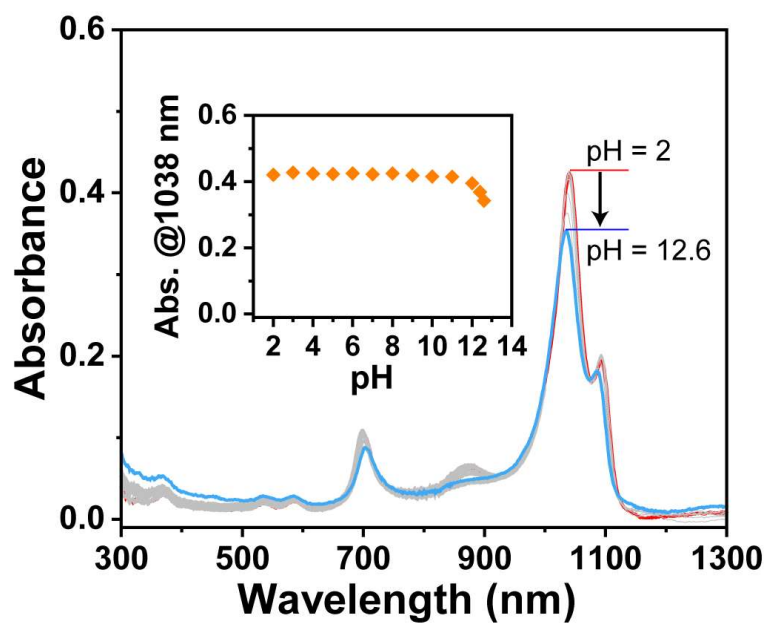

**Supplementary Fig. 35:** The pH stability of ESI5-S agg (5  $\mu$ M).

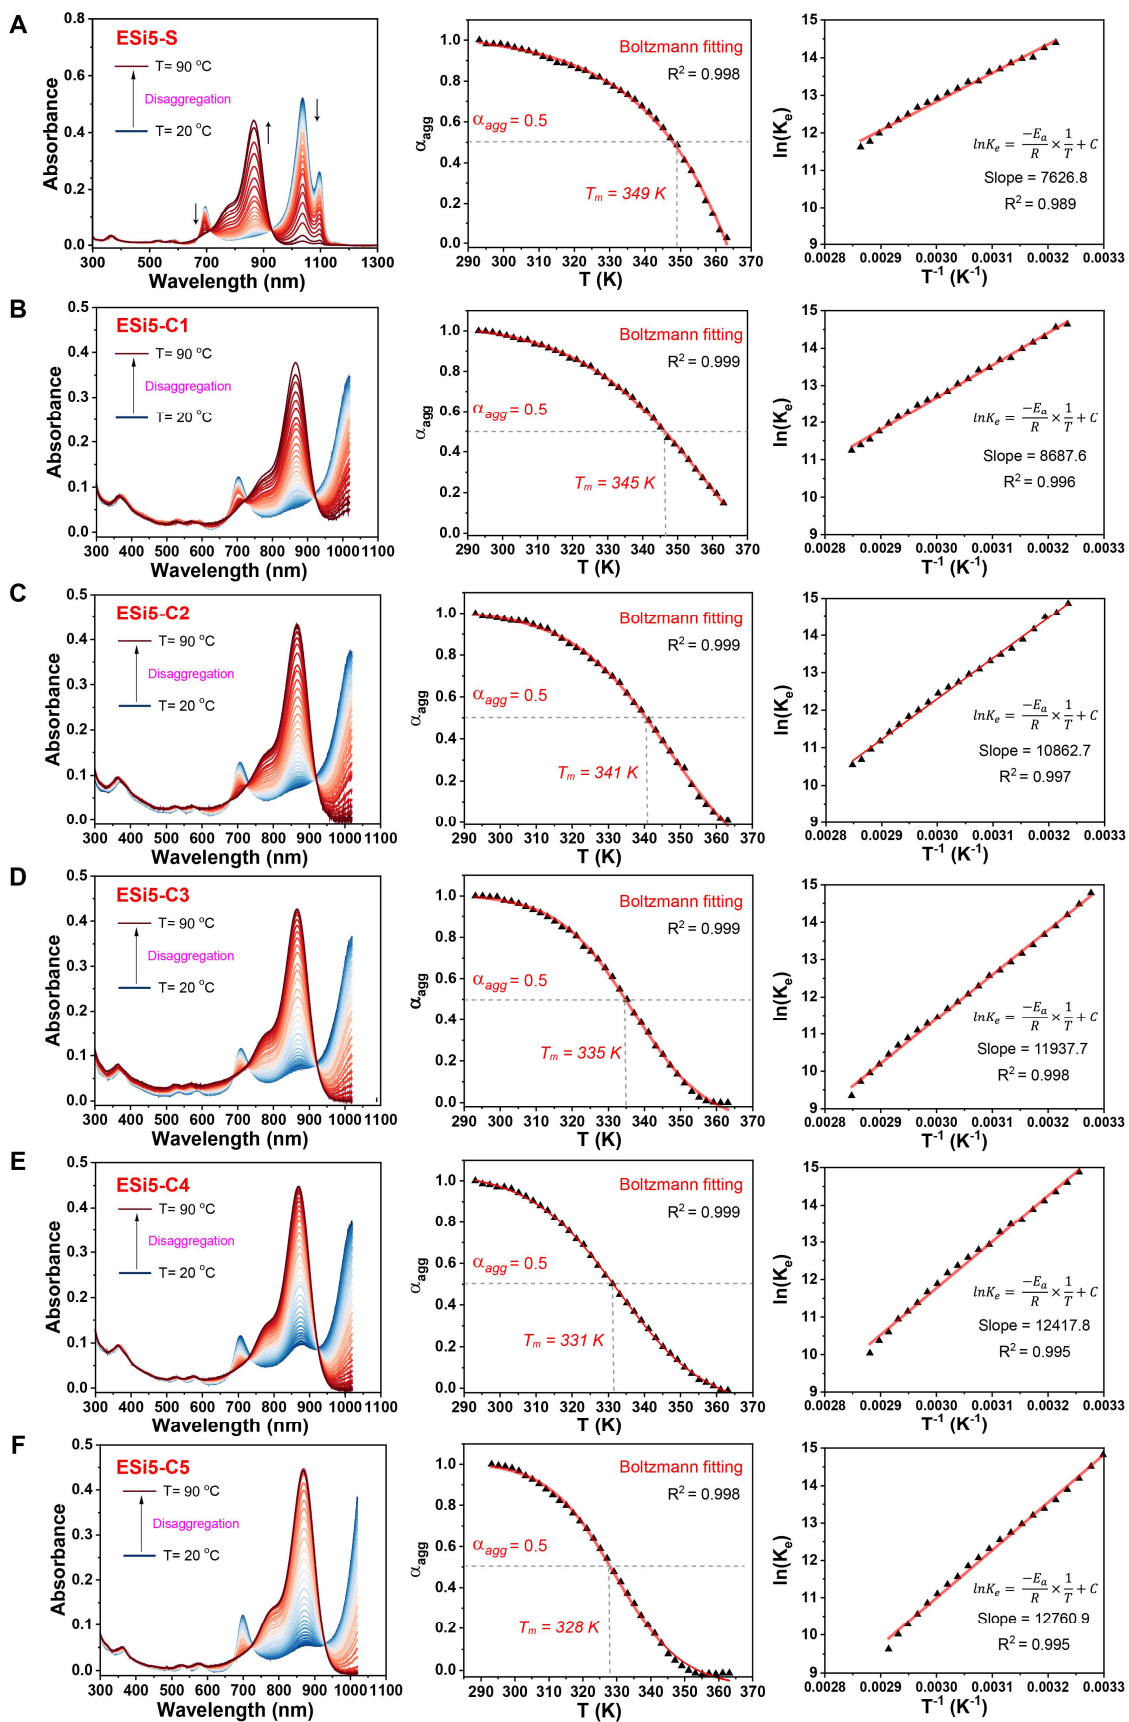

**Supplementary Fig. 36:** Temperature-dependent stability of (A) ESi5-S agg (5  $\mu\text{M}$ ), (B) ESi5-C1 agg (5  $\mu\text{M}$ ), (C) ESi5-C2 agg (5  $\mu\text{M}$ ), (D) ESi5-C3 agg (5  $\mu\text{M}$ ), (E) ESi5-C4 agg (5  $\mu\text{M}$ ), and (F) ESi5-C5 agg (5  $\mu\text{M}$ ), in PBS (pH = 7.4, 10 mM) with 5% methanol. Left: temperature-

dependent absorption spectra between 293 K and 363 K; middle: Boltzmann fit ( $y = A_2 + (A_1 - A_2) / (1 + \exp((x - x_0)/dx))$ ) of the fraction of aggregate ( $\alpha_{agg}$ ) as function of temperature; right:  $\ln(K_e)$  as function of  $1/T$ . The Slope is equal to  $-E_a/R$ , where  $E_a$  is the activation energy and  $R$  is the gas constant.

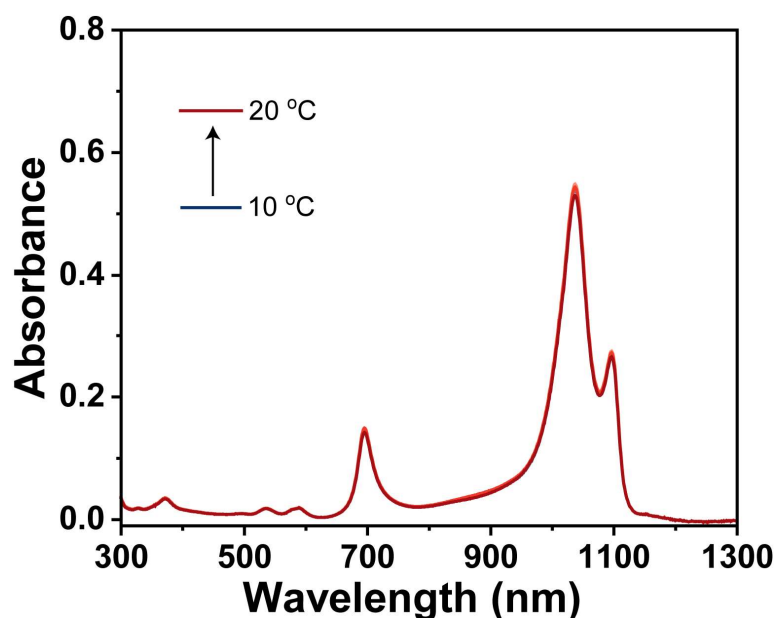

**Supplementary Fig. 37:** The UV-Vis absorption spectra of a solution of **ESi5-S agg** ( $5 \mu\text{M}$  in PBS, containing 5% methanol) at different temperature (10 °C to 20 °C).

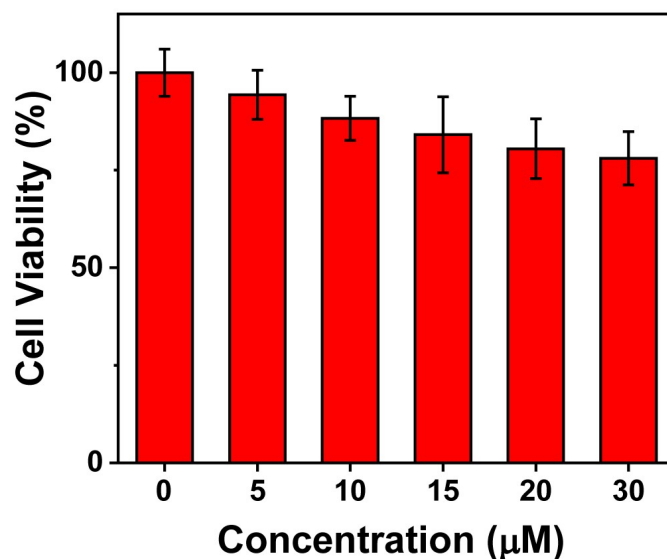

**Supplementary Fig. 38:** Viability of HeLa cells upon incubation with different concentration of **ESi5-S agg** (0-30  $\mu\text{M}$ ) for 24 hrs. ( $n=6$ , Data are presented as mean values  $\pm$  SD)

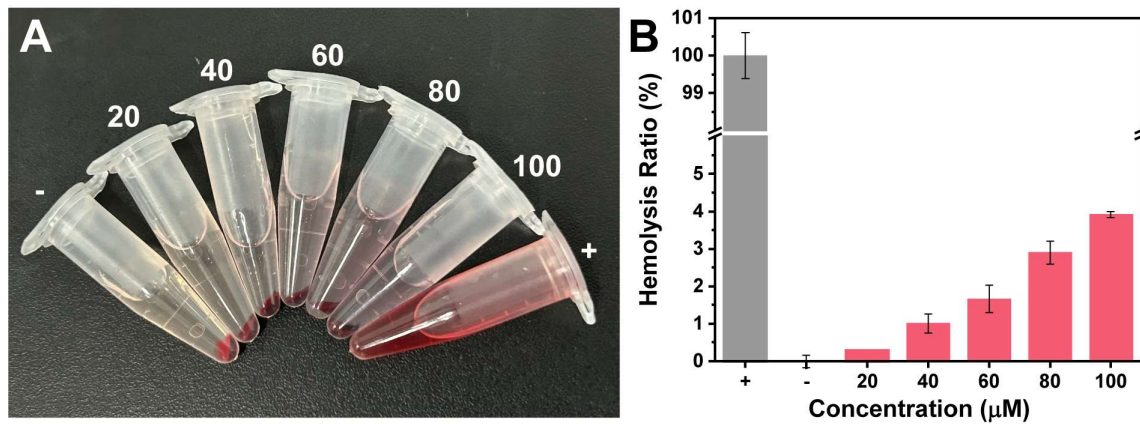

**Supplementary Fig. 39:** The hemolysis test of **ESI5-S agg**. A suspension of 2% sheep red blood cells was mixed with **ESI5-S agg** (0-100 μM), compared to Triton X-100 (+, 2%). (n = 3, Data are presented as mean values +/- SD)

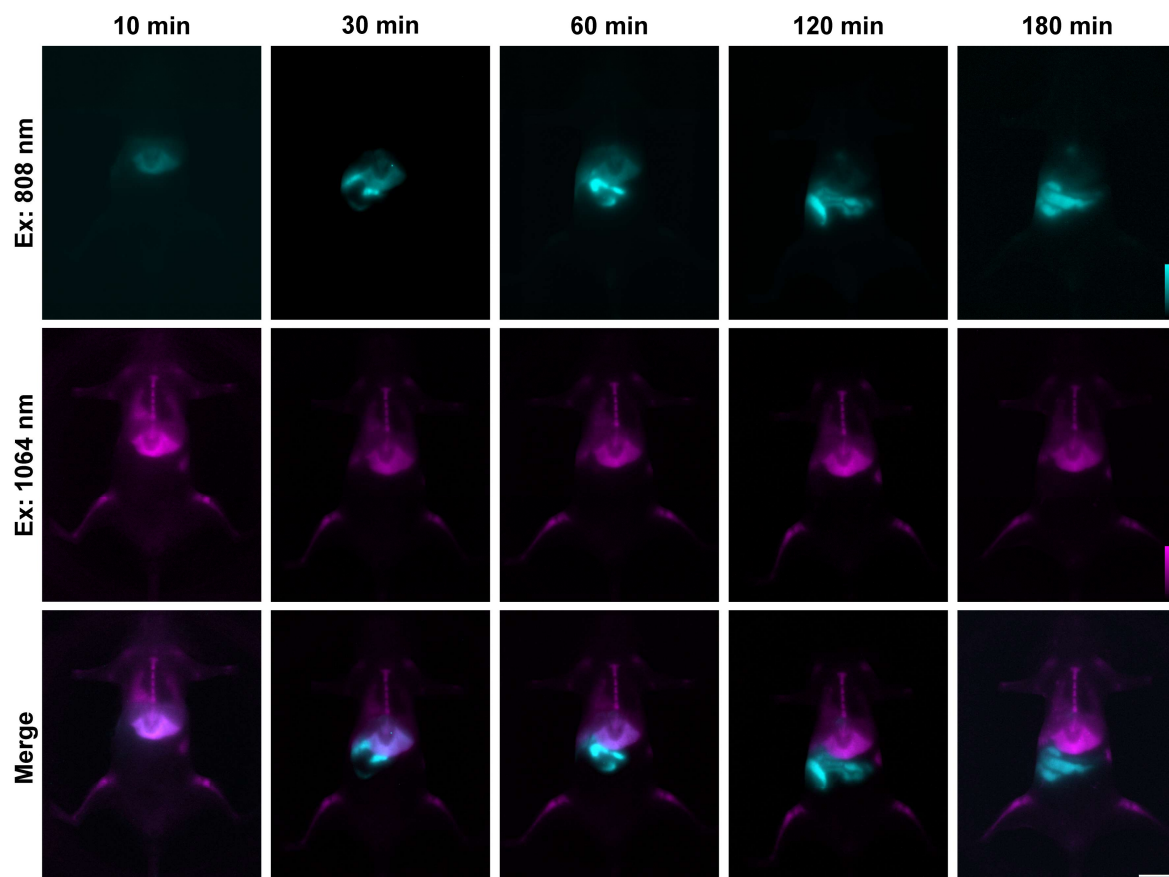

**Supplementary Fig. 40:** The dual-channel fluorescence images of BALB/c mice in supine position acquired 0 min, 30 min, 60 min, 120 min, or 180min post *i.v.* injection of **ESI5-S agg**. Scale bar: 10 mm. 808 nm channel:  $\lambda_{ex} = 808 \text{ nm}$  ( $60 \text{ mW} \cdot \text{cm}^{-2}$ ), long pass filter: 1200 nm, exposure time: 100 ms. 1064 nm channel:  $\lambda_{ex} = 1064 \text{ nm}$  ( $80 \text{ mW} \cdot \text{cm}^{-2}$ ), long pass filter: 1200+1350 nm, exposure time: 500 ms.

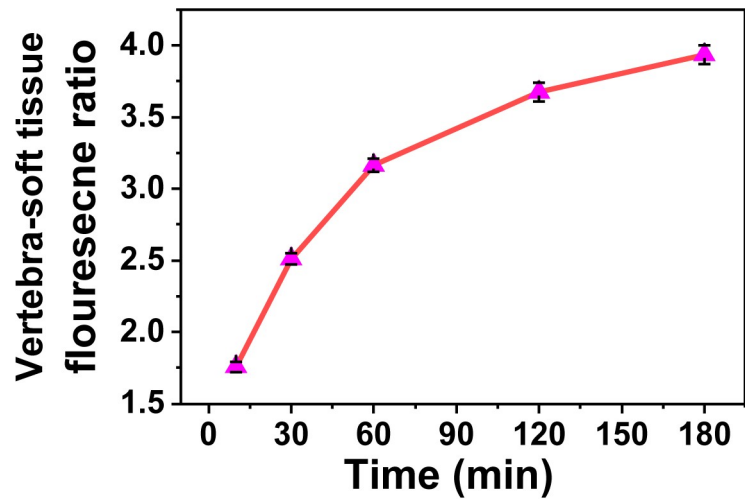

**Supplementary Fig. 41:** The vertebra-soft tissue fluorescence ratio of mouse post-injection of ESI5-S agg (500  $\mu$ M in PBS, 100  $\mu$ L). (n=3, Data are presented as mean values +/- SD)

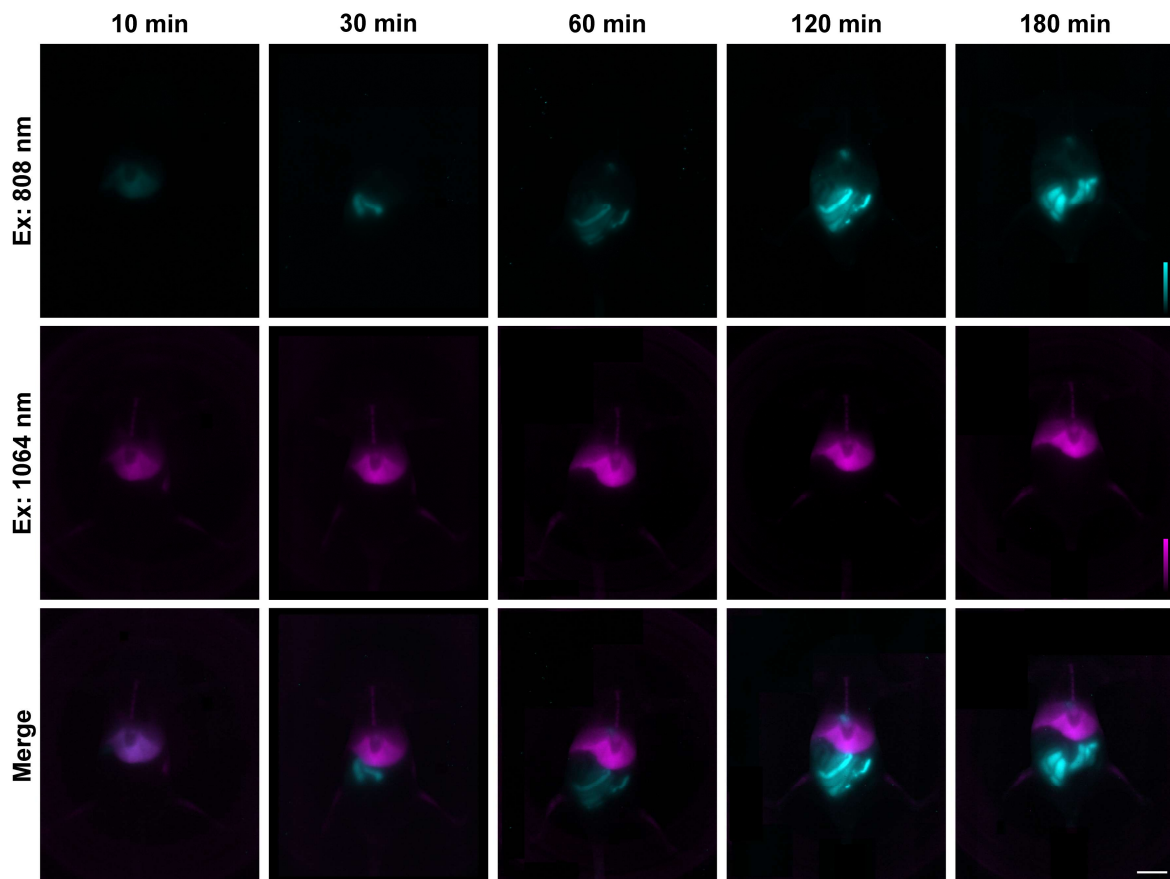

**Supplementary Fig. 42:** The repeat dual-channel fluorescence images of BALB/c mice in supine position acquired 0 min, 30 min, 60 min, 120 min, or 180min post *i.v.* injection of ESI5-S agg. Scale bar: 10 mm. 808 nm channel:  $\lambda_{ex}$  = 808 nm (60 mW $\cdot$ cm $^{-2}$ ), long pass filter: 1200 nm, exposure time: 100 ms. 1064 nm channel:  $\lambda_{ex}$  = 1064 nm (80 mW $\cdot$ cm $^{-2}$ ), long pass filter: 1200+1350 nm, exposure time: 500 ms.



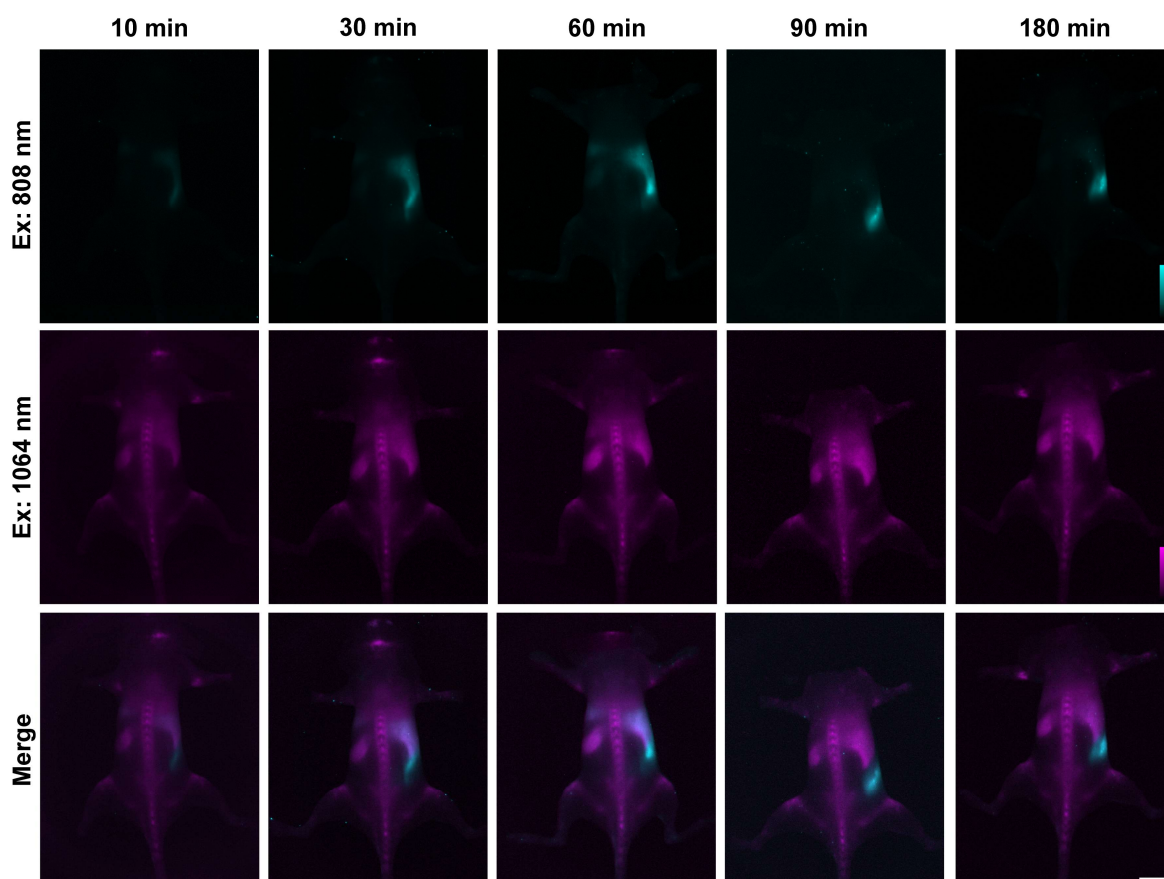

**Supplementary Fig. 43:** The dual-channel fluorescence images of BALB/c mice in prone position acquired 0 min, 30 min, 60 min, 120 min, or 180 min post *i.v.* injection of **ESi5-S agg**. Scale bar: 10 mm. 808 nm channel:  $\lambda_{ex} = 808 \text{ nm}$  ( $60 \text{ mW} \cdot \text{cm}^{-2}$ ), long pass filter: 1200 nm, exposure time: 100 ms. 1064 nm channel:  $\lambda_{ex} = 1064 \text{ nm}$  ( $80 \text{ mW} \cdot \text{cm}^{-2}$ ), long pass filter: 1200+1350 nm, exposure time: 500 ms.

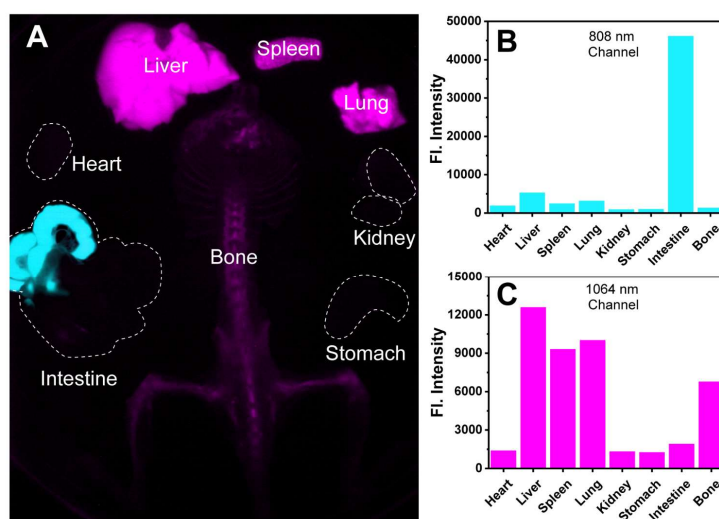

**Supplementary Fig. 44:** (A). The fluorescence image of the tissue distribution in mice after injection of **ESi5-S agg**. The major tissues including the heart, liver, spleen, lung, kidney, stomach, intestine, and bone. (B, C). The fluorescence intensity of major tissues in 808 nm channel (B) and 1064 nm channel (C) 180 min post-injection of **ESi5-S agg**.

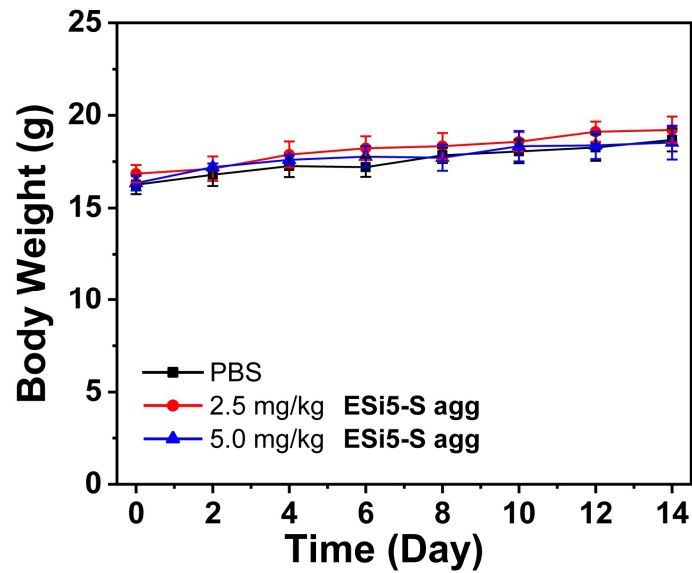

**Supplementary Fig. 45:** The change of the body weight of BALB/c mice after intravenous injected with PBS (100  $\mu$ L), 2.5 mg/kg **ESi5-S agg** and 5.0mg/kg **ESi5-S agg**. (n=6, Data are presented as mean values +/- SD)

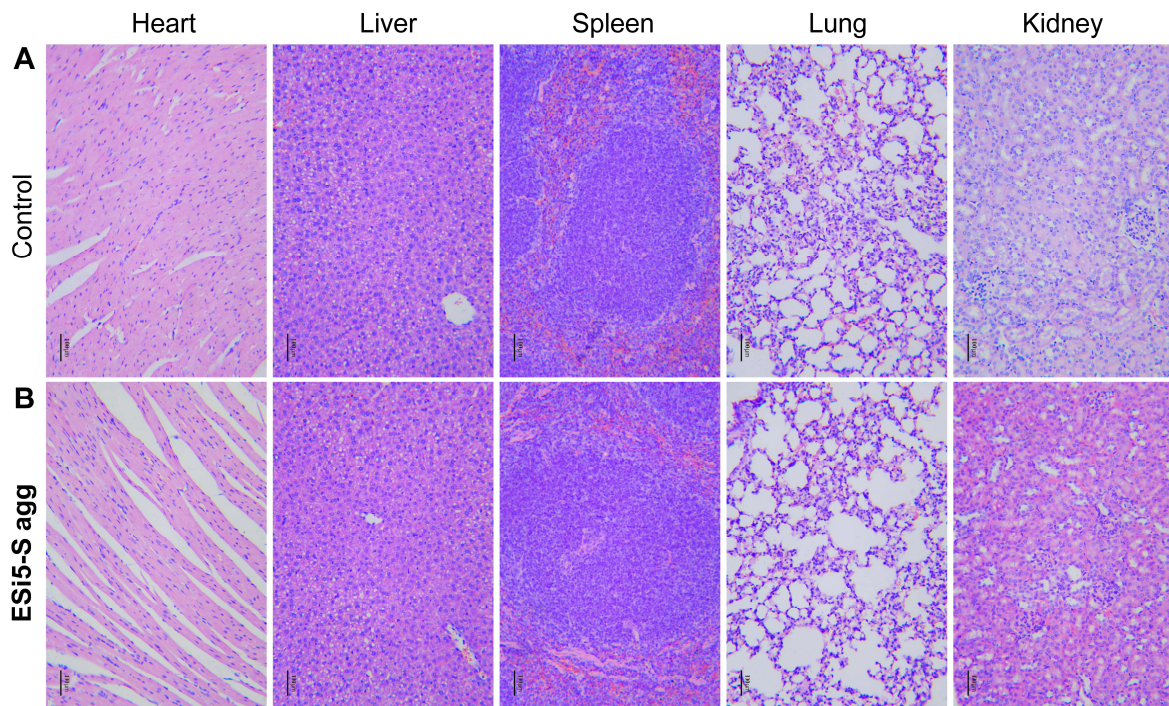

**Supplementary Fig. 46:** H&E images of major organs (including heart, liver, spleen, lung and kidney) collected from (A) BALB/c mice treated with PBS (100  $\mu$ L) and (B) BALB/c mice at 24 h post-injection of **ESi5-S agg** (2.5 mg/kg). No obvious organ damage or lesion was observed for **ESi5-S agg** injected mice. Scale bar: 100  $\mu$ m.



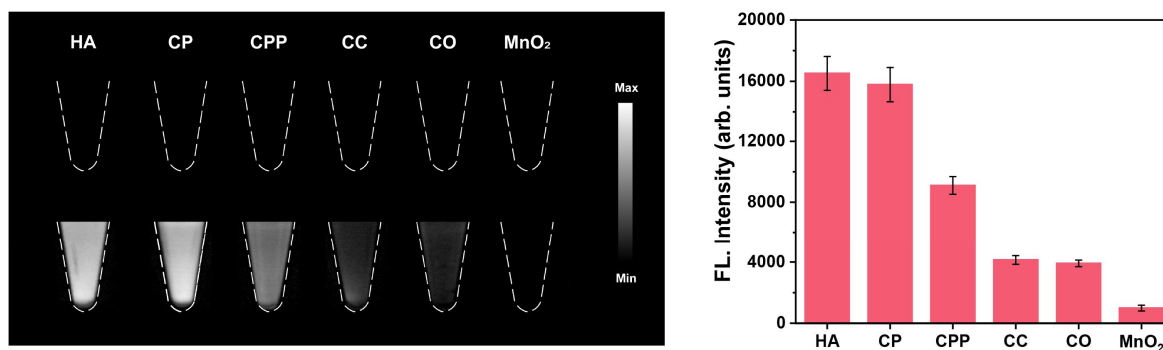

**Supplementary Fig. 47:** The fluorescence image (A) and fluorescence intensity (B) of **ESI5-S agg** binding with different calcium-containing salts and MnO<sub>2</sub>. Note: hydroxyapatite (HA), calcium phosphate (CP), calcium pyrophosphate salts (CPP), calcium carbonate (CC), calcium oxalate (CO), and manganese dioxide (MnO<sub>2</sub>).

## Synthesis and characterization

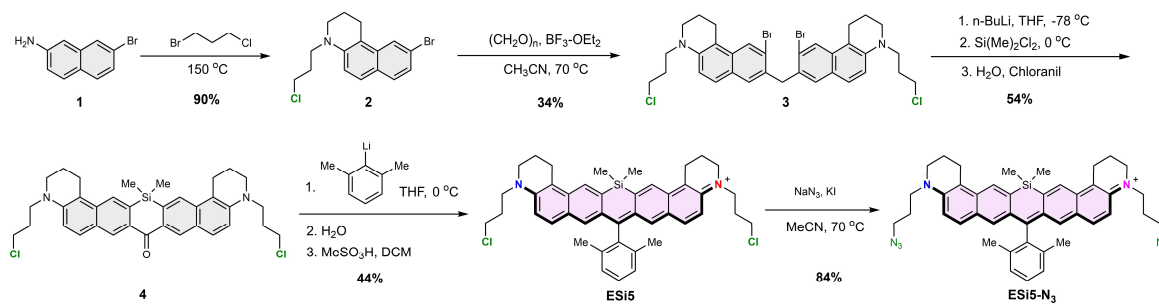

**Supplementary Fig. 48:** The synthetic scheme of **ESI5-N<sub>3</sub>**

**Synthesis of 2.** 7-bromo-2-naphthylamine (20.0 g, 90.06 mmol, 1 equiv.) was dissolved in 1-bromo-3-chloropropane (44.6 mL, 450.28 mmol, 5 equiv.) in a 250 mL round-bottomed flask. The reaction was stirred at 150 °C for 24 h before quenched by additional of H<sub>2</sub>O (100 mL). The mixture was cooled down to room temperature, and extracted with CH<sub>2</sub>Cl<sub>2</sub> (3 × 50 mL). The organic layer was dried over anhydrous Na<sub>2</sub>SO<sub>4</sub>, filtered and evaporated to dryness. The residue was purified by chromatography column (silica, PE/EA, 50:1, v/v) to give **2** (27.6 g, 90% yield) as a colorless oil. The <sup>1</sup>H-NMR of the compound **2** was verified to be identical with literature spectra.<sup>29</sup>

**Synthesis of 3.** Compound **2** (2.0 g, 5.91 mmol, 1 equiv), and BF<sub>3</sub>•OEt<sub>2</sub> (0.2 mL) and paraformaldehyde (0.35 g, 11.8 mmol, 2 equiv) was dissolved in MeCN (20 mL) in a 100 mL pressure bottle and the mixture was stirred at 80 °C for 6 hours. The reaction mixture was cooled to room temperature and quenched by H<sub>2</sub>O (50 mL). The reaction mixture was extracted with EtOAc (3 × 20 mL), dried over anhydrous Na<sub>2</sub>SO<sub>4</sub>, filter and evaporated. The residue was purified by chromatography column (silica, PE/EA, 50:1→20:1, v/v) to give **3** (0.69 g, 34% yield) as a yellow solid. The <sup>1</sup>H-NMR of the compound **3** was verified to be identical with literature spectra.<sup>29</sup>

**Synthesis of 4.** A solution compound **3** (1.0 g, 1.45 mmol, 1 equiv.) in anhydrous THF (20 mL) was cooled down to -78 °C under argon atmosphere. n-BuLi (2.5 M, 1.28 mL, 3.19 mmol, 5 equiv.) was added into the mixture and stirred for 30 minutes. Upon warmed to

room temperature, a solution of  $\text{Me}_2\text{SiCl}_2$  (2.5 M, 1.28 mL, 3.19 mmol, 2.2 equiv.) was added, and the mixture was stirred for an additional 1 hours. The reaction mixture was then quenched with the addition of saturated  $\text{NH}_4\text{Cl}$ , extracted with EtOAc ( $3 \times 20$  mL), dried over anhydrous  $\text{Na}_2\text{SO}_4$ , filter and evaporated. The residue was dissolved in EtOAc (20 mL) and tetrachlorobenzoquinone (1 g) was added, then the mixture was stirred overnight. The reaction mixture was then quenched with the addition of  $\text{H}_2\text{O}$ , extracted with EtOAc ( $3 \times 20$  mL), dried over anhydrous  $\text{Na}_2\text{SO}_4$ , filter and evaporated. The residue was purified by chromatography column (silica, PE/EA, 20:1→5:1, v/v) to give **4** (0.48 g, 54% yield) as a yellow solid. The  $^1\text{H-NMR}$  of the compound **4** was verified to be identical with literature spectra.<sup>29</sup>

Synthesis of **ESi5**. A solution of 1-bromo-2,6-dimethylbenzene (0.56 mL, 3.99 mmol, 6 equiv.) in anhydrous THF (10 mL) was cooled down to  $-78$  °C under argon atmosphere. *n*-BuLi (2.5 M, 1.33 mL, 3.32 mmol, 5 equiv.) was added, and the mixture was stirred at  $-78$  °C for 20 minutes. Then the mixture was added to a solution of compound **4** (0.4 g, 0.66 mmol, 1 equiv.) in anhydrous THF (10 mL) at 0 °C. The reaction mixture was warmed to room temperature for 20 minutes and then quenched by MeOH (5 mL).  $\text{MeSO}_3\text{H}$  (0.5 mL) was added to the mixture, and then extracted with  $\text{CH}_2\text{Cl}_2$  ( $3 \times 20$  mL), dried with anhydrous  $\text{Na}_2\text{SO}_4$ , filter and evaporated. The residue was purified by chromatography column (silica, DCM/MeOH, 100:1→20:1, v/v) to give **ESi5** (201 mg, 44% yield) as a deep violet solid. The  $^1\text{H-NMR}$  of the compound **ESi5** was verified to be identical with literature spectra.<sup>29</sup>

Synthesis of **ESi5-N<sub>3</sub>**. **ESi5** (50 mg, 0.07 mmol, 1 equiv.), sodium azide (14 mg, 0.21 mmol, 3 equiv.) and KI (10 mg) were dissolved in MeCN (10 mL) and stirred at 70 °C for 8 h. Upon cooling to room temperature, the mixture was extracted with EtOAc ( $3 \times 20$  mL) and dried with anhydrous  $\text{Na}_2\text{SO}_4$ , filter and evaporated. The residue was purified by chromatography column (silica, DCM/MeOH, 100:1→20:1, v/v) to give **ESi5-N<sub>3</sub>** (43 mg, 84% yield) as a deep violet solid. The  $^1\text{H-NMR}$  of the compound **ESi5-N<sub>3</sub>** was verified to be identical with literature spectra.<sup>29</sup>

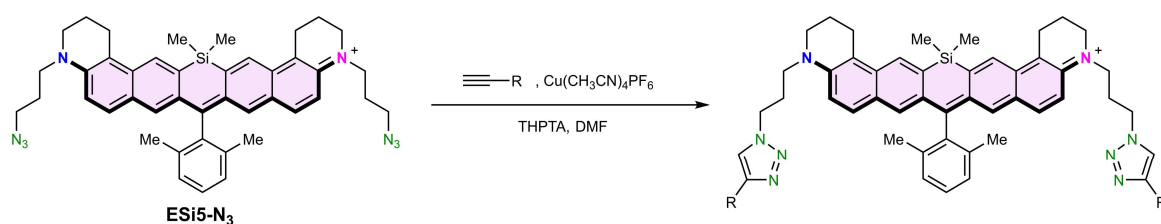

**Supplementary Fig. 49:** The general synthetic scheme of water-soluble modified ESi5.

**General Method for Click Reaction:** To a solution of **ESi5-N<sub>3</sub>** (0.072 mmol, 50.0 mg) and the corresponding terminal alkyne-containing compound (0.284 mmol, 4.0 eq.) dissolved in DMF (20 mL) was added a solution of  $[(\text{CH}_3\text{CN})_4\text{Cu}]\text{PF}_6$  (0.028 mmol, 9.5 mg, 0.4 eq.) and tris(3-hydroxypropyltriazolylmethyl) amine (THPTA, 0.014 mmol, 6.5 mg, 0.2 eq.) in water (1 mL) with stirring. The reaction ran at room temperature for 2 h. The mixture was evaporated to dryness and the crude product was purified with a chromatograph column over reverse phase silica using  $\text{H}_2\text{O}/\text{MeOH}$  (v/v = 1/1) as the eluent. The fractions containing the product were lyophilized to give corresponding compound as a dark red

powder.

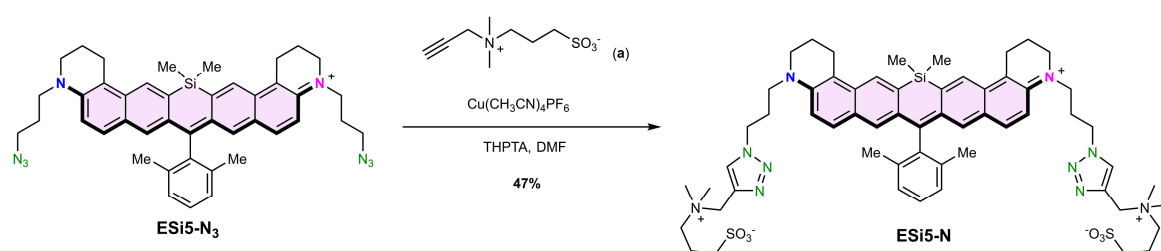

**Supplementary Fig. 50:** The synthetic scheme of **ESI5-NS**.

Synthesis of **ESI5-NS**: Compound **ESI5-NS** was prepared following the general method with **a** (purchased from Leyan) in an isolated yield of 47% (37.5 mg). <sup>1</sup>H NMR (600 MHz, CD<sub>3</sub>OD) δ 8.48 (s, 2H), 8.10 (s, 2H), 7.54 (s, 2H), 7.47 (t, J = 7.7 Hz, 1H), 7.41 (d, J = 9.4 Hz, 2H), 7.33 (d, J = 7.7 Hz, 2H), 7.17 (d, J = 9.4 Hz, 2H), 4.67 (s, 4H), 4.59 (t, J = 7.0 Hz, 4H), 3.74 (t, J = 7.5 Hz, 4H), 3.67 (t, J = 5.5 Hz, 4H), 3.48 – 3.39 (m, 4H), 3.15 (t, J = 6.0 Hz, 4H), 3.13 (s, 12H), 2.86 (t, J = 6.4 Hz, 4H), 2.46 – 2.36 (m, 4H), 2.34 – 2.23 (m, 4H), 2.20 – 2.10 (m, 4H), 2.01 (s, 6H), 0.65 (s, 6H). <sup>13</sup>C NMR (151 MHz, CD<sub>3</sub>OD) δ 165.35, 153.55, 143.77, 139.19, 137.93, 136.85, 136.54, 133.97, 132.56, 130.63, 130.26, 129.33, 117.99, 63.33, 59.16, 51.93, 51.14, 50.00, 48.83, 29.15, 24.33, 22.49, 20.32, 0.39. HRMS (ESI) (m/z): [M]<sup>+</sup> calculated. for C<sub>59</sub>H<sub>77</sub>N<sub>10</sub>O<sub>6</sub>S<sub>2</sub>Si<sup>+</sup>, 1113.5233; found: 1113.5233.

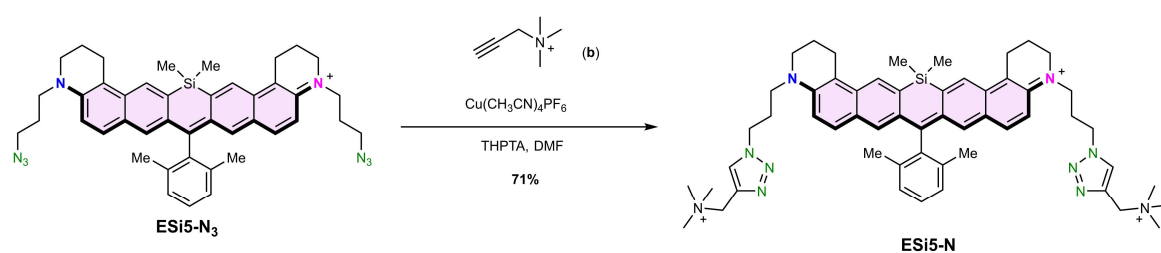

**Supplementary Fig. 51:** The synthetic scheme of **ESI5-N**.

Synthesis of **ESI5-N**: Compound **ESI5-N** was prepared following the general method with **b** (purchased from Leyan) in an isolated yield of 71% (45.2 mg). <sup>1</sup>H NMR (600 MHz, CD<sub>3</sub>OD) δ 8.45 (s, 2H), 8.11 (s, 2H), 7.55 (s, 2H), 7.47 (t, J = 7.7 Hz, 1H), 7.42 (d, J = 8.6 Hz, 2H), 7.33 (d, J = 7.6 Hz, 2H), 7.18 (d, J = 9.4 Hz, 2H), 4.70 (s, 4H), 4.62 (t, J = 7.0 Hz, 4H), 3.76 (t, J = 7.4 Hz, 4H), 3.67 (s, 4H), 3.16 (s, 22H), 2.45 – 2.35 (m, 4H), 2.18 – 2.10 (m, 4H), 2.02 (s, 6H), 0.66 (s, 6H). <sup>13</sup>C NMR (151 MHz, CD<sub>3</sub>OD) δ 153.53, 143.82, 137.31, 136.76, 136.52, 135.31, 133.99, 132.57, 130.61, 130.01, 129.30, 117.99, 61.56, 53.86, 51.84, 51.13, 33.16, 29.19, 24.33, 22.48, 20.33, 0.37. HRMS (ESI) (m/z): [M]<sup>+</sup> calculated. for C<sub>55</sub>H<sub>71</sub>N<sub>10</sub>Si<sup>3+</sup>, 899.5616; m/z = 299.8539; found: 299.8606.

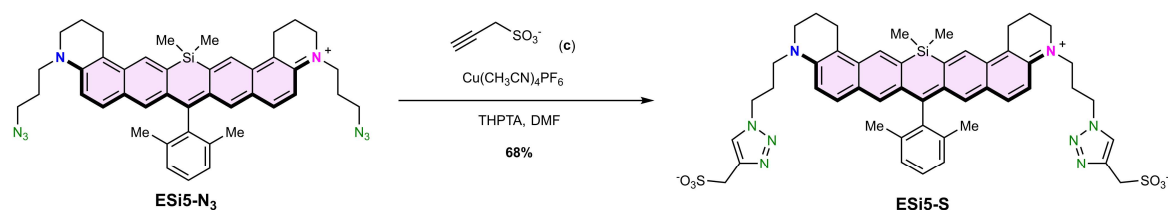

**Supplementary Fig. 52:** The synthetic scheme of **ESI5-S**.

Synthesis of **ESI5-S**: Compound **ESI5-S** was prepared following the general method with

with **c** (purchased from Leyan) in an isolated yield of 68% (48.1 mg).  $^1\text{H}$  NMR (600 MHz,  $\text{CD}_3\text{OD}$ )  $\delta$  8.08 (s, 2H), 8.00 (s, 2H), 7.54 (s, 2H), 7.46 (t,  $J = 7.7$  Hz, 1H), 7.42 (d,  $J = 9.4$  Hz, 2H), 7.32 (d,  $J = 7.7$  Hz, 2H), 7.06 (d,  $J = 9.4$  Hz, 2H), 4.52 (t,  $J = 6.5$  Hz, 4H), 3.66 (t,  $J = 7.5$  Hz, 4H), 3.61 (t,  $J = 5.2$  Hz, 4H), 3.12 (t,  $J = 6.3$  Hz, 4H), 2.44 – 2.26 (m, 4H), 2.18 – 2.07 (m, 4H), 2.01 (s, 7H), 0.64 (s, 6H).  $^{13}\text{C}$  NMR (151 MHz,  $\text{CD}_3\text{OD}$ )  $\delta$  171.09, 153.44, 143.78, 142.25, 139.10, 137.90, 136.66, 133.91, 132.48, 131.27, 130.59, 129.29, 126.04, 117.89, 117.84, 51.69, 50.99, 49.98, 29.06, 24.31, 22.46, 20.33. ESI-HRMS ( $m/z$ ):  $[\text{M}]^+$  calculated for  $\text{C}_{49}\text{H}_{53}\text{N}_8\text{Na}_2\text{O}_6\text{S}_2\text{Si}^+$ , 987.3089; found: 987.3097.

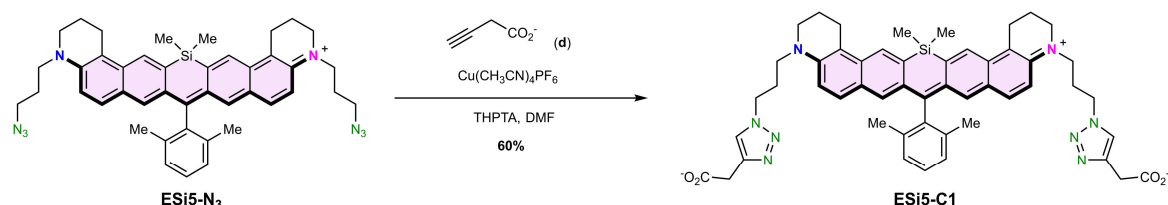

**Supplementary Fig. 53:** The synthetic scheme of **ESi5-C1**.

Synthesis of **ESi5-C1**: Compound **ESi5-C1** was prepared following the general method with with **d** (purchased from Leyan) in an isolated yield of 60% (47.4 mg).  $^1\text{H}$  NMR (600 MHz,  $\text{CD}_3\text{OD}$ )  $\delta$  8.08 (s, 2H), 7.86 (s, 2H), 7.52 (s, 2H), 7.45 (t,  $J = 7.7$  Hz, 1H), 7.39 (d,  $J = 9.4$  Hz, 2H), 7.31 (d,  $J = 7.8$  Hz, 2H), 7.08 (d,  $J = 9.4$  Hz, 2H), 4.50 (t,  $J = 6.7$  Hz, 4H), 3.68 (t,  $J = 7.5$  Hz, 4H), 3.61 (t,  $J = 5.4$  Hz, 4H), 3.12 (t,  $J = 6.3$  Hz, 4H), 2.36 – 2.28 (m, 4H), 2.15 – 2.07 (m, 4H), 1.99 (s, 6H), 0.64 (s, 6H).  $^{13}\text{C}$  NMR (151 MHz,  $\text{CD}_3\text{OD}$ )  $\delta$  178.27, 170.96, 153.42, 143.70, 140.21, 139.15, 137.88, 136.68, 136.48, 133.92, 132.53, 130.59, 129.28, 125.17, 117.93, 117.87, 51.73, 51.08, 49.98, 29.13, 24.29, 22.45, 20.32, 0.36. ESI-HRMS ( $m/z$ ):  $[\text{M}]^+$  calculated. for  $\text{C}_{51}\text{H}_{55}\text{N}_8\text{O}_4\text{Si}^+$ , 871.4110; found: 871.4113.

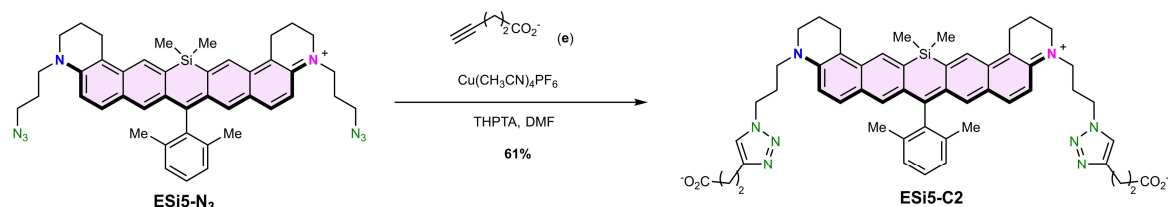

**Supplementary Fig. 54:** The synthetic scheme of **ESi5-C2**.

Synthesis of **ESi5-C2**: Compound **ESi5-C2** was prepared following the general method with with **e** (purchased from Leyan) in an isolated yield of 61% (37.1 mg).  $^1\text{H}$  NMR (600 MHz,  $\text{CD}_3\text{OD}$ )  $\delta$  8.08 (s, 2H), 7.74 (s, 2H), 7.54 (s, 2H), 7.47 (t,  $J = 7.7$  Hz, 1H), 7.39 (d,  $J = 9.4$  Hz, 2H), 7.33 (d,  $J = 7.8$  Hz, 2H), 7.06 (d,  $J = 9.4$  Hz, 2H), 4.47 (t,  $J = 6.6$  Hz, 4H), 3.67 (t,  $J = 7.4$  Hz, 4H), 3.59 (t,  $J = 5.5$  Hz, 4H), 3.11 (t,  $J = 6.4$  Hz, 4H), 2.93 (t,  $J = 7.3$  Hz, 4H), 2.54 (t,  $J = 7.3$  Hz, 4H), 2.36 – 2.26 (m, 4H), 2.17 – 2.07 (m, 4H), 2.01 (s, 6H), 0.64 (s, 6H).  $^{13}\text{C}$  NMR (151 MHz,  $\text{CD}_3\text{OD}$ )  $\delta$  168.70, 165.65, 149.70, 143.80, 137.92, 136.70, 136.50, 132.51, 131.28, 130.61, 129.30, 123.95, 117.90, 117.83, 51.73, 51.15, 49.99, 38.44, 29.05, 24.28, 23.68, 22.43, 20.35. HRMS (ESI) ( $m/z$ ):  $[\text{M}]^+$  calculated. for  $\text{C}_{53}\text{H}_{59}\text{N}_8\text{O}_4\text{Si}^+$ , 899.4424; found: 899.4427.

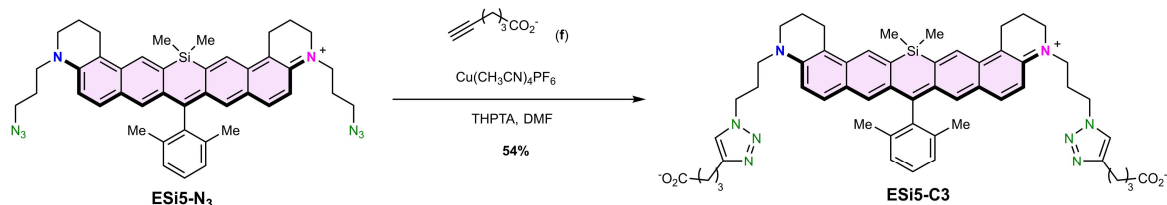

**Supplementary Fig. 55:** The synthetic scheme of **ESi5-C3**.

**Synthesis of ESi5-C3:** Compound **ESi5-C3** was prepared following the general method with with **f** (purchased from Leyan) in an isolated yield of 54% (35.6 mg). <sup>1</sup>H NMR (600 MHz, CD<sub>3</sub>OD) δ 8.08 (s, 2H), 7.76 (s, 2H), 7.54 (s, 2H), 7.46 (t, J = 7.7 Hz, 1H), 7.39 (d, J = 9.2 Hz, 2H), 7.32 (d, J = 7.7 Hz, 2H), 7.08 (d, J = 9.4 Hz, 2H), 4.48 (t, J = 6.7 Hz, 4H), 3.68 (d, J = 7.4 Hz, 4H), 3.60 (t, J = 5.5 Hz, 4H), 3.12 (t, J = 6.1 Hz, 4H), 2.68 (t, J = 7.5 Hz, 4H), 2.38 – 2.28 (m, 4H), 2.17 (t, J = 7.4 Hz, 4H), 2.14 – 2.06 (m, 4H), 2.01 (s, 6H), 1.96 – 1.84 (m, 4H), 0.64 (s, 6H). <sup>13</sup>C NMR (151 MHz, CD<sub>3</sub>OD) δ 179.86, 174.57, 153.44, 149.65, 143.81, 139.16, 137.92, 136.71, 136.47, 133.93, 132.52, 130.61, 129.29, 123.98, 117.91, 117.82, 51.73, 51.17, 49.98, 38.50, 29.07, 27.67, 26.53, 24.27, 22.42, 20.33. HRMS (ESI) (m/z): [M]<sup>+</sup> calculated. for C<sub>55</sub>H<sub>63</sub>N<sub>8</sub>O<sub>4</sub>Si<sup>+</sup>, 927.4737; found: 927.4744.

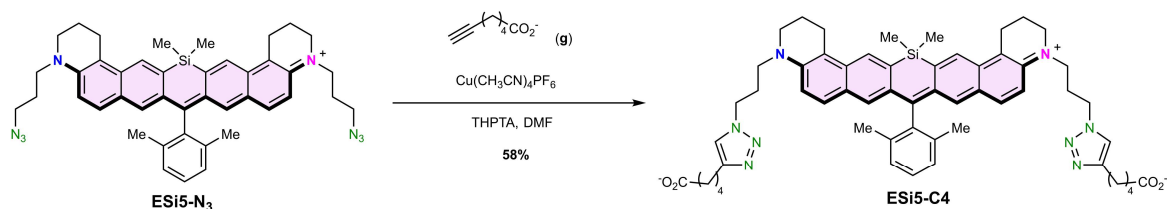

**Supplementary Fig. 56:** The synthetic scheme of **ESi5-C4**.

**Synthesis of ESi5-C4:** Compound **ESi5-C4** was prepared following the general method with with **g** (purchased from Leyan) in an isolated yield of 58% (39.2 mg). <sup>1</sup>H NMR (600 MHz, CD<sub>3</sub>OD) δ 8.08 (s, 2H), 7.74 (s, 2H), 7.54 (s, 2H), 7.47 (t, J = 7.7 Hz, 1H), 7.38 (d, J = 9.4 Hz, 2H), 7.33 (d, J = 7.7 Hz, 2H), 7.07 (d, J = 9.5 Hz, 2H), 4.48 (t, J = 6.6 Hz, 4H), 3.69 (t, J = 7.4 Hz, 4H), 3.60 (t, J = 5.6 Hz, 4H), 3.11 (t, J = 6.4 Hz, 4H), 2.64 (t, J = 7.1 Hz, 4H), 2.41 – 2.30 (m, 4H), 2.24 – 2.15 (m, 4H), 2.13 – 2.04 (m, 4H), 2.01 (s, 6H), 1.72 – 1.51 (m, 8H), 0.65 (s, 6H). <sup>13</sup>C NMR (151 MHz, CD<sub>3</sub>OD) δ 171.12, 169.56, 153.41, 149.64, 143.78, 139.16, 137.90, 136.68, 136.42, 133.92, 132.52, 131.26, 130.61, 129.29, 123.87, 117.92, 117.80, 51.70, 51.19, 49.97, 30.55, 29.02, 26.80, 26.42, 24.24, 22.38, 20.34, 0.36. HRMS (ESI) (m/z): [M]<sup>+</sup> calculated. for C<sub>57</sub>H<sub>67</sub>N<sub>8</sub>O<sub>4</sub>Si<sup>+</sup>, 955.5050; found: 955.5056.

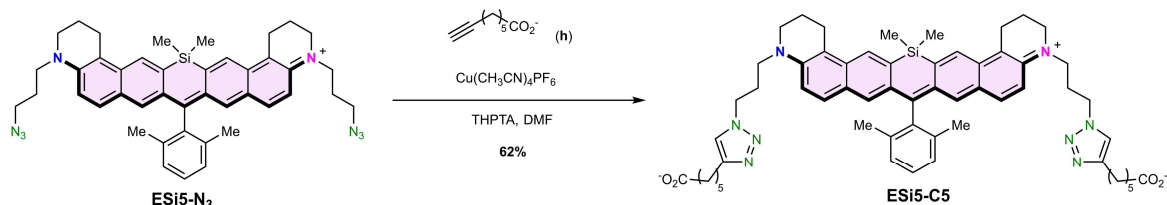

**Supplementary Fig. 57:** The synthetic scheme of **ESi5-C5**.

**Synthesis of ESi5-C5:** Compound **ESi5-C5** was prepared following the general method with with **h** (purchased from Leyan) in an isolated yield of 62% (43.1mg). <sup>1</sup>H NMR (600 MHz, CD<sub>3</sub>OD) δ 8.08 (s, 2H), 7.72 (s, 2H), 7.53 (s, 2H), 7.47 (t, J = 7.7 Hz, 1H), 7.37 (d, J = 9.4 Hz, 2H), 7.33 (d, J = 7.7 Hz, 2H), 7.06 (d, J = 9.5 Hz, 2H), 4.48 (t, J = 6.6 Hz, 4H), 3.69 (t, J = 7.3

Hz, 4H), 3.59 (t, J = 5.4 Hz, 4H), 3.10 (t, J = 6.3 Hz, 4H), 2.62 (t, J = 7.5 Hz, 4H), 2.42 – 2.26 (m, 4H), 2.16 – 2.03 (m, 8H), 2.01 (s, 6H), 1.68 – 1.50 (m, 8H), 0.64 (s, 6H). <sup>13</sup>C NMR (151 MHz, CD<sub>3</sub>OD) δ 183.07, 179.75, 173.00, 153.40, 149.79, 143.76, 139.14, 137.88, 136.67, 136.40, 132.51, 131.25, 130.61, 129.29, 123.85, 117.93, 117.79, 51.70, 51.19, 49.97, 49.40, 39.07, 29.02, 28.50, 27.54, 27.32, 26.51, 24.23, 24.14, 22.37, 20.36, 0.36. HRMS (ESI) (m/z): [M]<sup>+</sup> calculated. for C<sub>59</sub>H<sub>71</sub>N<sub>8</sub>O<sub>4</sub>Si<sup>+</sup>, 983.5363; found: 983.5365.

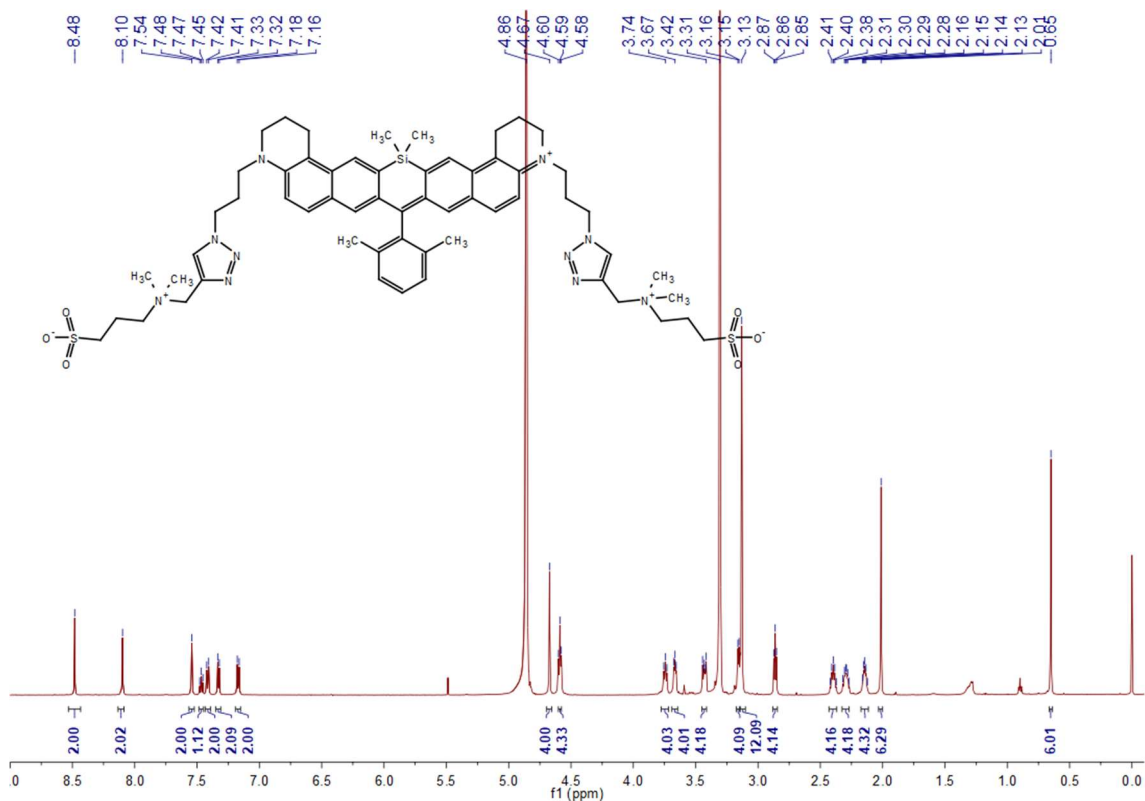

**Supplementary Fig. 58:** The <sup>1</sup>H-NMR of compound ESi5-NS in CD<sub>3</sub>OD.



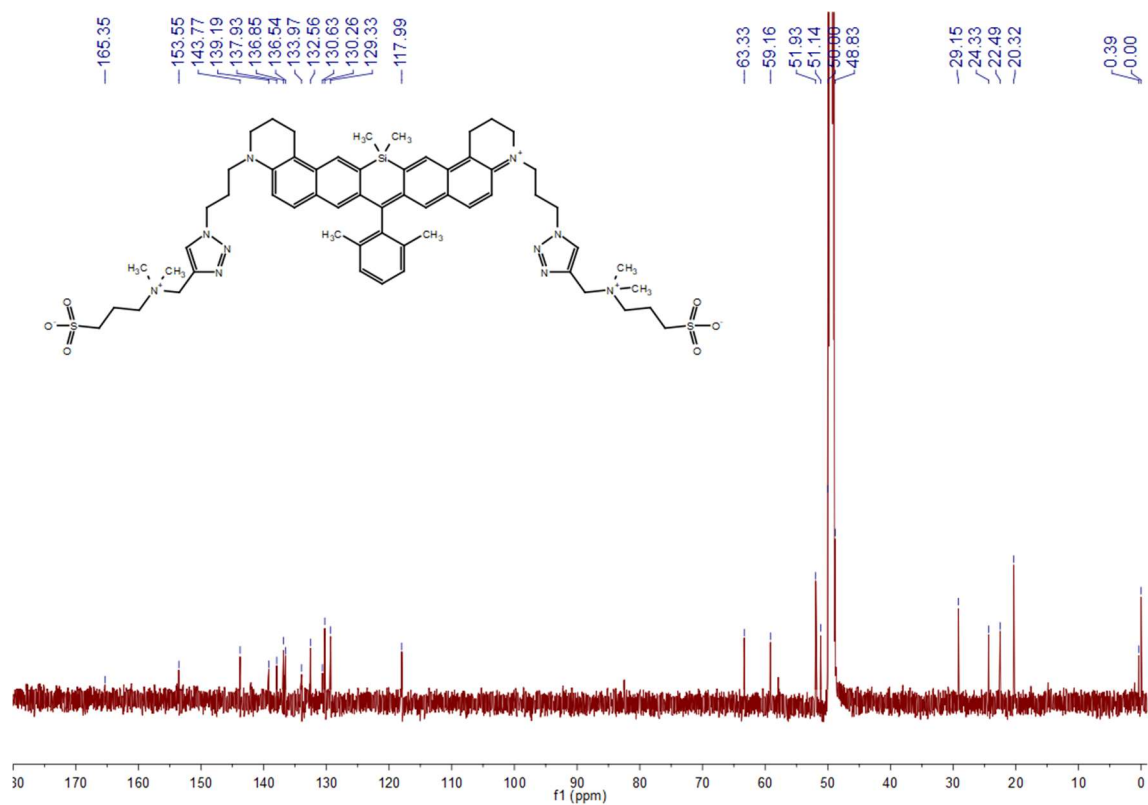

Supplementary Fig. 59: The  $^{13}\text{C}$ -NMR of compound **ESi5-NS** in  $\text{CD}_3\text{OD}$ .

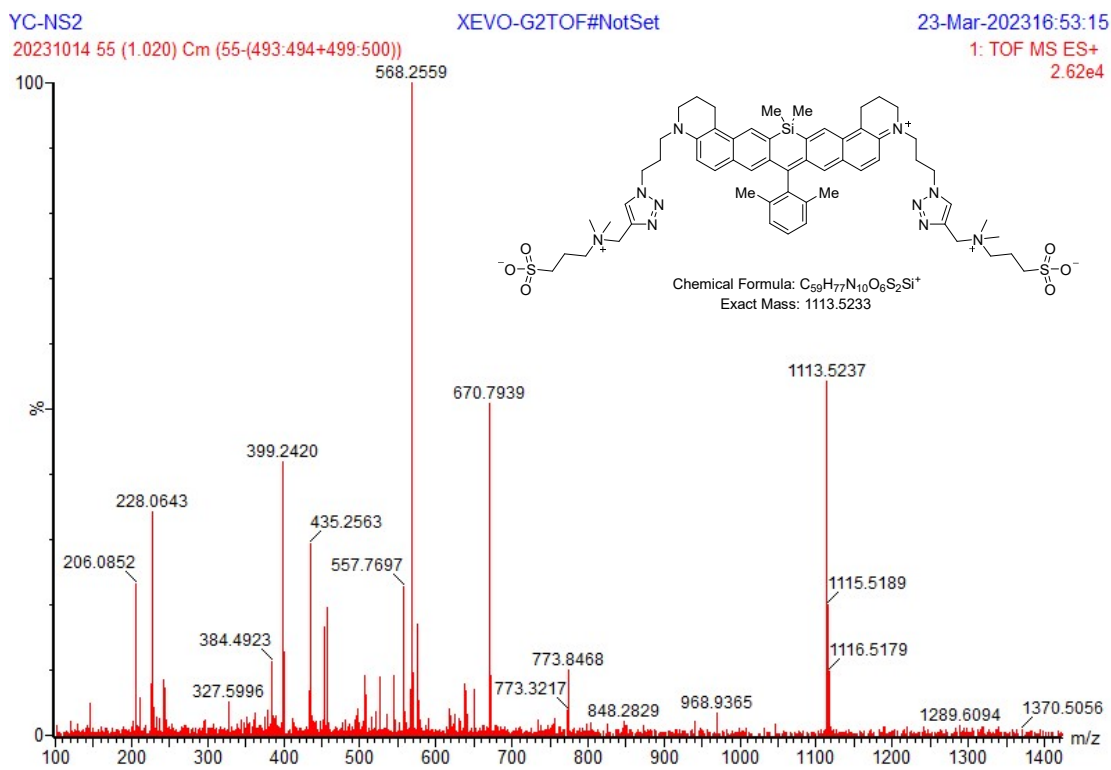

Supplementary Fig. 60: The HRMS of compound **ESi5-NS**.



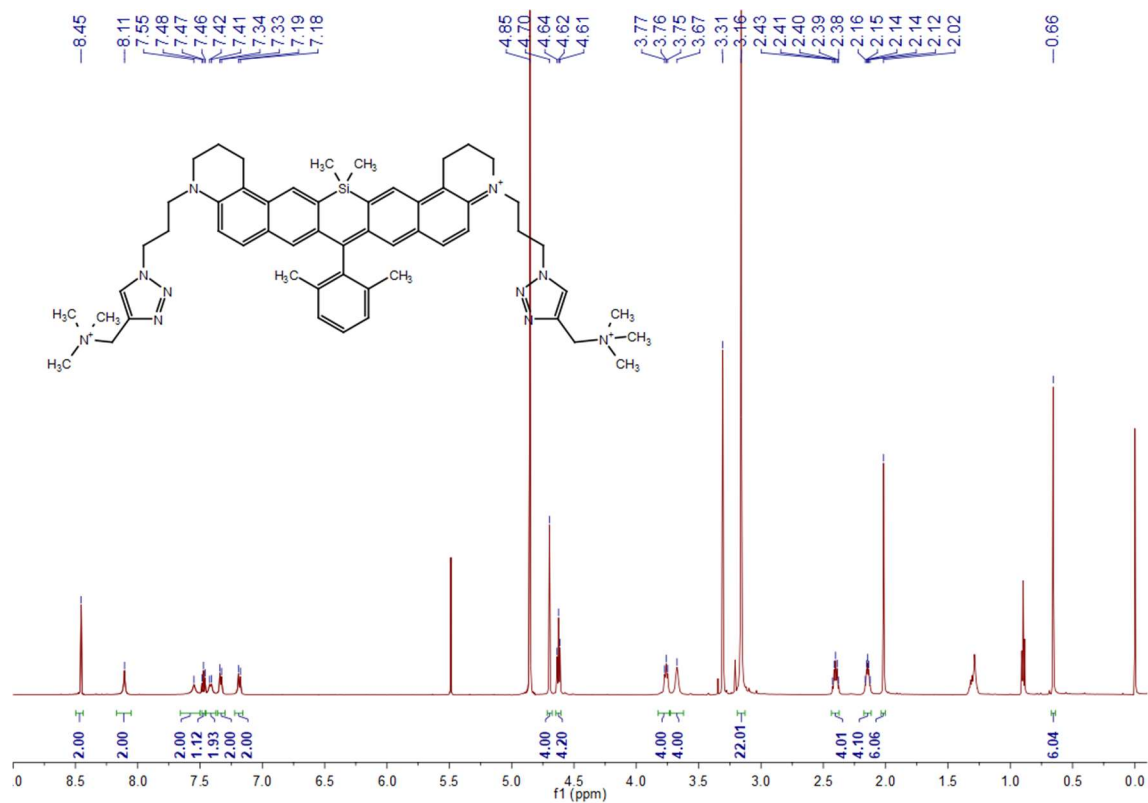

**Supplementary Fig. 61:** The <sup>1</sup>H-NMR of compound ESI5-N in CD<sub>3</sub>OD.

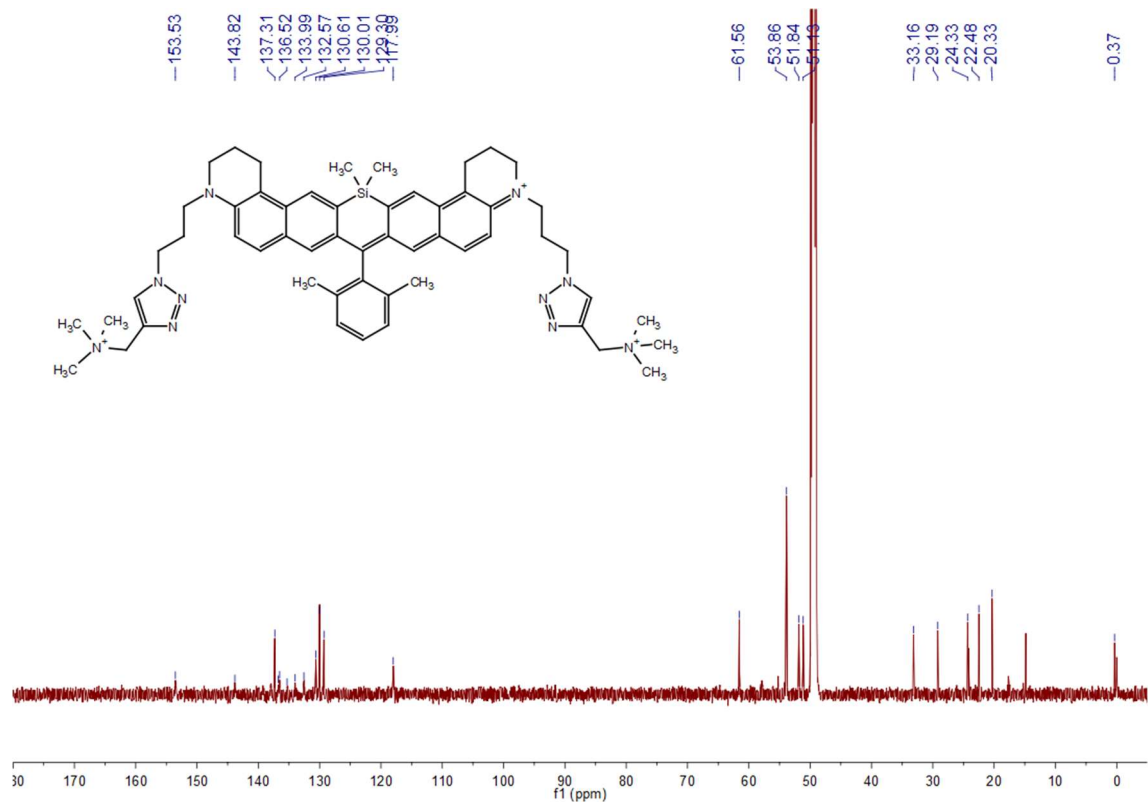

**Supplementary Fig. 62:** The <sup>13</sup>C-NMR of compound ESI5-N in CD<sub>3</sub>OD

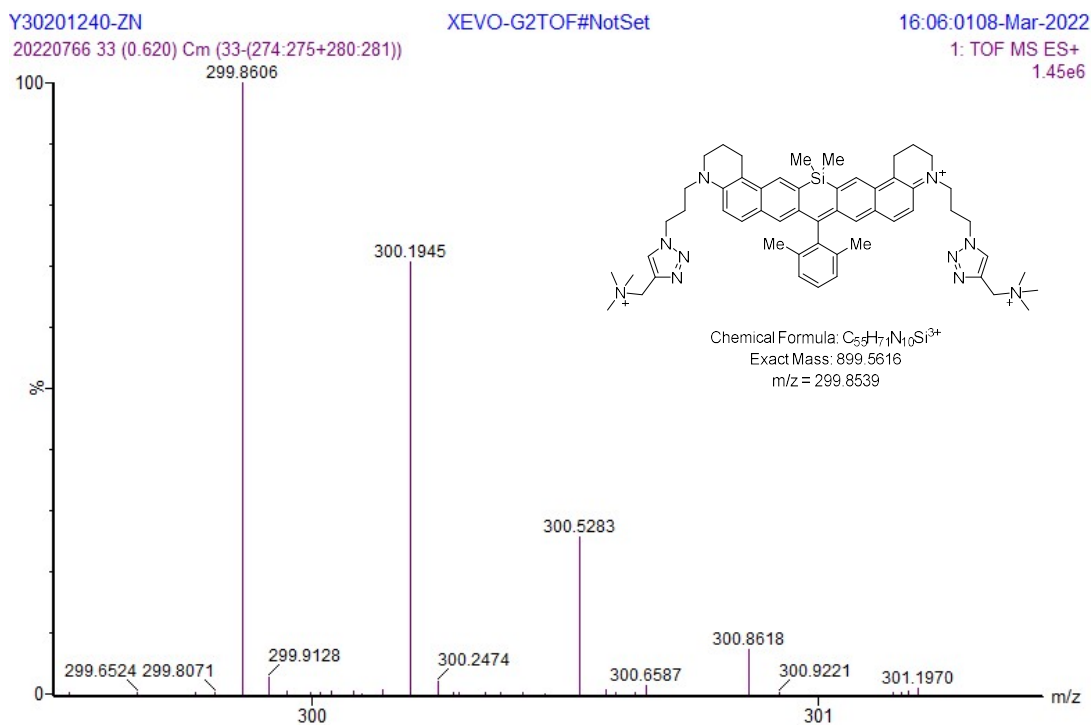

Supplementary Fig. 63: The HRMS of compound ESi5-N.

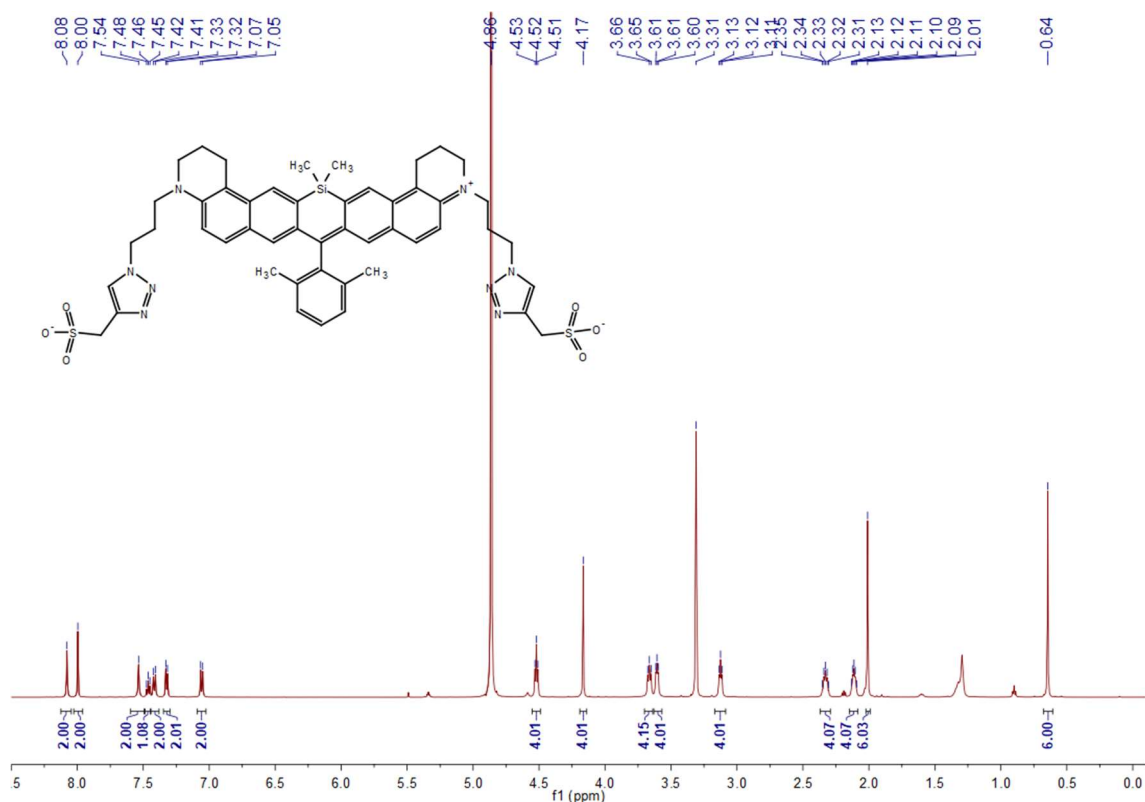

Supplementary Fig. 64: The  $^1H$ -NMR of compound ESi5-S in  $CD_3OD$ .

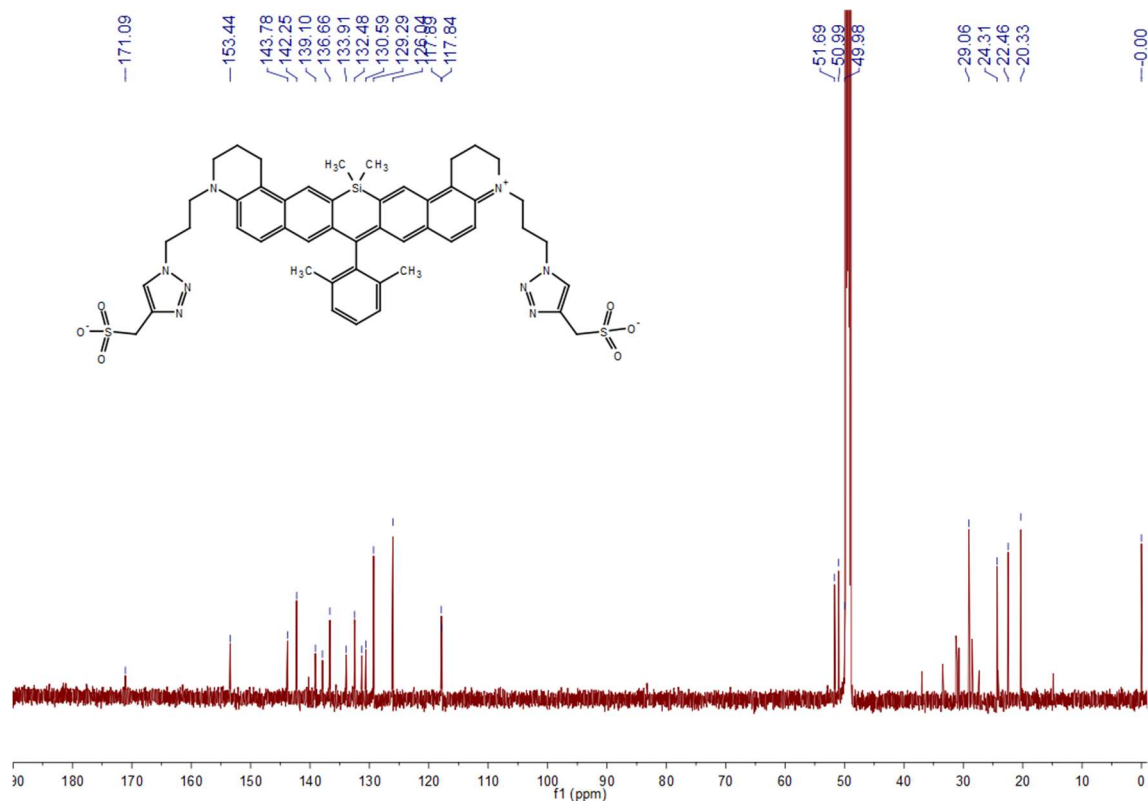

Supplementary Fig. 65: The <sup>13</sup>C-NMR of compound ESi5-S in CD<sub>3</sub>OD.

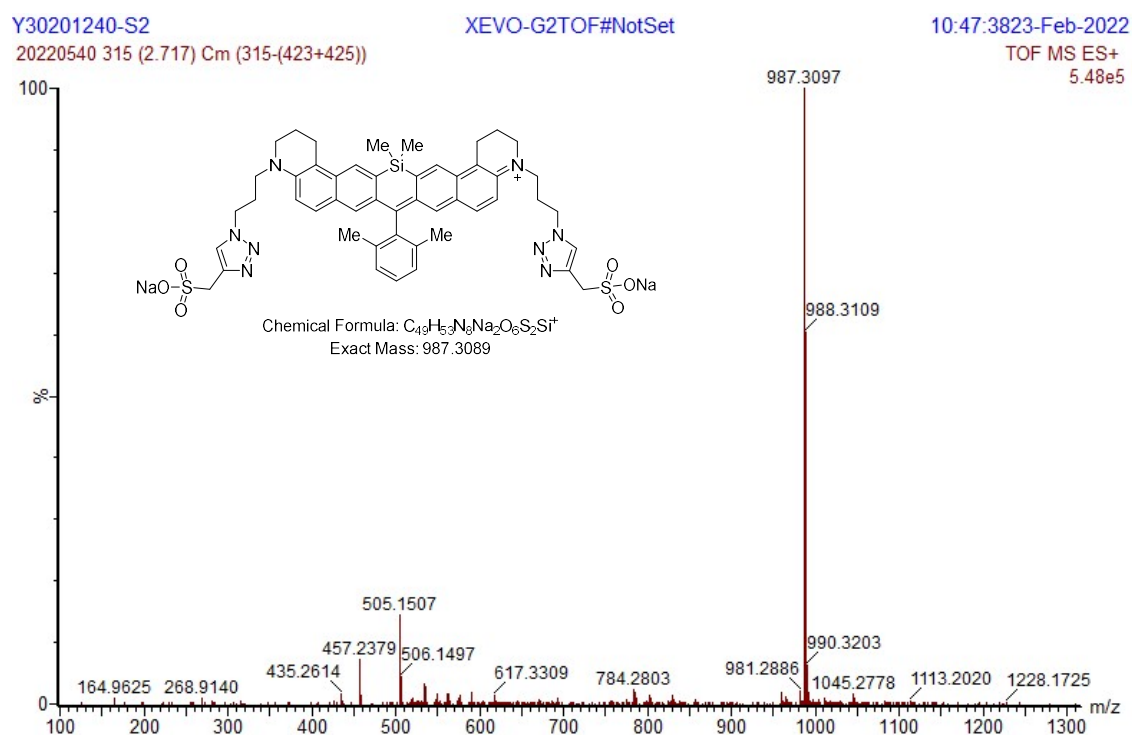

Supplementary Fig. 66: The HRMS of compound ESi5-S.

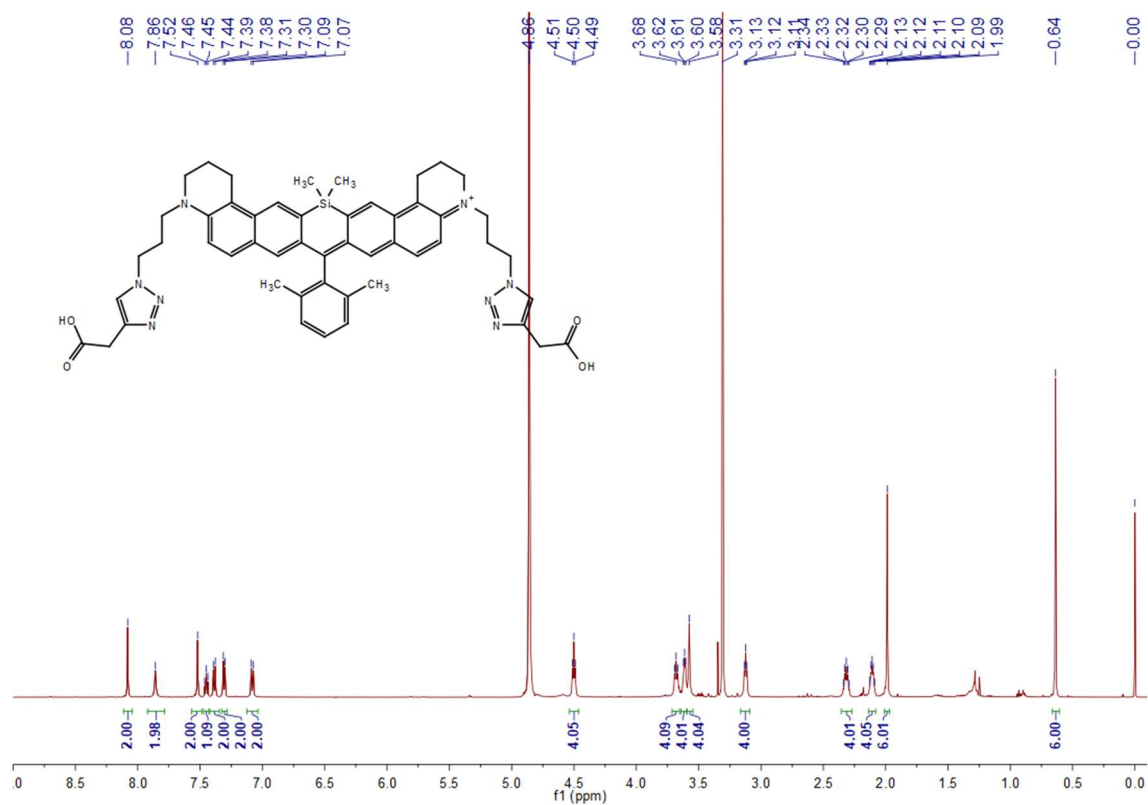

**Supplementary Fig. 67:** The <sup>1</sup>H-NMR of compound ESI5-C1 in CD<sub>3</sub>OD.

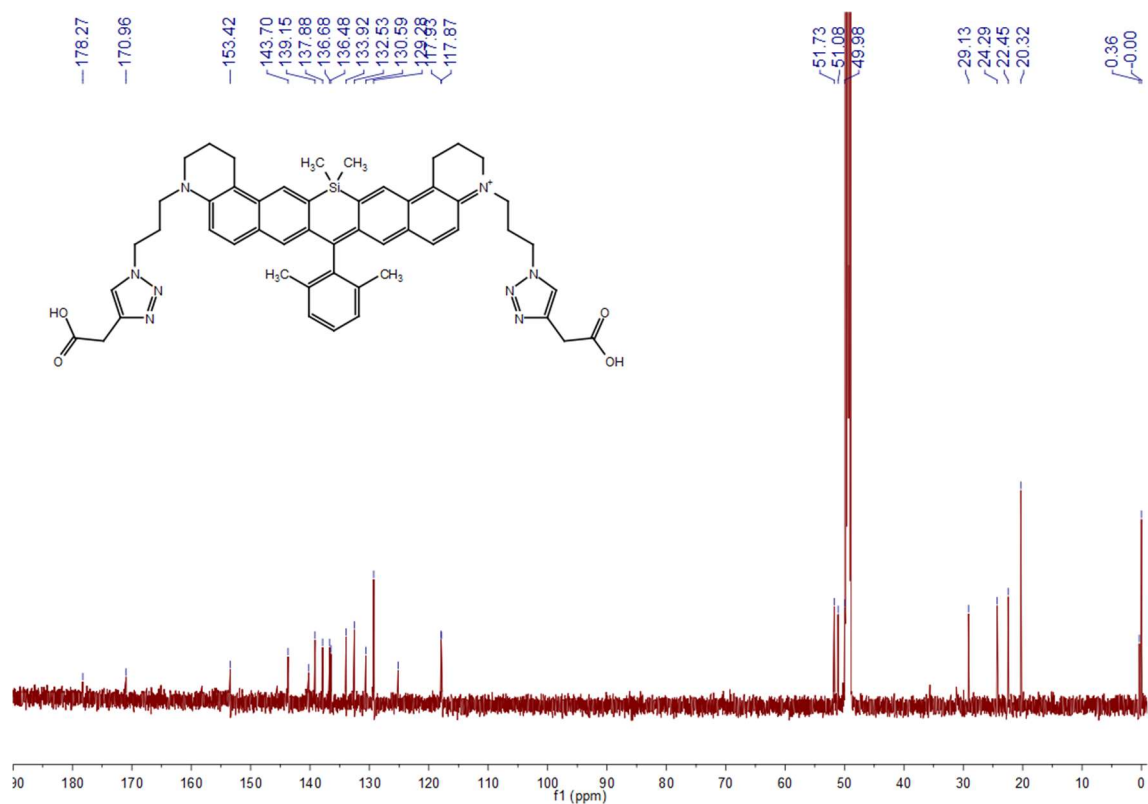

**Supplementary Fig. 68:** The <sup>13</sup>C-NMR of compound ESI5-C1 in CD<sub>3</sub>OD.

Y30201240-C2

XEVO-G2TOF#NotSet

23-Nov-2022 10:46:53

20222810 29 (0.540) Cm (29-(218:219+223:224))

1: TOF MS ES+  
1.02e6

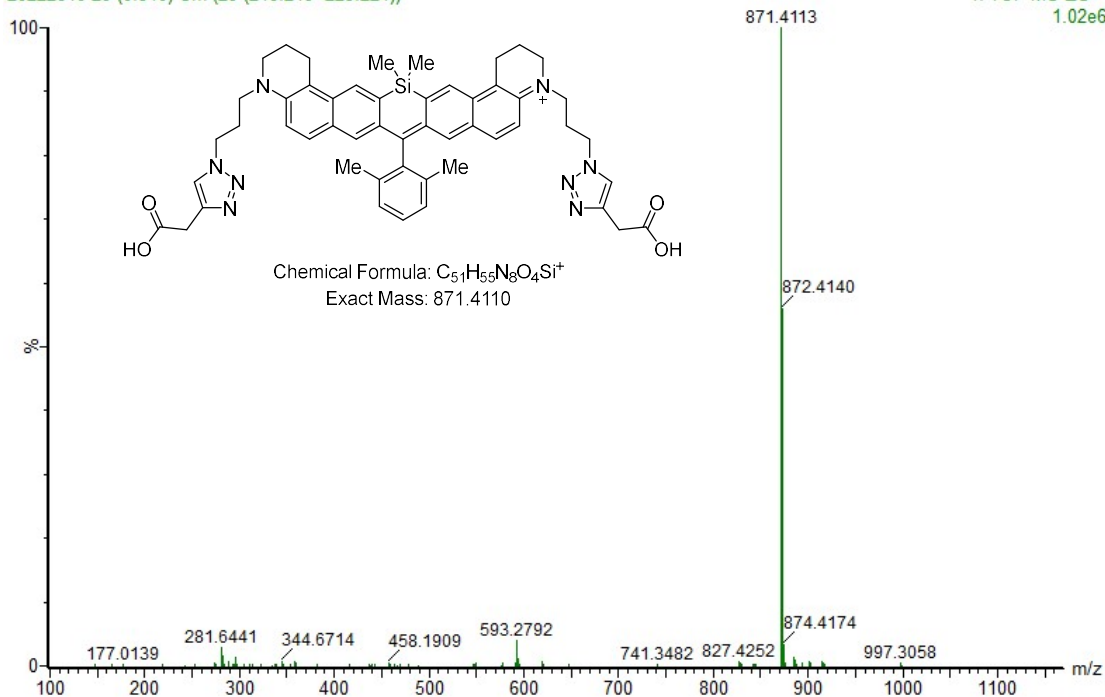

Supplementary Fig. 69: The HRMS of compound ESi5-C1.

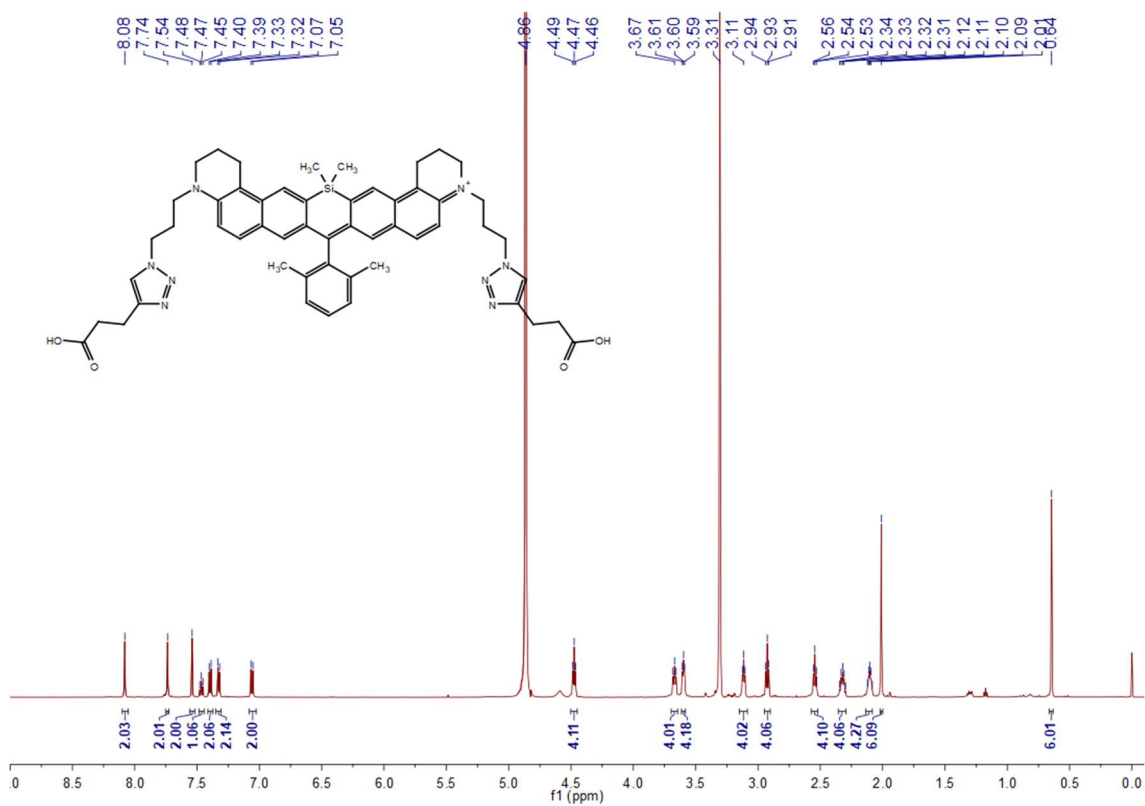

Supplementary Fig. 70: The  $^1H$ -NMR of compound ESi5-C2 in  $CD_3OD$ .



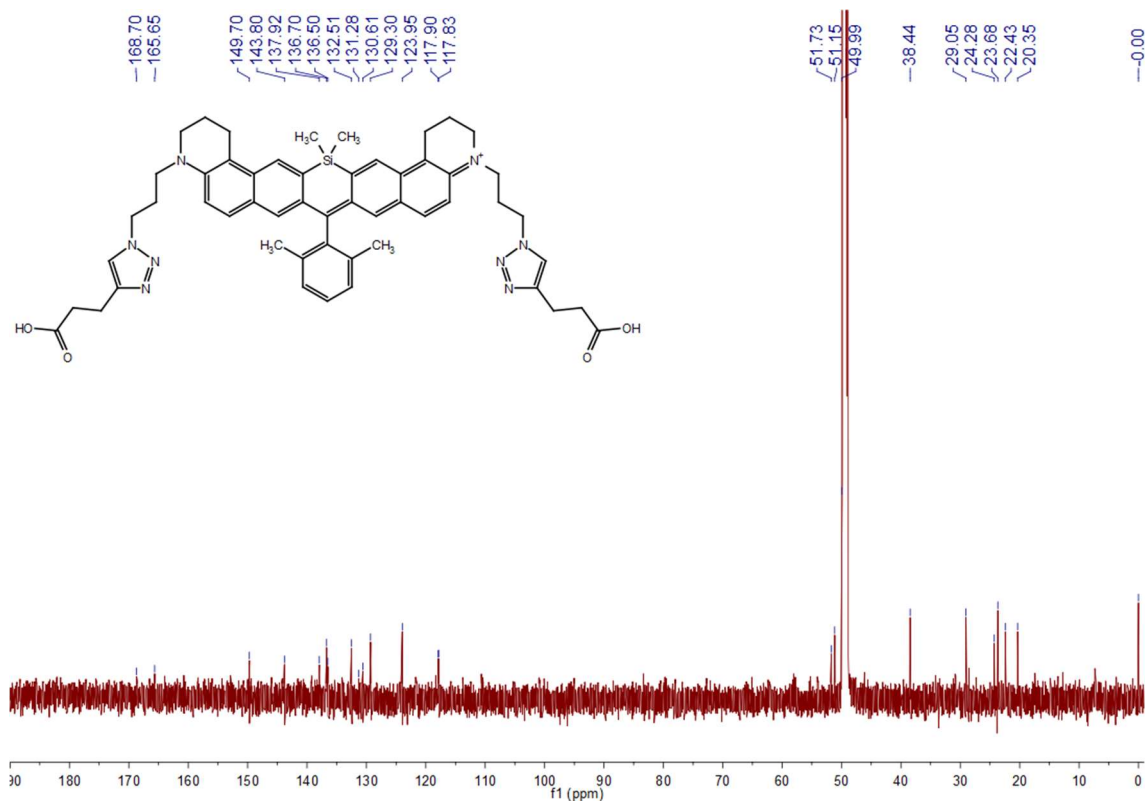

**Supplementary Fig. 71:** The  $^{13}\text{C}$ -NMR of compound ESi5-C2 in  $\text{CD}_3\text{OD}$ .

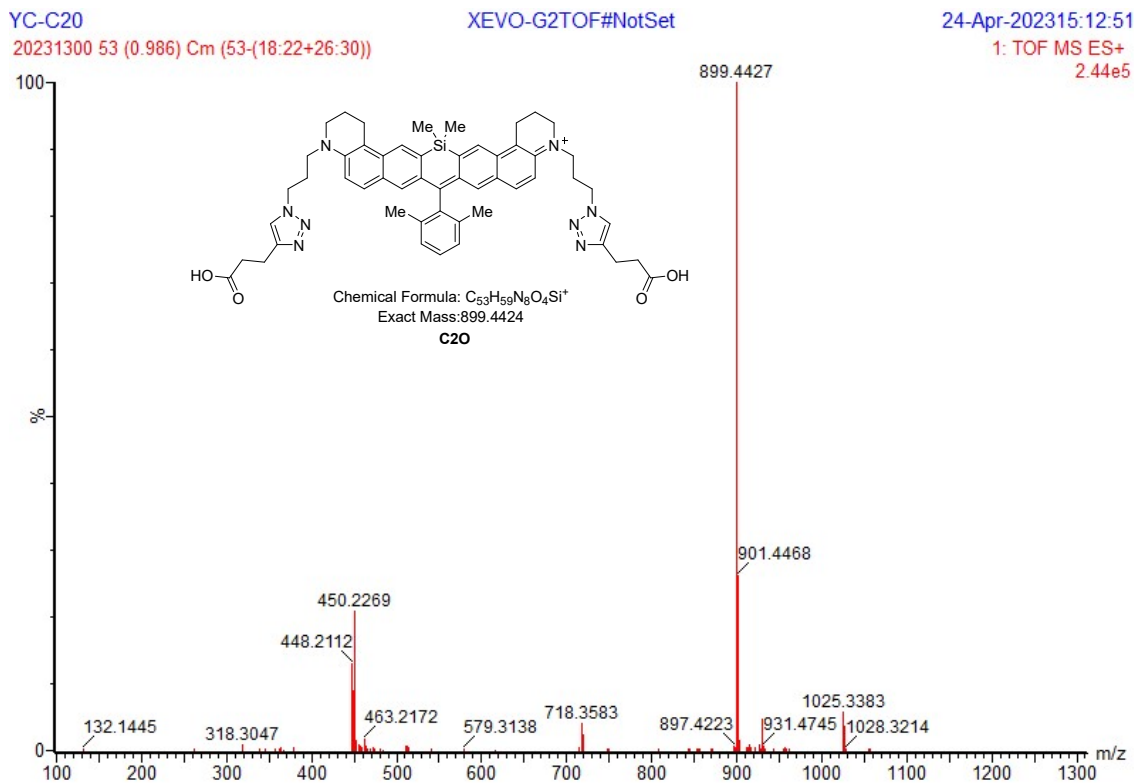

**Supplementary Fig. 72:** The HRMS of compound ESi5-C2.



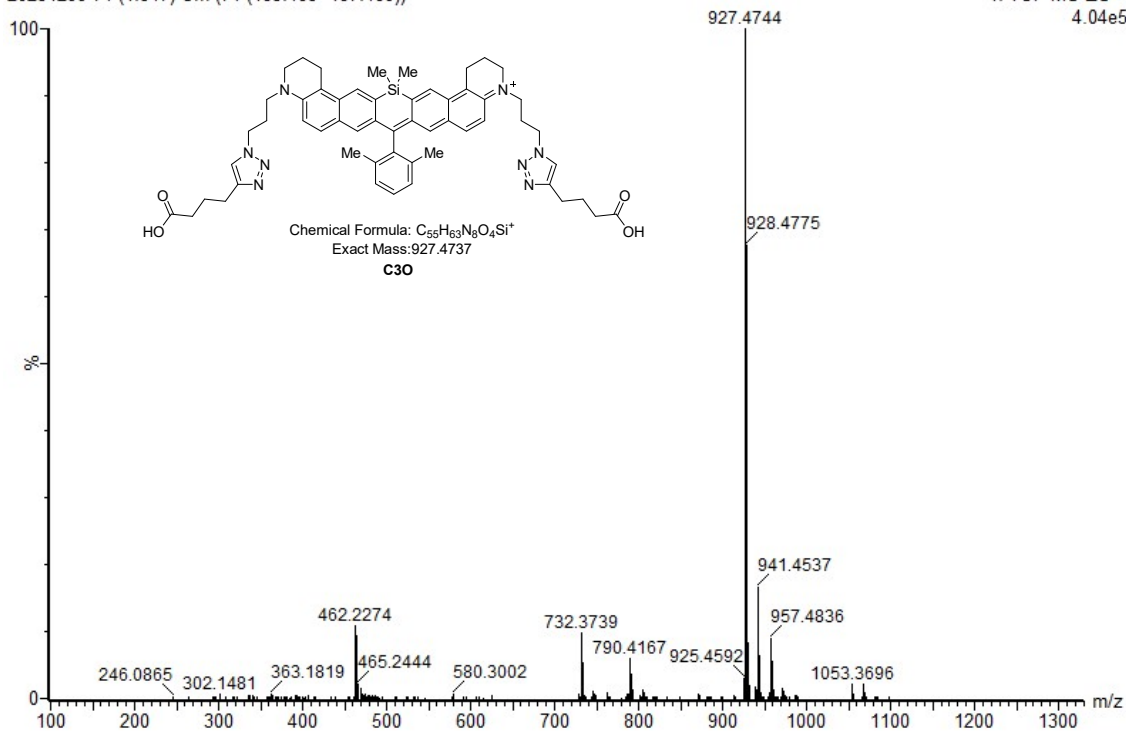

Supplementary Fig. 75: The HRMS of compound ESi5-C3.

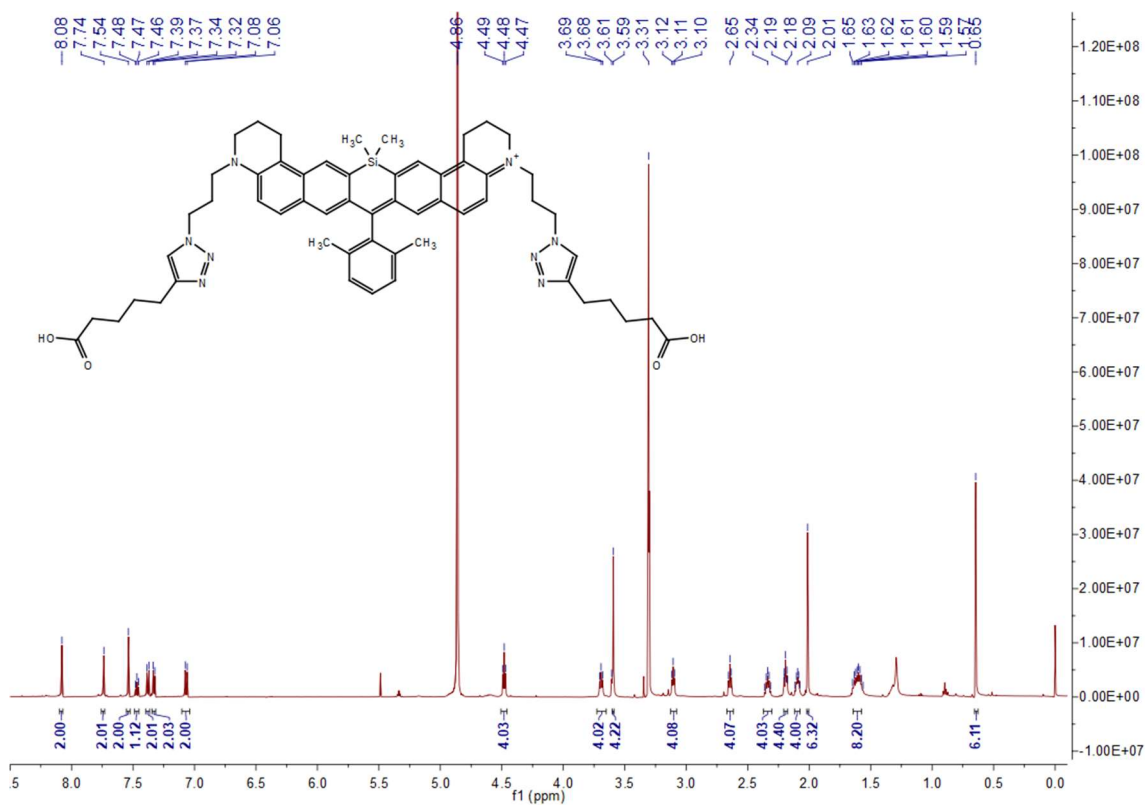

Supplementary Fig. 76: The  $^1H$ -NMR of compound ESi5-C4 in  $CD_3OD$ .

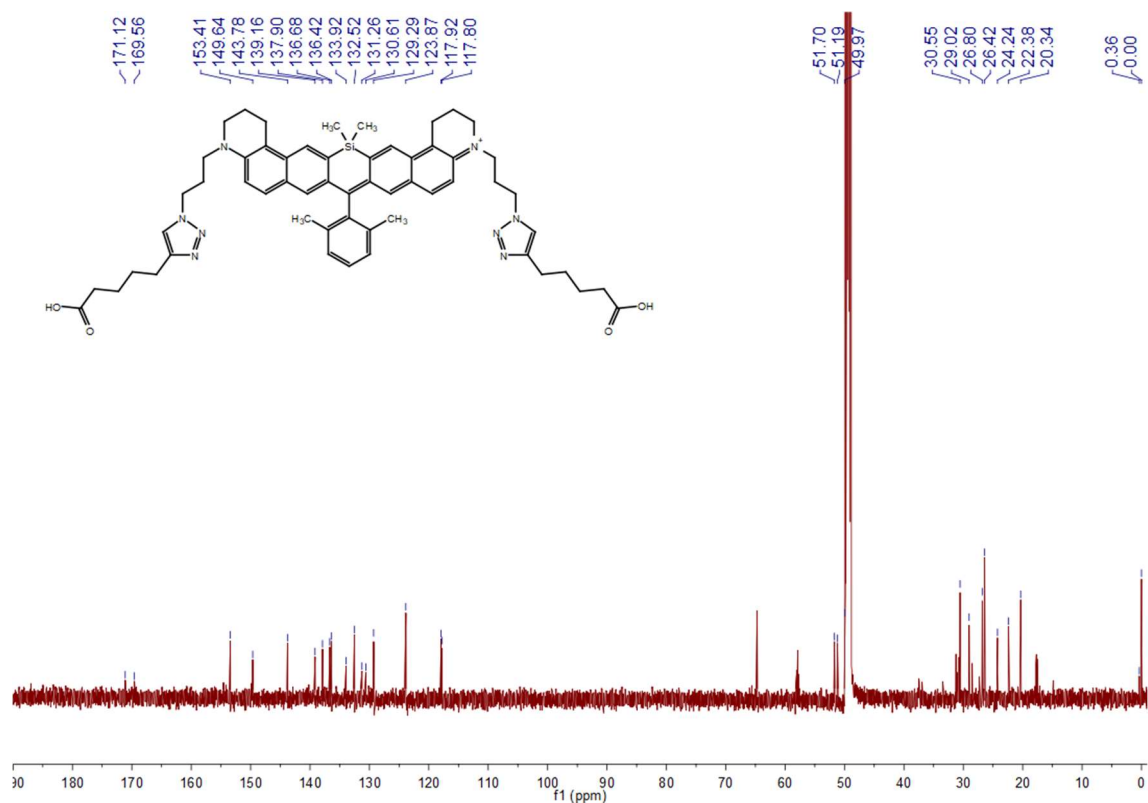

Supplementary Fig. 77: The  $^{13}\text{C}$ -NMR of compound ESi5-C4 in  $\text{CD}_3\text{OD}$ .

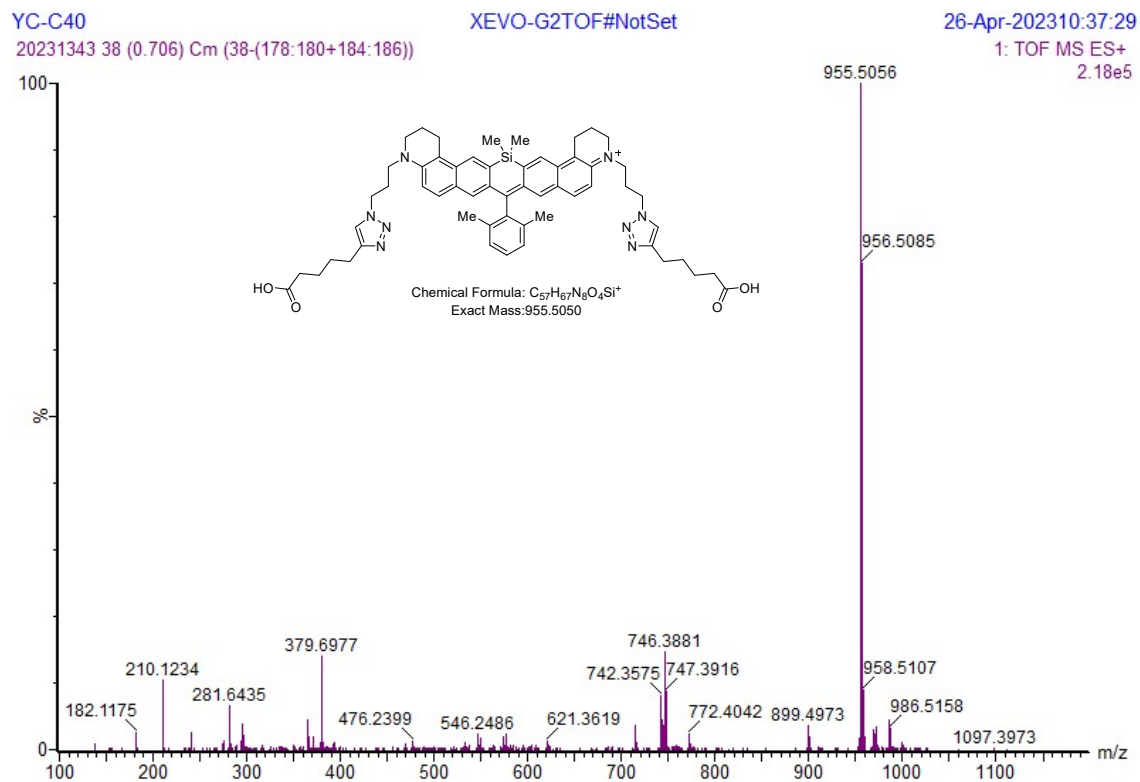

Supplementary Fig. 78: The HRMS of compound ESi5-C4.

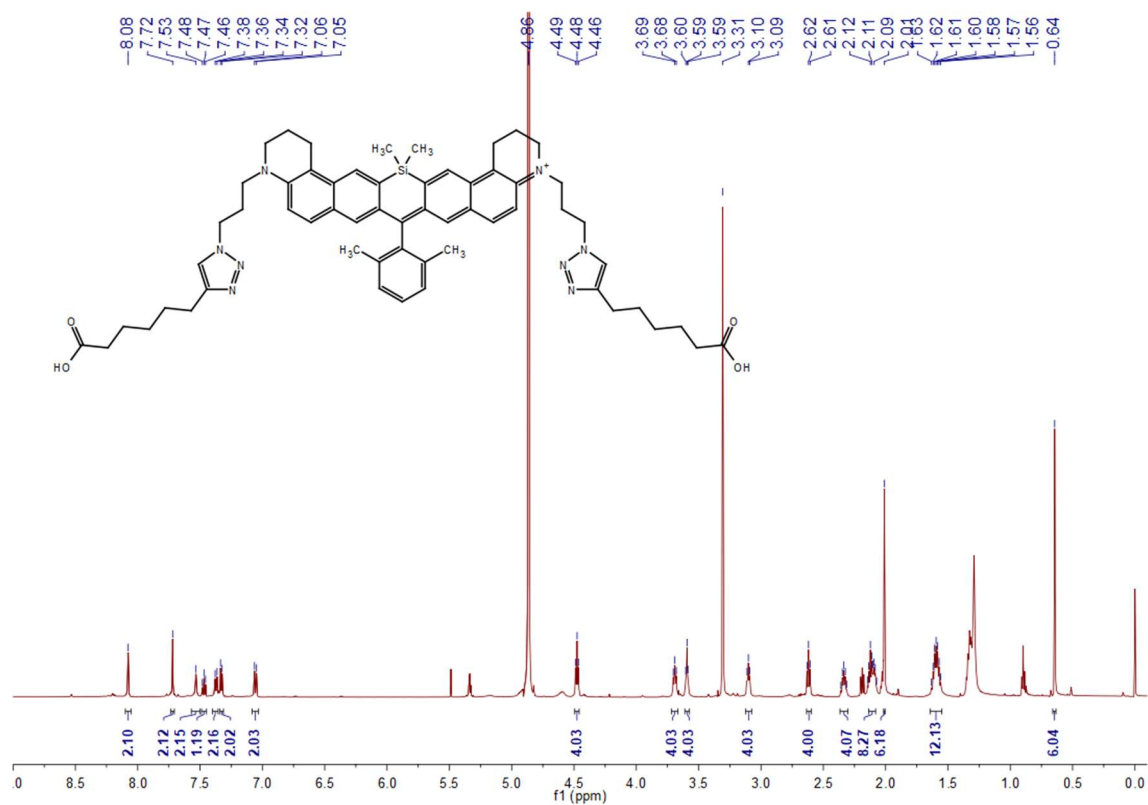

Supplementary Fig. 79: The <sup>1</sup>H-NMR of compound ESI5-C5 in CD<sub>3</sub>OD.

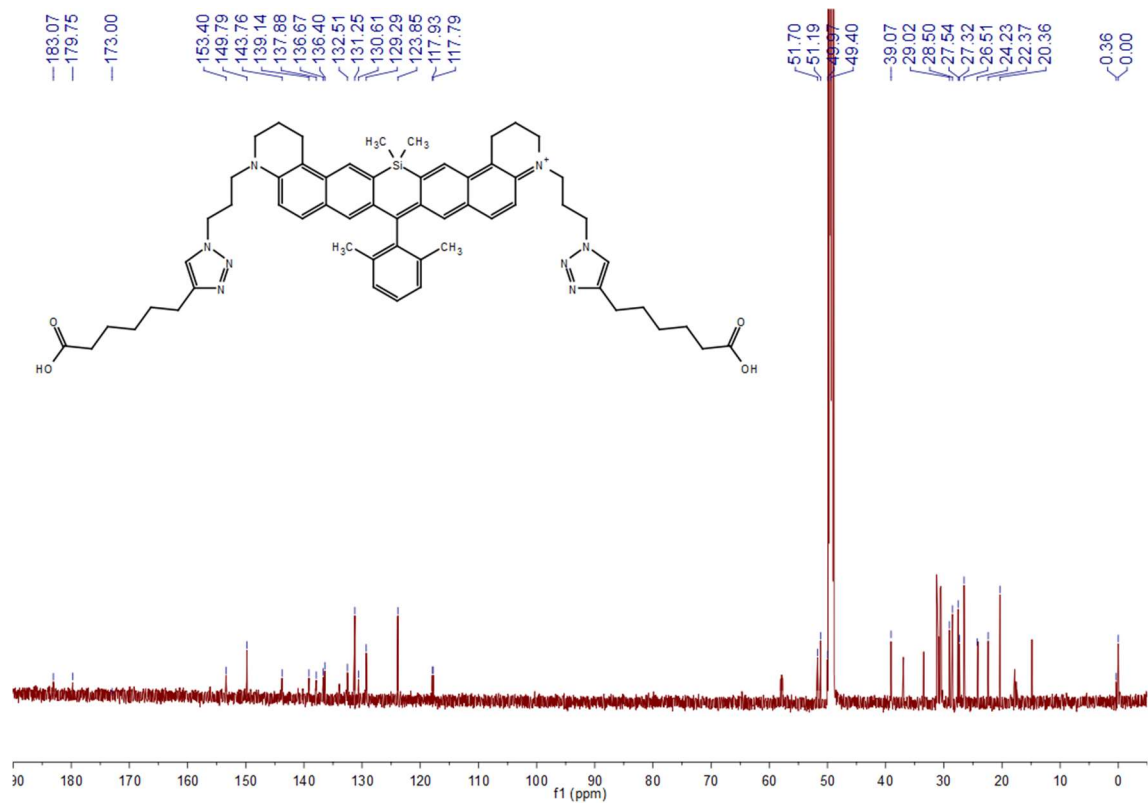

Supplementary Fig. 80: The <sup>13</sup>C-NMR of compound ESI5-C5 in CD<sub>3</sub>OD.



YC-C50

20231344 41 (0.769) Cm (41-(5:10+12:20))

XEVO-G2TOF#NotSet

26-Apr-2023 10:43:13

1: TOF MS ES+  
1.51e5

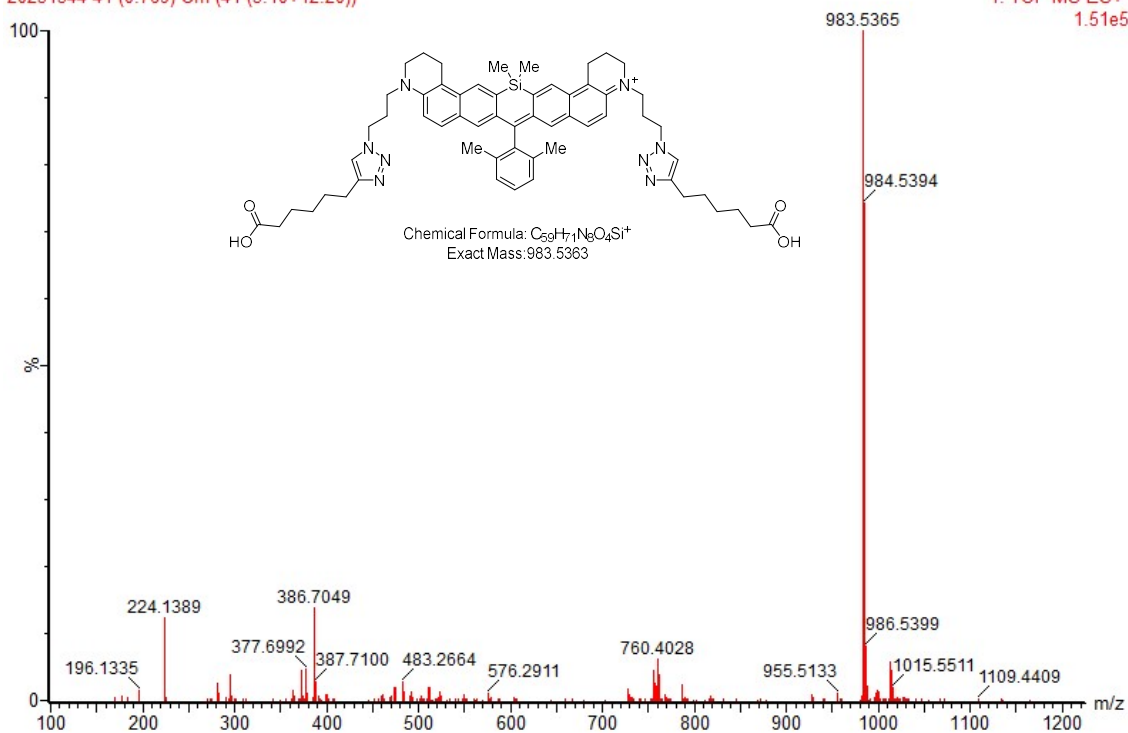

Supplementary Fig. 81: The HRMS of compound ESi5-C5.

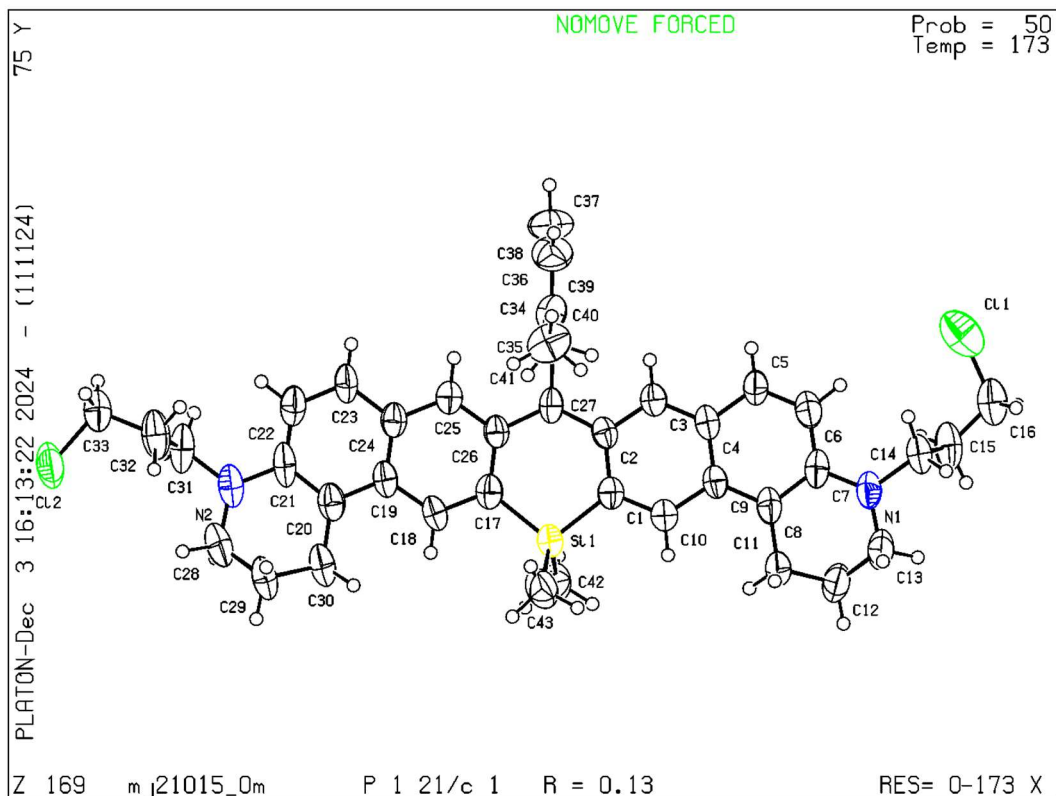

**Supplementary Fig. 82:** The ORTEP-style illustration of  $\text{ESi5}\cdot\text{Cl}^-$  (CCDC 2120399).

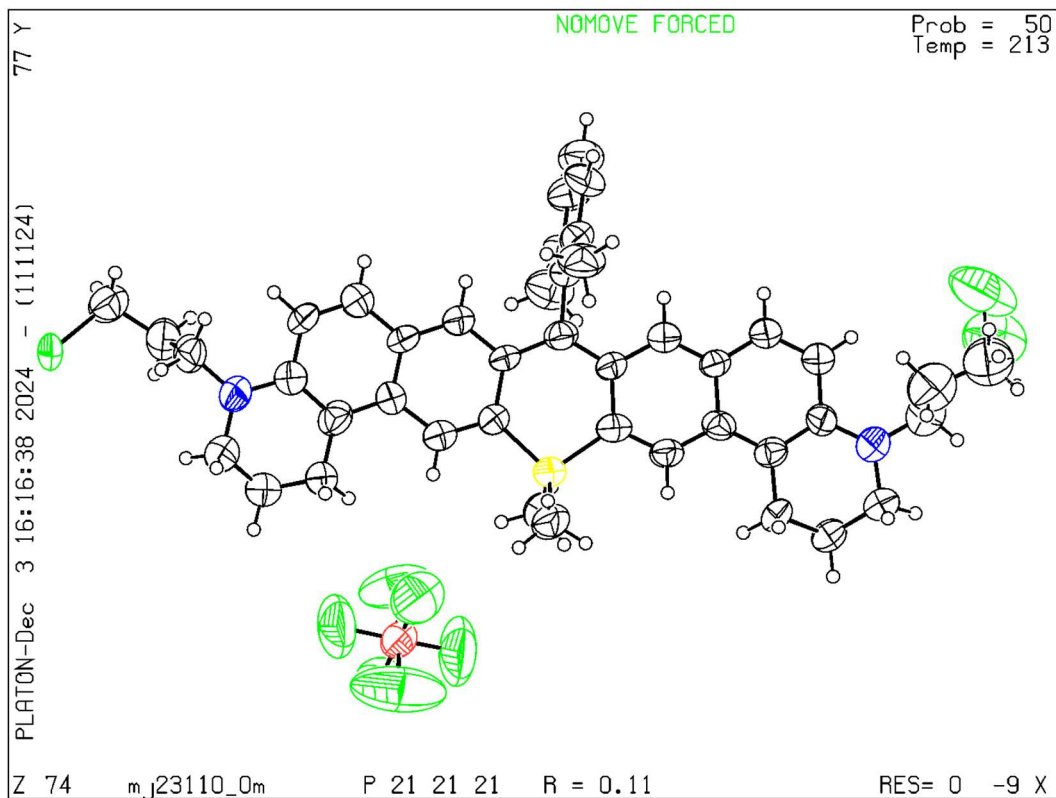

**Supplementary Fig. 83:** The ORTEP-style illustration of  $\text{ESi5}\cdot\text{PF}_6^-$  (CCDC 2364282). (A level b error is indicated for 2364282.)
