# Supplementary material for: A stable and biocompatible shortwave infrared nanoribbon for dual-channel in vivo imaging
Source: PubMed Central journal article supplement — Nat Commun. 2025 Jan 2;16:4. doi: 10.1038/s41467-024-55445-x (PMC11696549; doi:10.1038/s41467-024-55445-x), 2025-01-02
Supplement: 41467_2024_55445_MOESM2_ESM.pdf [file 41467_2024_55445_MOESM2_ESM.pdf]

## **Description of Additional Supplementary Files**

**File Name: Supplementary Data 1**

**Description:** Atomic coordinates of the optimized compounds
